# Supplementary material for: A tensor decomposition-based integrated analysis applicable to multiple gene expression profiles without sample matching
Source: Sci Rep. 2022 Dec 8;12:21242. doi: 10.1038/s41598-022-25524-4 (PMC9732005; doi:10.1038/s41598-022-25524-4)
Supplement: Supplementary file 6 — Supplementary Information 6. [file 41598_2022_25524_MOESM6_ESM.csv]

Accession	Title	Sample Type	Taxonomy	Channels	Platform	Series	Supplementary Types	Supplementary Links	SRA Accession	Contact	Release Date
GSM5018704	dge1_A01 RNA-seq of ReNcell VM treated with 0.3 uM bx-912	SRA	Homo sapiens	1	GPL18573	GSE164788	SRA Run Selector	https://www.ncbi.nlm.nih.gov/Traces/study/?acc=SRX9834053	SRX9834053	Clemens Hug	Jan 14, 2021
GSM5018705	dge1_A02 RNA-seq of ReNcell VM treated with 10 uM hg-9-91-01	SRA	Homo sapiens	1	GPL18573	GSE164788	SRA Run Selector	https://www.ncbi.nlm.nih.gov/Traces/study/?acc=SRX9834061	SRX9834061	Clemens Hug	Jan 14, 2021
GSM5018706	dge1_A03 RNA-seq of ReNcell VM treated with 0.3 uM pha-665752	SRA	Homo sapiens	1	GPL18573	GSE164788	SRA Run Selector	https://www.ncbi.nlm.nih.gov/Traces/study/?acc=SRX9834193	SRX9834193	Clemens Hug	Jan 14, 2021
GSM5018707	dge1_A04 RNA-seq of ReNcell VM treated with 1 uM chitosan	SRA	Homo sapiens	1	GPL18573	GSE164788	SRA Run Selector	https://www.ncbi.nlm.nih.gov/Traces/study/?acc=SRX9834091	SRX9834091	Clemens Hug	Jan 14, 2021
GSM5018708	dge1_A05 RNA-seq of ReNcell VM treated with 1 uM bortezomib	SRA	Homo sapiens	1	GPL18573	GSE164788	SRA Run Selector	https://www.ncbi.nlm.nih.gov/Traces/study/?acc=SRX9834346	SRX9834346	Clemens Hug	Jan 14, 2021
GSM5018709	dge1_A06 RNA-seq of ReNcell VM treated with 0.3 uM (+)-jq1	SRA	Homo sapiens	1	GPL18573	GSE164788	SRA Run Selector	https://www.ncbi.nlm.nih.gov/Traces/study/?acc=SRX9834470	SRX9834470	Clemens Hug	Jan 14, 2021
GSM5018710	dge1_A07 RNA-seq of ReNcell VM treated with 1 uM brivanib	SRA	Homo sapiens	1	GPL18573	GSE164788	SRA Run Selector	https://www.ncbi.nlm.nih.gov/Traces/study/?acc=SRX9834165	SRX9834165	Clemens Hug	Jan 14, 2021
GSM5018711	dge1_A08 RNA-seq of ReNcell VM treated with 10 uM mg-132	SRA	Homo sapiens	1	GPL18573	GSE164788	SRA Run Selector	https://www.ncbi.nlm.nih.gov/Traces/study/?acc=SRX9834219	SRX9834219	Clemens Hug	Jan 14, 2021
GSM5018712	dge1_A09 RNA-seq of ReNcell VM treated with 0.3 uM torin1	SRA	Homo sapiens	1	GPL18573	GSE164788	SRA Run Selector	https://www.ncbi.nlm.nih.gov/Traces/study/?acc=SRX9833793	SRX9833793	Clemens Hug	Jan 14, 2021
GSM5018713	dge1_A10 RNA-seq of ReNcell VM treated with 1 uM bx-912	SRA	Homo sapiens	1	GPL18573	GSE164788	SRA Run Selector	https://www.ncbi.nlm.nih.gov/Traces/study/?acc=SRX9833811	SRX9833811	Clemens Hug	Jan 14, 2021
GSM5018714	dge1_A11 RNA-seq of ReNcell VM treated with 10 uM tofacitinib	SRA	Homo sapiens	1	GPL18573	GSE164788	SRA Run Selector	https://www.ncbi.nlm.nih.gov/Traces/study/?acc=SRX9834062	SRX9834062	Clemens Hug	Jan 14, 2021
GSM5018715	dge1_A12 RNA-seq of ReNcell VM treated with 1 uM fedratinib	SRA	Homo sapiens	1	GPL18573	GSE164788	SRA Run Selector	https://www.ncbi.nlm.nih.gov/Traces/study/?acc=SRX9834338	SRX9834338	Clemens Hug	Jan 14, 2021
GSM5018716	dge1_A13 RNA-seq of ReNcell VM treated with 10 uM kw2449	SRA	Homo sapiens	1	GPL18573	GSE164788	SRA Run Selector	https://www.ncbi.nlm.nih.gov/Traces/study/?acc=SRX9834360	SRX9834360	Clemens Hug	Jan 14, 2021
GSM5018717	dge1_A14 RNA-seq of ReNcell VM treated with 0.3 uM sb202190	SRA	Homo sapiens	1	GPL18573	GSE164788	SRA Run Selector	https://www.ncbi.nlm.nih.gov/Traces/study/?acc=SRX9834481	SRX9834481	Clemens Hug	Jan 14, 2021
GSM5018718	dge1_A15 RNA-seq of ReNcell VM treated with 1 uM (+)-jq1	SRA	Homo sapiens	1	GPL18573	GSE164788	SRA Run Selector	https://www.ncbi.nlm.nih.gov/Traces/study/?acc=SRX9834491	SRX9834491	Clemens Hug	Jan 14, 2021
GSM5018719	dge1_A16 RNA-seq of ReNcell VM treated with 10 uM ldn-193189	SRA	Homo sapiens	1	GPL18573	GSE164788	SRA Run Selector	https://www.ncbi.nlm.nih.gov/Traces/study/?acc=SRX9834510	SRX9834510	Clemens Hug	Jan 14, 2021
GSM5018720	dge1_A17 RNA-seq of ReNcell VM treated with 10 uM zm-447439	SRA	Homo sapiens	1	GPL18573	GSE164788	SRA Run Selector	https://www.ncbi.nlm.nih.gov/Traces/study/?acc=SRX9834551	SRX9834551	Clemens Hug	Jan 14, 2021
GSM5018721	dge1_A18 RNA-seq of ReNcell VM treated with 3 uM kw2449	SRA	Homo sapiens	1	GPL18573	GSE164788	SRA Run Selector	https://www.ncbi.nlm.nih.gov/Traces/study/?acc=SRX9833952	SRX9833952	Clemens Hug	Jan 14, 2021
GSM5018722	dge1_A19 RNA-seq of ReNcell VM treated with 10 uM a443654	SRA	Homo sapiens	1	GPL18573	GSE164788	SRA Run Selector	https://www.ncbi.nlm.nih.gov/Traces/study/?acc=SRX9833977	SRX9833977	Clemens Hug	Jan 14, 2021
GSM5018723	dge1_A20 RNA-seq of ReNcell VM treated with 0.3 uM r 59-022	SRA	Homo sapiens	1	GPL18573	GSE164788	SRA Run Selector	https://www.ncbi.nlm.nih.gov/Traces/study/?acc=SRX9833990	SRX9833990	Clemens Hug	Jan 14, 2021
GSM5018724	dge1_A21 RNA-seq of ReNcell VM treated with 10 uM pha-665752	SRA	Homo sapiens	1	GPL18573	GSE164788	SRA Run Selector	https://www.ncbi.nlm.nih.gov/Traces/study/?acc=SRX9834194	SRX9834194	Clemens Hug	Jan 14, 2021
GSM5018725	dge1_A22 RNA-seq of ReNcell VM treated with dsRNA + lipofectamine	SRA	Homo sapiens	1	GPL18573	GSE164788	SRA Run Selector	https://www.ncbi.nlm.nih.gov/Traces/study/?acc=SRX9834226	SRX9834226	Clemens Hug	Jan 14, 2021
GSM5018726	dge1_A23 RNA-seq of ReNcell VM treated with dsRNA + lipofectamine	SRA	Homo sapiens	1	GPL18573	GSE164788	SRA Run Selector	https://www.ncbi.nlm.nih.gov/Traces/study/?acc=SRX9834250	SRX9834250	Clemens Hug	Jan 14, 2021
GSM5018727	dge1_A24 RNA-seq of ReNcell VM treated with 1 uM rotenone	SRA	Homo sapiens	1	GPL18573	GSE164788	SRA Run Selector	https://www.ncbi.nlm.nih.gov/Traces/study/?acc=SRX9834291	SRX9834291	Clemens Hug	Jan 14, 2021
GSM5018728	dge1_B01 RNA-seq of ReNcell VM treated with 1 uM gsk1059615	SRA	Homo sapiens	1	GPL18573	GSE164788	SRA Run Selector	https://www.ncbi.nlm.nih.gov/Traces/study/?acc=SRX9834321	SRX9834321	Clemens Hug	Jan 14, 2021
GSM5018729	dge1_B02 RNA-seq of ReNcell VM treated with 10 uM tofacitinib	SRA	Homo sapiens	1	GPL18573	GSE164788	SRA Run Selector	https://www.ncbi.nlm.nih.gov/Traces/study/?acc=SRX9833838	SRX9833838	Clemens Hug	Jan 14, 2021
GSM5018730	dge1_B03 RNA-seq of ReNcell VM treated with 1 uM fccp	SRA	Homo sapiens	1	GPL18573	GSE164788	SRA Run Selector	https://www.ncbi.nlm.nih.gov/Traces/study/?acc=SRX9833868	SRX9833868	Clemens Hug	Jan 14, 2021
GSM5018731	dge1_B04 RNA-seq of ReNcell VM treated with 1 uM cabozantinib	SRA	Homo sapiens	1	GPL18573	GSE164788	SRA Run Selector	https://www.ncbi.nlm.nih.gov/Traces/study/?acc=SRX9833908	SRX9833908	Clemens Hug	Jan 14, 2021
GSM5018732	dge1_B05 RNA-seq of ReNcell VM treated with 3 uM brivanib	SRA	Homo sapiens	1	GPL18573	GSE164788	SRA Run Selector	https://www.ncbi.nlm.nih.gov/Traces/study/?acc=SRX9833919	SRX9833919	Clemens Hug	Jan 14, 2021
GSM5018733	dge1_B06 RNA-seq of ReNcell VM treated with 0.3 uM metformin	SRA	Homo sapiens	1	GPL18573	GSE164788	SRA Run Selector	https://www.ncbi.nlm.nih.gov/Traces/study/?acc=SRX9833932	SRX9833932	Clemens Hug	Jan 14, 2021
GSM5018734	dge1_B07 RNA-seq of ReNcell VM treated with 10 uM gsk1059615	SRA	Homo sapiens	1	GPL18573	GSE164788	SRA Run Selector	https://www.ncbi.nlm.nih.gov/Traces/study/?acc=SRX9834092	SRX9834092	Clemens Hug	Jan 14, 2021
GSM5018735	dge1_B08 RNA-seq of ReNcell VM treated with 0.3 uM tofacitinib	SRA	Homo sapiens	1	GPL18573	GSE164788	SRA Run Selector	https://www.ncbi.nlm.nih.gov/Traces/study/?acc=SRX9834107	SRX9834107	Clemens Hug	Jan 14, 2021
GSM5018736	dge1_B09 RNA-seq of ReNcell VM treated with 10 uM sb202190	SRA	Homo sapiens	1	GPL18573	GSE164788	SRA Run Selector	https://www.ncbi.nlm.nih.gov/Traces/study/?acc=SRX9834128	SRX9834128	Clemens Hug	Jan 14, 2021
GSM5018737	dge1_B10 RNA-seq of ReNcell VM treated with 10 uM pf04217903	SRA	Homo sapiens	1	GPL18573	GSE164788	SRA Run Selector	https://www.ncbi.nlm.nih.gov/Traces/study/?acc=SRX9834147	SRX9834147	Clemens Hug	Jan 14, 2021
GSM5018738	dge1_B11 RNA-seq of ReNcell VM treated with 1 uM ruxolitinib	SRA	Homo sapiens	1	GPL18573	GSE164788	SRA Run Selector	https://www.ncbi.nlm.nih.gov/Traces/study/?acc=SRX9834017	SRX9834017	Clemens Hug	Jan 14, 2021
GSM5018739	dge1_B12 RNA-seq of ReNcell VM treated with 10 uM ruxolitinib	SRA	Homo sapiens	1	GPL18573	GSE164788	SRA Run Selector	https://www.ncbi.nlm.nih.gov/Traces/study/?acc=SRX9834028	SRX9834028	Clemens Hug	Jan 14, 2021
GSM5018740	dge1_B13 RNA-seq of ReNcell VM treated with 0.3 uM plx-4720	SRA	Homo sapiens	1	GPL18573	GSE164788	SRA Run Selector	https://www.ncbi.nlm.nih.gov/Traces/study/?acc=SRX9834046	SRX9834046	Clemens Hug	Jan 14, 2021
GSM5018741	dge1_B14 RNA-seq of ReNcell VM treated with 1 uM tofacitinib	SRA	Homo sapiens	1	GPL18573	GSE164788	SRA Run Selector	https://www.ncbi.nlm.nih.gov/Traces/study/?acc=SRX9834058	SRX9834058	Clemens Hug	Jan 14, 2021
GSM5018742	dge1_B15 RNA-seq of ReNcell VM treated with 1 uM pazopanib	SRA	Homo sapiens	1	GPL18573	GSE164788	SRA Run Selector	https://www.ncbi.nlm.nih.gov/Traces/study/?acc=SRX9834076	SRX9834076	Clemens Hug	Jan 14, 2021
GSM5018743	dge1_B16 RNA-seq of ReNcell VM treated with 1 uM alisertib	SRA	Homo sapiens	1	GPL18573	GSE164788	SRA Run Selector	https://www.ncbi.nlm.nih.gov/Traces/study/?acc=SRX9834328	SRX9834328	Clemens Hug	Jan 14, 2021
GSM5018744	dge1_B17 RNA-seq of ReNcell VM treated with 10 uM plx-4720	SRA	Homo sapiens	1	GPL18573	GSE164788	SRA Run Selector	https://www.ncbi.nlm.nih.gov/Traces/study/?acc=SRX9834347	SRX9834347	Clemens Hug	Jan 14, 2021
GSM5018745	dge1_B18 RNA-seq of ReNcell VM treated with 3 uM barasertib	SRA	Homo sapiens	1	GPL18573	GSE164788	SRA Run Selector	https://www.ncbi.nlm.nih.gov/Traces/study/?acc=SRX9834368	SRX9834368	Clemens Hug	Jan 14, 2021
GSM5018746	dge1_B19 RNA-seq of ReNcell VM treated with 3 uM cabozantinib	SRA	Homo sapiens	1	GPL18573	GSE164788	SRA Run Selector	https://www.ncbi.nlm.nih.gov/Traces/study/?acc=SRX9834517	SRX9834517	Clemens Hug	Jan 14, 2021
GSM5018747	dge1_B20 RNA-seq of ReNcell VM treated with 10 uM bortezomib	SRA	Homo sapiens	1	GPL18573	GSE164788	SRA Run Selector	https://www.ncbi.nlm.nih.gov/Traces/study/?acc=SRX9833999	SRX9833999	Clemens Hug	Jan 14, 2021
GSM5018748	dge1_B21 RNA-seq of ReNcell VM treated with 3 uM gsk1070916	SRA	Homo sapiens	1	GPL18573	GSE164788	SRA Run Selector	https://www.ncbi.nlm.nih.gov/Traces/study/?acc=SRX9834201	SRX9834201	Clemens Hug	Jan 14, 2021
GSM5018749	dge1_B22 RNA-seq of ReNcell VM treated with 0.3 uM nvp-tae684	SRA	Homo sapiens	1	GPL18573	GSE164788	SRA Run Selector	https://www.ncbi.nlm.nih.gov/Traces/study/?acc=SRX9834253	SRX9834253	Clemens Hug	Jan 14, 2021
GSM5018750	dge1_B23 RNA-seq of ReNcell VM treated with 0.3 uM (+)-jq1	SRA	Homo sapiens	1	GPL18573	GSE164788	SRA Run Selector	https://www.ncbi.nlm.nih.gov/Traces/study/?acc=SRX9834279	SRX9834279	Clemens Hug	Jan 14, 2021
GSM5018751	dge1_B24 RNA-seq of ReNcell VM treated with 3 uM gsk1059615	SRA	Homo sapiens	1	GPL18573	GSE164788	SRA Run Selector	https://www.ncbi.nlm.nih.gov/Traces/study/?acc=SRX9834410	SRX9834410	Clemens Hug	Jan 14, 2021
GSM5018752	dge1_C01 RNA-seq of ReNcell VM treated with 10 uM plx-4720	SRA	Homo sapiens	1	GPL18573	GSE164788	SRA Run Selector	https://www.ncbi.nlm.nih.gov/Traces/study/?acc=SRX9834426	SRX9834426	Clemens Hug	Jan 14, 2021
GSM5018753	dge1_C02 RNA-seq of ReNcell VM treated with 0.3 uM gsk1059615	SRA	Homo sapiens	1	GPL18573	GSE164788	SRA Run Selector	https://www.ncbi.nlm.nih.gov/Traces/study/?acc=SRX9834452	SRX9834452	Clemens Hug	Jan 14, 2021
GSM5018754	dge1_C03 RNA-seq of ReNcell VM treated with 1 uM torin1	SRA	Homo sapiens	1	GPL18573	GSE164788	SRA Run Selector	https://www.ncbi.nlm.nih.gov/Traces/study/?acc=SRX9834471	SRX9834471	Clemens Hug	Jan 14, 2021
GSM5018755	dge1_C04 RNA-seq of ReNcell VM treated with 1 uM pf04217903	SRA	Homo sapiens	1	GPL18573	GSE164788	SRA Run Selector	https://www.ncbi.nlm.nih.gov/Traces/study/?acc=SRX9833802	SRX9833802	Clemens Hug	Jan 14, 2021
GSM5018756	dge1_C05 RNA-seq of ReNcell VM treated with lipopolysaccharide	SRA	Homo sapiens	1	GPL18573	GSE164788	SRA Run Selector	https://www.ncbi.nlm.nih.gov/Traces/study/?acc=SRX9833820	SRX9833820	Clemens Hug	Jan 14, 2021
GSM5018757	dge1_C06 RNA-seq of ReNcell VM treated with 10 uM barasertib	SRA	Homo sapiens	1	GPL18573	GSE164788	SRA Run Selector	https://www.ncbi.nlm.nih.gov/Traces/study/?acc=SRX9833851	SRX9833851	Clemens Hug	Jan 14, 2021
GSM5018758	dge1_C07 RNA-seq of ReNcell VM treated with 0.3 uM alisertib	SRA	Homo sapiens	1	GPL18573	GSE164788	SRA Run Selector	https://www.ncbi.nlm.nih.gov/Traces/study/?acc=SRX9833862	SRX9833862	Clemens Hug	Jan 14, 2021
GSM5018759	dge1_C08 RNA-seq of ReNcell VM treated with 3 uM hg-9-91-01	SRA	Homo sapiens	1	GPL18573	GSE164788	SRA Run Selector	https://www.ncbi.nlm.nih.gov/Traces/study/?acc=SRX9833888	SRX9833888	Clemens Hug	Jan 14, 2021
GSM5018760	dge1_C09 RNA-seq of ReNcell VM treated with 1 uM r 59949	SRA	Homo sapiens	1	GPL18573	GSE164788	SRA Run Selector	https://www.ncbi.nlm.nih.gov/Traces/study/?acc=SRX9833899	SRX9833899	Clemens Hug	Jan 14, 2021
GSM5018761	dge1_C10 RNA-seq of ReNcell VM treated with 10 uM mg-132	SRA	Homo sapiens	1	GPL18573	GSE164788	SRA Run Selector	https://www.ncbi.nlm.nih.gov/Traces/study/?acc=SRX9833926	SRX9833926	Clemens Hug	Jan 14, 2021
GSM5018762	dge1_C11 RNA-seq of ReNcell VM treated with 3 uM ruxolitinib	SRA	Homo sapiens	1	GPL18573	GSE164788	SRA Run Selector	https://www.ncbi.nlm.nih.gov/Traces/study/?acc=SRX9834111	SRX9834111	Clemens Hug	Jan 14, 2021
GSM5018763	dge1_C12 RNA-seq of ReNcell VM treated with 3 uM sb202190	SRA	Homo sapiens	1	GPL18573	GSE164788	SRA Run Selector	https://www.ncbi.nlm.nih.gov/Traces/study/?acc=SRX9834139	SRX9834139	Clemens Hug	Jan 14, 2021
GSM5018764	dge1_C13 RNA-seq of ReNcell VM treated with 0.3 uM r 59949	SRA	Homo sapiens	1	GPL18573	GSE164788	SRA Run Selector	https://www.ncbi.nlm.nih.gov/Traces/study/?acc=SRX9834079	SRX9834079	Clemens Hug	Jan 14, 2021
GSM5018765	dge1_C14 RNA-seq of ReNcell VM treated with 10 uM r 59949	SRA	Homo sapiens	1	GPL18573	GSE164788	SRA Run Selector	https://www.ncbi.nlm.nih.gov/Traces/study/?acc=SRX9834036	SRX9834036	Clemens Hug	Jan 14, 2021
GSM5018766	dge1_C15 RNA-seq of ReNcell VM treated with 10 uM r 59949	SRA	Homo sapiens	1	GPL18573	GSE164788	SRA Run Selector	https://www.ncbi.nlm.nih.gov/Traces/study/?acc=SRX9834371	SRX9834371	Clemens Hug	Jan 14, 2021
GSM5018767	dge1_C16 RNA-seq of ReNcell VM treated with 10 uM pf04217903	SRA	Homo sapiens	1	GPL18573	GSE164788	SRA Run Selector	https://www.ncbi.nlm.nih.gov/Traces/study/?acc=SRX9834477	SRX9834477	Clemens Hug	Jan 14, 2021
GSM5018768	dge1_C17 RNA-seq of ReNcell VM treated with 1 uM ldn-193189	SRA	Homo sapiens	1	GPL18573	GSE164788	SRA Run Selector	https://www.ncbi.nlm.nih.gov/Traces/study/?acc=SRX9834523	SRX9834523	Clemens Hug	Jan 14, 2021
GSM5018769	dge1_C18 RNA-seq of ReNcell VM treated with lipopolysaccharide	SRA	Homo sapiens	1	GPL18573	GSE164788	SRA Run Selector	https://www.ncbi.nlm.nih.gov/Traces/study/?acc=SRX9834550	SRX9834550	Clemens Hug	Jan 14, 2021
GSM5018770	dge1_C19 RNA-seq of ReNcell VM treated with 1 uM r 59949	SRA	Homo sapiens	1	GPL18573	GSE164788	SRA Run Selector	https://www.ncbi.nlm.nih.gov/Traces/study/?acc=SRX9833955	SRX9833955	Clemens Hug	Jan 14, 2021
GSM5018771	dge1_C20 RNA-seq of ReNcell VM treated with 3 uM brivanib	SRA	Homo sapiens	1	GPL18573	GSE164788	SRA Run Selector	https://www.ncbi.nlm.nih.gov/Traces/study/?acc=SRX9833975	SRX9833975	Clemens Hug	Jan 14, 2021
GSM5018772	dge1_C21 RNA-seq of ReNcell VM treated with 1 uM r 59-022	SRA	Homo sapiens	1	GPL18573	GSE164788	SRA Run Selector	https://www.ncbi.nlm.nih.gov/Traces/study/?acc=SRX9834003	SRX9834003	Clemens Hug	Jan 14, 2021
GSM5018773	dge1_C22 RNA-seq of ReNcell VM treated with 1 uM mg-132	SRA	Homo sapiens	1	GPL18573	GSE164788	SRA Run Selector	https://www.ncbi.nlm.nih.gov/Traces/study/?acc=SRX9834182	SRX9834182	Clemens Hug	Jan 14, 2021
GSM5018774	dge1_C23 RNA-seq of ReNcell VM treated with 3 uM barasertib	SRA	Homo sapiens	1	GPL18573	GSE164788	SRA Run Selector	https://www.ncbi.nlm.nih.gov/Traces/study/?acc=SRX9834220	SRX9834220	Clemens Hug	Jan 14, 2021
GSM5018775	dge1_C24 RNA-seq of ReNcell VM treated with 3 uM pazopanib	SRA	Homo sapiens	1	GPL18573	GSE164788	SRA Run Selector	https://www.ncbi.nlm.nih.gov/Traces/study/?acc=SRX9834245	SRX9834245	Clemens Hug	Jan 14, 2021
GSM5018776	dge1_D01 RNA-seq of ReNcell VM treated with 10 uM barasertib	SRA	Homo sapiens	1	GPL18573	GSE164788	SRA Run Selector	https://www.ncbi.nlm.nih.gov/Traces/study/?acc=SRX9834265	SRX9834265	Clemens Hug	Jan 14, 2021
GSM5018777	dge1_D02 RNA-seq of ReNcell VM treated with 10 uM rotenone	SRA	Homo sapiens	1	GPL18573	GSE164788	SRA Run Selector	https://www.ncbi.nlm.nih.gov/Traces/study/?acc=SRX9834306	SRX9834306	Clemens Hug	Jan 14, 2021
GSM5018778	dge1_D03 RNA-seq of ReNcell VM treated with 10 uM brivanib	SRA	Homo sapiens	1	GPL18573	GSE164788	SRA Run Selector	https://www.ncbi.nlm.nih.gov/Traces/study/?acc=SRX9834413	SRX9834413	Clemens Hug	Jan 14, 2021
GSM5018779	dge1_D04 RNA-seq of ReNcell VM treated with 1 uM fccp	SRA	Homo sapiens	1	GPL18573	GSE164788	SRA Run Selector	https://www.ncbi.nlm.nih.gov/Traces/study/?acc=SRX9834445	SRX9834445	Clemens Hug	Jan 14, 2021
GSM5018780	dge1_D05 RNA-seq of ReNcell VM treated with 0.3 uM a443654	SRA	Homo sapiens	1	GPL18573	GSE164788	SRA Run Selector	https://www.ncbi.nlm.nih.gov/Traces/study/?acc=SRX9834464	SRX9834464	Clemens Hug	Jan 14, 2021
GSM5018781	dge1_D06 RNA-seq of ReNcell VM treated with 0.3 uM nvp-tae684	SRA	Homo sapiens	1	GPL18573	GSE164788	SRA Run Selector	https://www.ncbi.nlm.nih.gov/Traces/study/?acc=SRX9833841	SRX9833841	Clemens Hug	Jan 14, 2021
GSM5018782	dge1_D07 RNA-seq of ReNcell VM treated with 3 uM bx-912	SRA	Homo sapiens	1	GPL18573	GSE164788	SRA Run Selector	https://www.ncbi.nlm.nih.gov/Traces/study/?acc=SRX9833842	SRX9833842	Clemens Hug	Jan 14, 2021
GSM5018783	dge1_D08 RNA-seq of ReNcell VM treated with 3 uM cabozantinib	SRA	Homo sapiens	1	GPL18573	GSE164788	SRA Run Selector	https://www.ncbi.nlm.nih.gov/Traces/study/?acc=SRX9833843	SRX9833843	Clemens Hug	Jan 14, 2021
GSM5018784	dge1_D09 RNA-seq of ReNcell VM treated with 3 uM torin1	SRA	Homo sapiens	1	GPL18573	GSE164788	SRA Run Selector	https://www.ncbi.nlm.nih.gov/Traces/study/?acc=SRX9833794	SRX9833794	Clemens Hug	Jan 14, 2021
GSM5018785	dge1_D10 RNA-seq of ReNcell VM treated with 10 uM ruxolitinib	SRA	Homo sapiens	1	GPL18573	GSE164788	SRA Run Selector	https://www.ncbi.nlm.nih.gov/Traces/study/?acc=SRX9833795	SRX9833795	Clemens Hug	Jan 14, 2021
GSM5018786	dge1_D11 RNA-seq of ReNcell VM treated with 1 uM a443654	SRA	Homo sapiens	1	GPL18573	GSE164788	SRA Run Selector	https://www.ncbi.nlm.nih.gov/Traces/study/?acc=SRX9833796	SRX9833796	Clemens Hug	Jan 14, 2021
GSM5018787	dge1_D12 RNA-seq of ReNcell VM treated with 3 uM metformin	SRA	Homo sapiens	1	GPL18573	GSE164788	SRA Run Selector	https://www.ncbi.nlm.nih.gov/Traces/study/?acc=SRX9833797	SRX9833797	Clemens Hug	Jan 14, 2021
GSM5018788	dge1_D13 RNA-seq of ReNcell VM treated with 10 uM barasertib	SRA	Homo sapiens	1	GPL18573	GSE164788	SRA Run Selector	https://www.ncbi.nlm.nih.gov/Traces/study/?acc=SRX9833798	SRX9833798	Clemens Hug	Jan 14, 2021
GSM5018789	dge1_D14 RNA-seq of ReNcell VM treated with 0.3 uM fedratinib	SRA	Homo sapiens	1	GPL18573	GSE164788	SRA Run Selector	https://www.ncbi.nlm.nih.gov/Traces/study/?acc=SRX9833799	SRX9833799	Clemens Hug	Jan 14, 2021
GSM5018790	dge1_D15 RNA-seq of ReNcell VM treated with 3 uM tofacitinib	SRA	Homo sapiens	1	GPL18573	GSE164788	SRA Run Selector	https://www.ncbi.nlm.nih.gov/Traces/study/?acc=SRX9833807	SRX9833807	Clemens Hug	Jan 14, 2021
GSM5018791	dge1_D16 RNA-seq of ReNcell VM treated with 3 uM cabozantinib	SRA	Homo sapiens	1	GPL18573	GSE164788	SRA Run Selector	https://www.ncbi.nlm.nih.gov/Traces/study/?acc=SRX9833808	SRX9833808	Clemens Hug	Jan 14, 2021
GSM5018792	dge1_D17 RNA-seq of ReNcell VM treated with 1 uM r 59949	SRA	Homo sapiens	1	GPL18573	GSE164788	SRA Run Selector	https://www.ncbi.nlm.nih.gov/Traces/study/?acc=SRX9833809	SRX9833809	Clemens Hug	Jan 14, 2021
GSM5018793	dge1_D18 RNA-seq of ReNcell VM treated with 0.3 uM kw2449	SRA	Homo sapiens	1	GPL18573	GSE164788	SRA Run Selector	https://www.ncbi.nlm.nih.gov/Traces/study/?acc=SRX9833810	SRX9833810	Clemens Hug	Jan 14, 2021
GSM5018794	dge1_D19 RNA-seq of ReNcell VM treated with 3 uM pha-665752	SRA	Homo sapiens	1	GPL18573	GSE164788	SRA Run Selector	https://www.ncbi.nlm.nih.gov/Traces/study/?acc=SRX9833812	SRX9833812	Clemens Hug	Jan 14, 2021
GSM5018795	dge1_D20 RNA-seq of ReNcell VM treated with 1 uM metformin	SRA	Homo sapiens	1	GPL18573	GSE164788	SRA Run Selector	https://www.ncbi.nlm.nih.gov/Traces/study/?acc=SRX9833813	SRX9833813	Clemens Hug	Jan 14, 2021
GSM5018796	dge1_D21 RNA-seq of ReNcell VM treated with 3 uM barasertib	SRA	Homo sapiens	1	GPL18573	GSE164788	SRA Run Selector	https://www.ncbi.nlm.nih.gov/Traces/study/?acc=SRX9833829	SRX9833829	Clemens Hug	Jan 14, 2021
GSM5018797	dge1_D22 RNA-seq of ReNcell VM treated with 10 uM brivanib	SRA	Homo sapiens	1	GPL18573	GSE164788	SRA Run Selector	https://www.ncbi.nlm.nih.gov/Traces/study/?acc=SRX9833830	SRX9833830	Clemens Hug	Jan 14, 2021
GSM5018798	dge1_D23 RNA-seq of ReNcell VM treated with 1 uM (+)-jq1	SRA	Homo sapiens	1	GPL18573	GSE164788	SRA Run Selector	https://www.ncbi.nlm.nih.gov/Traces/study/?acc=SRX9833831	SRX9833831	Clemens Hug	Jan 14, 2021
GSM5018799	dge1_D24 RNA-seq of ReNcell VM treated with dsRNA	SRA	Homo sapiens	1	GPL18573	GSE164788	SRA Run Selector	https://www.ncbi.nlm.nih.gov/Traces/study/?acc=SRX9833832	SRX9833832	Clemens Hug	Jan 14, 2021
GSM5018800	dge1_E01 RNA-seq of ReNcell VM treated with 10 uM metformin	SRA	Homo sapiens	1	GPL18573	GSE164788	SRA Run Selector	https://www.ncbi.nlm.nih.gov/Traces/study/?acc=SRX9833833	SRX9833833	Clemens Hug	Jan 14, 2021
GSM5018801	dge1_E02 RNA-seq of ReNcell VM treated with 1 uM pha-665752	SRA	Homo sapiens	1	GPL18573	GSE164788	SRA Run Selector	https://www.ncbi.nlm.nih.gov/Traces/study/?acc=SRX9833834	SRX9833834	Clemens Hug	Jan 14, 2021
GSM5018802	dge1_E03 RNA-seq of ReNcell VM treated with 0.3 uM hg-9-91-01	SRA	Homo sapiens	1	GPL18573	GSE164788	SRA Run Selector	https://www.ncbi.nlm.nih.gov/Traces/study/?acc=SRX9833835	SRX9833835	Clemens Hug	Jan 14, 2021
GSM5018803	dge1_E04 RNA-seq of ReNcell VM treated with 0.3 uM (+)-jq1	SRA	Homo sapiens	1	GPL18573	GSE164788	SRA Run Selector	https://www.ncbi.nlm.nih.gov/Traces/study/?acc=SRX9833836	SRX9833836	Clemens Hug	Jan 14, 2021
GSM5018804	dge1_E05 RNA-seq of ReNcell VM treated with 0.3 uM plx-4720	SRA	Homo sapiens	1	GPL18573	GSE164788	SRA Run Selector	https://www.ncbi.nlm.nih.gov/Traces/study/?acc=SRX9834063	SRX9834063	Clemens Hug	Jan 14, 2021
GSM5018805	dge1_E06 RNA-seq of ReNcell VM treated with 0.3 uM zm-447439	SRA	Homo sapiens	1	GPL18573	GSE164788	SRA Run Selector	https://www.ncbi.nlm.nih.gov/Traces/study/?acc=SRX9834064	SRX9834064	Clemens Hug	Jan 14, 2021
GSM5018806	dge1_E07 RNA-seq of ReNcell VM treated with 10 uM bx-912	SRA	Homo sapiens	1	GPL18573	GSE164788	SRA Run Selector	https://www.ncbi.nlm.nih.gov/Traces/study/?acc=SRX9834065	SRX9834065	Clemens Hug	Jan 14, 2021
GSM5018807	dge1_E08 RNA-seq of ReNcell VM treated with 1 uM bortezomib	SRA	Homo sapiens	1	GPL18573	GSE164788	SRA Run Selector	https://www.ncbi.nlm.nih.gov/Traces/study/?acc=SRX9834066	SRX9834066	Clemens Hug	Jan 14, 2021
GSM5018808	dge1_E09 RNA-seq of ReNcell VM treated with 1 uM brivanib	SRA	Homo sapiens	1	GPL18573	GSE164788	SRA Run Selector	https://www.ncbi.nlm.nih.gov/Traces/study/?acc=SRX9834067	SRX9834067	Clemens Hug	Jan 14, 2021
GSM5018809	dge1_E10 RNA-seq of ReNcell VM treated with 1 uM fedratinib	SRA	Homo sapiens	1	GPL18573	GSE164788	SRA Run Selector	https://www.ncbi.nlm.nih.gov/Traces/study/?acc=SRX9834083	SRX9834083	Clemens Hug	Jan 14, 2021
GSM5018810	dge1_E11 RNA-seq of ReNcell VM treated with 10 uM gsk1070916	SRA	Homo sapiens	1	GPL18573	GSE164788	SRA Run Selector	https://www.ncbi.nlm.nih.gov/Traces/study/?acc=SRX9834084	SRX9834084	Clemens Hug	Jan 14, 2021
GSM5018811	dge1_E12 RNA-seq of ReNcell VM treated with 1 uM hg-9-91-01	SRA	Homo sapiens	1	GPL18573	GSE164788	SRA Run Selector	https://www.ncbi.nlm.nih.gov/Traces/study/?acc=SRX9834085	SRX9834085	Clemens Hug	Jan 14, 2021
GSM5018812	dge1_E13 RNA-seq of ReNcell VM treated with lipopolysaccharide	SRA	Homo sapiens	1	GPL18573	GSE164788	SRA Run Selector	https://www.ncbi.nlm.nih.gov/Traces/study/?acc=SRX9834086	SRX9834086	Clemens Hug	Jan 14, 2021
GSM5018813	dge1_E14 RNA-seq of ReNcell VM treated with 0.3 uM a443654	SRA	Homo sapiens	1	GPL18573	GSE164788	SRA Run Selector	https://www.ncbi.nlm.nih.gov/Traces/study/?acc=SRX9834322	SRX9834322	Clemens Hug	Jan 14, 2021
GSM5018814	dge1_E15 RNA-seq of ReNcell VM treated with 1 uM tofacitinib	SRA	Homo sapiens	1	GPL18573	GSE164788	SRA Run Selector	https://www.ncbi.nlm.nih.gov/Traces/study/?acc=SRX9834339	SRX9834339	Clemens Hug	Jan 14, 2021
GSM5018815	dge1_E16 RNA-seq of ReNcell VM treated with 1 uM r 59-022	SRA	Homo sapiens	1	GPL18573	GSE164788	SRA Run Selector	https://www.ncbi.nlm.nih.gov/Traces/study/?acc=SRX9834340	SRX9834340	Clemens Hug	Jan 14, 2021
GSM5018816	dge1_E17 RNA-seq of ReNcell VM treated with 10 uM rotenone	SRA	Homo sapiens	1	GPL18573	GSE164788	SRA Run Selector	https://www.ncbi.nlm.nih.gov/Traces/study/?acc=SRX9834341	SRX9834341	Clemens Hug	Jan 14, 2021
GSM5018817	dge1_E18 RNA-seq of ReNcell VM treated with 1 uM entinostat	SRA	Homo sapiens	1	GPL18573	GSE164788	SRA Run Selector	https://www.ncbi.nlm.nih.gov/Traces/study/?acc=SRX9834342	SRX9834342	Clemens Hug	Jan 14, 2021
GSM5018818	dge1_E19 RNA-seq of ReNcell VM treated with 10 uM ruxolitinib	SRA	Homo sapiens	1	GPL18573	GSE164788	SRA Run Selector	https://www.ncbi.nlm.nih.gov/Traces/study/?acc=SRX9834343	SRX9834343	Clemens Hug	Jan 14, 2021
GSM5018819	dge1_E20 RNA-seq of ReNcell VM treated with 3 uM r 59-022	SRA	Homo sapiens	1	GPL18573	GSE164788	SRA Run Selector	https://www.ncbi.nlm.nih.gov/Traces/study/?acc=SRX9834344	SRX9834344	Clemens Hug	Jan 14, 2021
GSM5018820	dge1_E21 RNA-seq of ReNcell VM treated with 1 uM sb202190	SRA	Homo sapiens	1	GPL18573	GSE164788	SRA Run Selector	https://www.ncbi.nlm.nih.gov/Traces/study/?acc=SRX9834392	SRX9834392	Clemens Hug	Jan 14, 2021
GSM5018821	dge1_E22 RNA-seq of ReNcell VM treated with 10 uM fccp	SRA	Homo sapiens	1	GPL18573	GSE164788	SRA Run Selector	https://www.ncbi.nlm.nih.gov/Traces/study/?acc=SRX9834393	SRX9834393	Clemens Hug	Jan 14, 2021
GSM5018822	dge1_E23 RNA-seq of ReNcell VM treated with 10 uM sb202190	SRA	Homo sapiens	1	GPL18573	GSE164788	SRA Run Selector	https://www.ncbi.nlm.nih.gov/Traces/study/?acc=SRX9834358	SRX9834358	Clemens Hug	Jan 14, 2021
GSM5018823	dge1_E24 RNA-seq of ReNcell VM treated with 10 uM a443654	SRA	Homo sapiens	1	GPL18573	GSE164788	SRA Run Selector	https://www.ncbi.nlm.nih.gov/Traces/study/?acc=SRX9834359	SRX9834359	Clemens Hug	Jan 14, 2021
GSM5018824	dge1_F01 RNA-seq of ReNcell VM treated with 3 uM ruxolitinib	SRA	Homo sapiens	1	GPL18573	GSE164788	SRA Run Selector	https://www.ncbi.nlm.nih.gov/Traces/study/?acc=SRX9834361	SRX9834361	Clemens Hug	Jan 14, 2021
GSM5018825	dge1_F02 RNA-seq of ReNcell VM treated with 10 uM zm-447439	SRA	Homo sapiens	1	GPL18573	GSE164788	SRA Run Selector	https://www.ncbi.nlm.nih.gov/Traces/study/?acc=SRX9834377	SRX9834377	Clemens Hug	Jan 14, 2021
GSM5018826	dge1_F03 RNA-seq of ReNcell VM treated with 0.3 uM pha-665752	SRA	Homo sapiens	1	GPL18573	GSE164788	SRA Run Selector	https://www.ncbi.nlm.nih.gov/Traces/study/?acc=SRX9834378	SRX9834378	Clemens Hug	Jan 14, 2021
GSM5018827	dge1_F04 RNA-seq of ReNcell VM treated with 1 uM gsk1059615	SRA	Homo sapiens	1	GPL18573	GSE164788	SRA Run Selector	https://www.ncbi.nlm.nih.gov/Traces/study/?acc=SRX9834379	SRX9834379	Clemens Hug	Jan 14, 2021
GSM5018828	dge1_F05 RNA-seq of ReNcell VM treated with 0.3 uM cabozantinib	SRA	Homo sapiens	1	GPL18573	GSE164788	SRA Run Selector	https://www.ncbi.nlm.nih.gov/Traces/study/?acc=SRX9834380	SRX9834380	Clemens Hug	Jan 14, 2021
GSM5018829	dge1_F06 RNA-seq of ReNcell VM treated with 3 uM kw2449	SRA	Homo sapiens	1	GPL18573	GSE164788	SRA Run Selector	https://www.ncbi.nlm.nih.gov/Traces/study/?acc=SRX9834381	SRX9834381	Clemens Hug	Jan 14, 2021
GSM5018830	dge1_F07 RNA-seq of ReNcell VM treated with 1 uM hg-9-91-01	SRA	Homo sapiens	1	GPL18573	GSE164788	SRA Run Selector	https://www.ncbi.nlm.nih.gov/Traces/study/?acc=SRX9834382	SRX9834382	Clemens Hug	Jan 14, 2021
GSM5018831	dge1_F08 RNA-seq of ReNcell VM treated with 3 uM (+)-jq1	SRA	Homo sapiens	1	GPL18573	GSE164788	SRA Run Selector	https://www.ncbi.nlm.nih.gov/Traces/study/?acc=SRX9834383	SRX9834383	Clemens Hug	Jan 14, 2021
GSM5018832	dge1_F09 RNA-seq of ReNcell VM treated with 1 uM zm-447439	SRA	Homo sapiens	1	GPL18573	GSE164788	SRA Run Selector	https://www.ncbi.nlm.nih.gov/Traces/study/?acc=SRX9834479	SRX9834479	Clemens Hug	Jan 14, 2021
GSM5018833	dge1_F10 RNA-seq of ReNcell VM treated with 1 uM ldn-193189	SRA	Homo sapiens	1	GPL18573	GSE164788	SRA Run Selector	https://www.ncbi.nlm.nih.gov/Traces/study/?acc=SRX9834480	SRX9834480	Clemens Hug	Jan 14, 2021
GSM5018834	dge1_F11 RNA-seq of ReNcell VM treated with dmso	SRA	Homo sapiens	1	GPL18573	GSE164788	SRA Run Selector	https://www.ncbi.nlm.nih.gov/Traces/study/?acc=SRX9834482	SRX9834482	Clemens Hug	Jan 14, 2021
GSM5018835	dge1_F12 RNA-seq of ReNcell VM treated with 0.3 uM r 59949	SRA	Homo sapiens	1	GPL18573	GSE164788	SRA Run Selector	https://www.ncbi.nlm.nih.gov/Traces/study/?acc=SRX9834483	SRX9834483	Clemens Hug	Jan 14, 2021
GSM5018837	dge1_F13 RNA-seq of ReNcell VM treated with 0.3 uM r 59949	SRA	Homo sapiens	1	GPL18573	GSE164788	SRA Run Selector	https://www.ncbi.nlm.nih.gov/Traces/study/?acc=SRX9834484	SRX9834484	Clemens Hug	Jan 14, 2021
GSM5018839	dge1_F14 RNA-seq of ReNcell VM treated with 1 uM rotenone	SRA	Homo sapiens	1	GPL18573	GSE164788	SRA Run Selector	https://www.ncbi.nlm.nih.gov/Traces/study/?acc=SRX9834485	SRX9834485	Clemens Hug	Jan 14, 2021
GSM5018841	dge1_F15 RNA-seq of ReNcell VM treated with 0.3 uM hg-9-91-01	SRA	Homo sapiens	1	GPL18573	GSE164788	SRA Run Selector	https://www.ncbi.nlm.nih.gov/Traces/study/?acc=SRX9834486	SRX9834486	Clemens Hug	Jan 14, 2021
GSM5018843	dge1_F16 RNA-seq of ReNcell VM treated with 10 uM alisertib	SRA	Homo sapiens	1	GPL18573	GSE164788	SRA Run Selector	https://www.ncbi.nlm.nih.gov/Traces/study/?acc=SRX9834487	SRX9834487	Clemens Hug	Jan 14, 2021
GSM5018845	dge1_F17 RNA-seq of ReNcell VM treated with 1 uM (+)-jq1	SRA	Homo sapiens	1	GPL18573	GSE164788	SRA Run Selector	https://www.ncbi.nlm.nih.gov/Traces/study/?acc=SRX9834497	SRX9834497	Clemens Hug	Jan 14, 2021
GSM5018847	dge1_F18 RNA-seq of ReNcell VM treated with 1 uM gsk1070916	SRA	Homo sapiens	1	GPL18573	GSE164788	SRA Run Selector	https://www.ncbi.nlm.nih.gov/Traces/study/?acc=SRX9834488	SRX9834488	Clemens Hug	Jan 14, 2021
GSM5018849	dge1_F19 RNA-seq of ReNcell VM treated with 3 uM r 59-022	SRA	Homo sapiens	1	GPL18573	GSE164788	SRA Run Selector	https://www.ncbi.nlm.nih.gov/Traces/study/?acc=SRX9834489	SRX9834489	Clemens Hug	Jan 14, 2021
GSM5018851	dge1_F20 RNA-seq of ReNcell VM treated with 10 uM fccp	SRA	Homo sapiens	1	GPL18573	GSE164788	SRA Run Selector	https://www.ncbi.nlm.nih.gov/Traces/study/?acc=SRX9834490	SRX9834490	Clemens Hug	Jan 14, 2021
GSM5018853	dge1_F21 RNA-seq of ReNcell VM treated with 0.3 uM r 59-022	SRA	Homo sapiens	1	GPL18573	GSE164788	SRA Run Selector	https://www.ncbi.nlm.nih.gov/Traces/study/?acc=SRX9834492	SRX9834492	Clemens Hug	Jan 14, 2021
GSM5018855	dge1_F22 RNA-seq of ReNcell VM treated with 1 uM hg-9-91-01	SRA	Homo sapiens	1	GPL18573	GSE164788	SRA Run Selector	https://www.ncbi.nlm.nih.gov/Traces/study/?acc=SRX9834493	SRX9834493	Clemens Hug	Jan 14, 2021
GSM5018857	dge1_F23 RNA-seq of ReNcell VM treated with 0.3 uM pf04217903	SRA	Homo sapiens	1	GPL18573	GSE164788	SRA Run Selector	https://www.ncbi.nlm.nih.gov/Traces/study/?acc=SRX9834494	SRX9834494	Clemens Hug	Jan 14, 2021
GSM5018858	dge1_F24 RNA-seq of ReNcell VM treated with 1 uM mg-132	SRA	Homo sapiens	1	GPL18573	GSE164788	SRA Run Selector	https://www.ncbi.nlm.nih.gov/Traces/study/?acc=SRX9834495	SRX9834495	Clemens Hug	Jan 14, 2021
GSM5018860	dge1_G01 RNA-seq of ReNcell VM treated with 1 uM sb202190	SRA	Homo sapiens	1	GPL18573	GSE164788	SRA Run Selector	https://www.ncbi.nlm.nih.gov/Traces/study/?acc=SRX9834496	SRX9834496	Clemens Hug	Jan 14, 2021
GSM5018861	dge1_G02 RNA-seq of ReNcell VM treated with 10 uM bx-912	SRA	Homo sapiens	1	GPL18573	GSE164788	SRA Run Selector	https://www.ncbi.nlm.nih.gov/Traces/study/?acc=SRX9834498	SRX9834498	Clemens Hug	Jan 14, 2021
GSM5018862	dge1_G03 RNA-seq of ReNcell VM treated with 3 uM r 59949	SRA	Homo sapiens	1	GPL18573	GSE164788	SRA Run Selector	https://www.ncbi.nlm.nih.gov/Traces/study/?acc=SRX9834506	SRX9834506	Clemens Hug	Jan 14, 2021
GSM5018863	dge1_G04 RNA-seq of ReNcell VM treated with 10 uM gsk1070916	SRA	Homo sapiens	1	GPL18573	GSE164788	SRA Run Selector	https://www.ncbi.nlm.nih.gov/Traces/study/?acc=SRX9834507	SRX9834507	Clemens Hug	Jan 14, 2021
GSM5018864	dge1_G05 RNA-seq of ReNcell VM treated with 1 uM entinostat	SRA	Homo sapiens	1	GPL18573	GSE164788	SRA Run Selector	https://www.ncbi.nlm.nih.gov/Traces/study/?acc=SRX9834508	SRX9834508	Clemens Hug	Jan 14, 2021
GSM5018865	dge1_G06 RNA-seq of ReNcell VM treated with 10 uM r 59-022	SRA	Homo sapiens	1	GPL18573	GSE164788	SRA Run Selector	https://www.ncbi.nlm.nih.gov/Traces/study/?acc=SRX9834509	SRX9834509	Clemens Hug	Jan 14, 2021
GSM5018866	dge1_G07 RNA-seq of ReNcell VM treated with 0.3 uM sb202190	SRA	Homo sapiens	1	GPL18573	GSE164788	SRA Run Selector	https://www.ncbi.nlm.nih.gov/Traces/study/?acc=SRX9834511	SRX9834511	Clemens Hug	Jan 14, 2021
GSM5018867	dge1_G08 RNA-seq of ReNcell VM treated with 3 uM bortezomib	SRA	Homo sapiens	1	GPL18573	GSE164788	SRA Run Selector	https://www.ncbi.nlm.nih.gov/Traces/study/?acc=SRX9834512	SRX9834512	Clemens Hug	Jan 14, 2021
GSM5018868	dge1_G09 RNA-seq of ReNcell VM treated with 3 uM sb202190	SRA	Homo sapiens	1	GPL18573	GSE164788	SRA Run Selector	https://www.ncbi.nlm.nih.gov/Traces/study/?acc=SRX9834513	SRX9834513	Clemens Hug	Jan 14, 2021
GSM5018869	dge1_G10 RNA-seq of ReNcell VM treated with 10 uM hg-9-91-01	SRA	Homo sapiens	1	GPL18573	GSE164788	SRA Run Selector	https://www.ncbi.nlm.nih.gov/Traces/study/?acc=SRX9834528	SRX9834528	Clemens Hug	Jan 14, 2021
GSM5018870	dge1_G11 RNA-seq of ReNcell VM treated with 1 uM metformin	SRA	Homo sapiens	1	GPL18573	GSE164788	SRA Run Selector	https://www.ncbi.nlm.nih.gov/Traces/study/?acc=SRX9834529	SRX9834529	Clemens Hug	Jan 14, 2021
GSM5018871	dge1_G12 RNA-seq of ReNcell VM treated with 10 uM entinostat	SRA	Homo sapiens	1	GPL18573	GSE164788	SRA Run Selector	https://www.ncbi.nlm.nih.gov/Traces/study/?acc=SRX9834530	SRX9834530	Clemens Hug	Jan 14, 2021
GSM5018872	dge1_G13 RNA-seq of ReNcell VM treated with 3 uM fedratinib	SRA	Homo sapiens	1	GPL18573	GSE164788	SRA Run Selector	https://www.ncbi.nlm.nih.gov/Traces/study/?acc=SRX9834531	SRX9834531	Clemens Hug	Jan 14, 2021
GSM5018873	dge1_G14 RNA-seq of ReNcell VM treated with 10 uM cabozantinib	SRA	Homo sapiens	1	GPL18573	GSE164788	SRA Run Selector	https://www.ncbi.nlm.nih.gov/Traces/study/?acc=SRX9834532	SRX9834532	Clemens Hug	Jan 14, 2021
GSM5018874	dge1_G15 RNA-seq of ReNcell VM treated with lipofectamine	SRA	Homo sapiens	1	GPL18573	GSE164788	SRA Run Selector	https://www.ncbi.nlm.nih.gov/Traces/study/?acc=SRX9834533	SRX9834533	Clemens Hug	Jan 14, 2021
GSM5018875	dge1_G16 RNA-seq of ReNcell VM treated with 10 uM a443654	SRA	Homo sapiens	1	GPL18573	GSE164788	SRA Run Selector	https://www.ncbi.nlm.nih.gov/Traces/study/?acc=SRX9834534	SRX9834534	Clemens Hug	Jan 14, 2021
GSM5018876	dge1_G17 RNA-seq of ReNcell VM treated with 0.3 uM gsk1059615	SRA	Homo sapiens	1	GPL18573	GSE164788	SRA Run Selector	https://www.ncbi.nlm.nih.gov/Traces/study/?acc=SRX9834552	SRX9834552	Clemens Hug	Jan 14, 2021
GSM5018877	dge1_G18 RNA-seq of ReNcell VM treated with 10 uM tofacitinib	SRA	Homo sapiens	1	GPL18573	GSE164788	SRA Run Selector	https://www.ncbi.nlm.nih.gov/Traces/study/?acc=SRX9834541	SRX9834541	Clemens Hug	Jan 14, 2021
GSM5018878	dge1_G19 RNA-seq of ReNcell VM treated with 10 uM bortezomib	SRA	Homo sapiens	1	GPL18573	GSE164788	SRA Run Selector	https://www.ncbi.nlm.nih.gov/Traces/study/?acc=SRX9834542	SRX9834542	Clemens Hug	Jan 14, 2021
GSM5018879	dge1_G20 RNA-seq of ReNcell VM treated with 3 uM tofacitinib	SRA	Homo sapiens	1	GPL18573	GSE164788	SRA Run Selector	https://www.ncbi.nlm.nih.gov/Traces/study/?acc=SRX9834543	SRX9834543	Clemens Hug	Jan 14, 2021
GSM5018880	dge1_G21 RNA-seq of ReNcell VM treated with 10 uM pf04217903	SRA	Homo sapiens	1	GPL18573	GSE164788	SRA Run Selector	https://www.ncbi.nlm.nih.gov/Traces/study/?acc=SRX9834544	SRX9834544	Clemens Hug	Jan 14, 2021
GSM5018881	dge1_G22 RNA-seq of ReNcell VM treated with 3 uM pha-665752	SRA	Homo sapiens	1	GPL18573	GSE164788	SRA Run Selector	https://www.ncbi.nlm.nih.gov/Traces/study/?acc=SRX9833947	SRX9833947	Clemens Hug	Jan 14, 2021
GSM5018882	dge1_G23 RNA-seq of ReNcell VM treated with 10 uM pazopanib	SRA	Homo sapiens	1	GPL18573	GSE164788	SRA Run Selector	https://www.ncbi.nlm.nih.gov/Traces/study/?acc=SRX9833948	SRX9833948	Clemens Hug	Jan 14, 2021
GSM5018883	dge1_G24 RNA-seq of ReNcell VM treated with dmso	SRA	Homo sapiens	1	GPL18573	GSE164788	SRA Run Selector	https://www.ncbi.nlm.nih.gov/Traces/study/?acc=SRX9833949	SRX9833949	Clemens Hug	Jan 14, 2021
GSM5018884	dge1_H01 RNA-seq of ReNcell VM treated with 1 uM sb202190	SRA	Homo sapiens	1	GPL18573	GSE164788	SRA Run Selector	https://www.ncbi.nlm.nih.gov/Traces/study/?acc=SRX9833950	SRX9833950	Clemens Hug	Jan 14, 2021
GSM5018885	dge1_H02 RNA-seq of ReNcell VM treated with 1 uM nvp-tae684	SRA	Homo sapiens	1	GPL18573	GSE164788	SRA Run Selector	https://www.ncbi.nlm.nih.gov/Traces/study/?acc=SRX9833951	SRX9833951	Clemens Hug	Jan 14, 2021
GSM5018886	dge1_H03 RNA-seq of ReNcell VM treated with 10 uM fedratinib	SRA	Homo sapiens	1	GPL18573	GSE164788	SRA Run Selector	https://www.ncbi.nlm.nih.gov/Traces/study/?acc=SRX9833970	SRX9833970	Clemens Hug	Jan 14, 2021
GSM5018887	dge1_H04 RNA-seq of ReNcell VM treated with 3 uM alisertib	SRA	Homo sapiens	1	GPL18573	GSE164788	SRA Run Selector	https://www.ncbi.nlm.nih.gov/Traces/study/?acc=SRX9833960	SRX9833960	Clemens Hug	Jan 14, 2021
GSM5018888	dge1_H05 RNA-seq of ReNcell VM treated with 3 uM a443654	SRA	Homo sapiens	1	GPL18573	GSE164788	SRA Run Selector	https://www.ncbi.nlm.nih.gov/Traces/study/?acc=SRX9833961	SRX9833961	Clemens Hug	Jan 14, 2021
GSM5018889	dge1_H06 RNA-seq of ReNcell VM treated with 3 uM metformin	SRA	Homo sapiens	1	GPL18573	GSE164788	SRA Run Selector	https://www.ncbi.nlm.nih.gov/Traces/study/?acc=SRX9833962	SRX9833962	Clemens Hug	Jan 14, 2021
GSM5018890	dge1_H07 RNA-seq of ReNcell VM treated with 3 uM pha-665752	SRA	Homo sapiens	1	GPL18573	GSE164788	SRA Run Selector	https://www.ncbi.nlm.nih.gov/Traces/study/?acc=SRX9833963	SRX9833963	Clemens Hug	Jan 14, 2021
GSM5018891	dge1_H08 RNA-seq of ReNcell VM treated with 0.3 uM brivanib	SRA	Homo sapiens	1	GPL18573	GSE164788	SRA Run Selector	https://www.ncbi.nlm.nih.gov/Traces/study/?acc=SRX9833964	SRX9833964	Clemens Hug	Jan 14, 2021
GSM5018892	dge1_H09 RNA-seq of ReNcell VM treated with dmso	SRA	Homo sapiens	1	GPL18573	GSE164788	SRA Run Selector	https://www.ncbi.nlm.nih.gov/Traces/study/?acc=SRX9833965	SRX9833965	Clemens Hug	Jan 14, 2021
GSM5018893	dge1_H10 RNA-seq of ReNcell VM treated with 1 uM pf04217903	SRA	Homo sapiens	1	GPL18573	GSE164788	SRA Run Selector	https://www.ncbi.nlm.nih.gov/Traces/study/?acc=SRX9833966	SRX9833966	Clemens Hug	Jan 14, 2021
GSM5018894	dge1_H11 RNA-seq of ReNcell VM treated with 1 uM zm-447439	SRA	Homo sapiens	1	GPL18573	GSE164788	SRA Run Selector	https://www.ncbi.nlm.nih.gov/Traces/study/?acc=SRX9833967	SRX9833967	Clemens Hug	Jan 14, 2021
GSM5018895	dge1_H12 RNA-seq of ReNcell VM treated with 3 uM ruxolitinib	SRA	Homo sapiens	1	GPL18573	GSE164788	SRA Run Selector	https://www.ncbi.nlm.nih.gov/Traces/study/?acc=SRX9833976	SRX9833976	Clemens Hug	Jan 14, 2021
GSM5018896	dge1_H13 RNA-seq of ReNcell VM treated with 1 uM ruxolitinib	SRA	Homo sapiens	1	GPL18573	GSE164788	SRA Run Selector	https://www.ncbi.nlm.nih.gov/Traces/study/?acc=SRX9833978	SRX9833978	Clemens Hug	Jan 14, 2021
GSM5018897	dge1_H14 RNA-seq of ReNcell VM treated with 3 uM bortezomib	SRA	Homo sapiens	1	GPL18573	GSE164788	SRA Run Selector	https://www.ncbi.nlm.nih.gov/Traces/study/?acc=SRX9833979	SRX9833979	Clemens Hug	Jan 14, 2021
GSM5018898	dge1_H15 RNA-seq of ReNcell VM treated with 10 uM metformin	SRA	Homo sapiens	1	GPL18573	GSE164788	SRA Run Selector	https://www.ncbi.nlm.nih.gov/Traces/study/?acc=SRX9833980	SRX9833980	Clemens Hug	Jan 14, 2021
GSM5018899	dge1_H16 RNA-seq of ReNcell VM treated with 10 uM r 59949	SRA	Homo sapiens	1	GPL18573	GSE164788	SRA Run Selector	https://www.ncbi.nlm.nih.gov/Traces/study/?acc=SRX9833981	SRX9833981	Clemens Hug	Jan 14, 2021
GSM5018900	dge1_H17 RNA-seq of ReNcell VM treated with 0.3 uM entinostat	SRA	Homo sapiens	1	GPL18573	GSE164788	SRA Run Selector	https://www.ncbi.nlm.nih.gov/Traces/study/?acc=SRX9833982	SRX9833982	Clemens Hug	Jan 14, 2021
GSM5018901	dge1_H18 RNA-seq of ReNcell VM treated with 0.3 uM bortezomib	SRA	Homo sapiens	1	GPL18573	GSE164788	SRA Run Selector	https://www.ncbi.nlm.nih.gov/Traces/study/?acc=SRX9834009	SRX9834009	Clemens Hug	Jan 14, 2021
GSM5018902	dge1_H19 RNA-seq of ReNcell VM treated with 10 uM gsk1059615	SRA	Homo sapiens	1	GPL18573	GSE164788	SRA Run Selector	https://www.ncbi.nlm.nih.gov/Traces/study/?acc=SRX9834010	SRX9834010	Clemens Hug	Jan 14, 2021
GSM5018903	dge1_H20 RNA-seq of ReNcell VM treated with 1 uM ldn-193189	SRA	Homo sapiens	1	GPL18573	GSE164788	SRA Run Selector	https://www.ncbi.nlm.nih.gov/Traces/study/?acc=SRX9833987	SRX9833987	Clemens Hug	Jan 14, 2021
GSM5018904	dge1_H21 RNA-seq of ReNcell VM treated with 10 uM cabozantinib	SRA	Homo sapiens	1	GPL18573	GSE164788	SRA Run Selector	https://www.ncbi.nlm.nih.gov/Traces/study/?acc=SRX9833988	SRX9833988	Clemens Hug	Jan 14, 2021
GSM5018905	dge1_H22 RNA-seq of ReNcell VM treated with 3 uM fedratinib	SRA	Homo sapiens	1	GPL18573	GSE164788	SRA Run Selector	https://www.ncbi.nlm.nih.gov/Traces/study/?acc=SRX9833989	SRX9833989	Clemens Hug	Jan 14, 2021
GSM5018906	dge1_H23 RNA-seq of ReNcell VM treated with 0.3 uM entinostat	SRA	Homo sapiens	1	GPL18573	GSE164788	SRA Run Selector	https://www.ncbi.nlm.nih.gov/Traces/study/?acc=SRX9833991	SRX9833991	Clemens Hug	Jan 14, 2021
GSM5018907	dge1_H24 RNA-seq of ReNcell VM treated with 1 uM a443654	SRA	Homo sapiens	1	GPL18573	GSE164788	SRA Run Selector	https://www.ncbi.nlm.nih.gov/Traces/study/?acc=SRX9834237	SRX9834237	Clemens Hug	Jan 14, 2021
GSM5018908	dge1_I01 RNA-seq of ReNcell VM treated with 10 uM cabozantinib	SRA	Homo sapiens	1	GPL18573	GSE164788	SRA Run Selector	https://www.ncbi.nlm.nih.gov/Traces/study/?acc=SRX9834238	SRX9834238	Clemens Hug	Jan 14, 2021
GSM5018909	dge1_I02 RNA-seq of ReNcell VM treated with 1 uM kw2449	SRA	Homo sapiens	1	GPL18573	GSE164788	SRA Run Selector	https://www.ncbi.nlm.nih.gov/Traces/study/?acc=SRX9834239	SRX9834239	Clemens Hug	Jan 14, 2021
GSM5018910	dge1_I03 RNA-seq of ReNcell VM treated with 0.3 uM brivanib	SRA	Homo sapiens	1	GPL18573	GSE164788	SRA Run Selector	https://www.ncbi.nlm.nih.gov/Traces/study/?acc=SRX9834240	SRX9834240	Clemens Hug	Jan 14, 2021
GSM5018911	dge1_I04 RNA-seq of ReNcell VM treated with 3 uM nvp-tae684	SRA	Homo sapiens	1	GPL18573	GSE164788	SRA Run Selector	https://www.ncbi.nlm.nih.gov/Traces/study/?acc=SRX9834166	SRX9834166	Clemens Hug	Jan 14, 2021
GSM5018912	dge1_I05 RNA-seq of ReNcell VM treated with 3 uM gsk1070916	SRA	Homo sapiens	1	GPL18573	GSE164788	SRA Run Selector	https://www.ncbi.nlm.nih.gov/Traces/study/?acc=SRX9834167	SRX9834167	Clemens Hug	Jan 14, 2021
GSM5018913	dge1_I06 RNA-seq of ReNcell VM treated with 0.3 uM brivanib	SRA	Homo sapiens	1	GPL18573	GSE164788	SRA Run Selector	https://www.ncbi.nlm.nih.gov/Traces/study/?acc=SRX9834190	SRX9834190	Clemens Hug	Jan 14, 2021
GSM5018914	dge1_I07 RNA-seq of ReNcell VM treated with 0.3 uM torin1	SRA	Homo sapiens	1	GPL18573	GSE164788	SRA Run Selector	https://www.ncbi.nlm.nih.gov/Traces/study/?acc=SRX9834191	SRX9834191	Clemens Hug	Jan 14, 2021
GSM5018915	dge1_I08 RNA-seq of ReNcell VM treated with 0.3 uM pha-665752	SRA	Homo sapiens	1	GPL18573	GSE164788	SRA Run Selector	https://www.ncbi.nlm.nih.gov/Traces/study/?acc=SRX9834192	SRX9834192	Clemens Hug	Jan 14, 2021
GSM5018916	dge1_I09 RNA-seq of ReNcell VM treated with 0.3 uM barasertib	SRA	Homo sapiens	1	GPL18573	GSE164788	SRA Run Selector	https://www.ncbi.nlm.nih.gov/Traces/study/?acc=SRX9834195	SRX9834195	Clemens Hug	Jan 14, 2021
GSM5018917	dge1_I10 RNA-seq of ReNcell VM treated with 3 uM sb202190	SRA	Homo sapiens	1	GPL18573	GSE164788	SRA Run Selector	https://www.ncbi.nlm.nih.gov/Traces/study/?acc=SRX9834196	SRX9834196	Clemens Hug	Jan 14, 2021
GSM5018918	dge1_I11 RNA-seq of ReNcell VM treated with 1 uM kw2449	SRA	Homo sapiens	1	GPL18573	GSE164788	SRA Run Selector	https://www.ncbi.nlm.nih.gov/Traces/study/?acc=SRX9834197	SRX9834197	Clemens Hug	Jan 14, 2021
GSM5018919	dge1_I12 RNA-seq of ReNcell VM treated with 1 uM fccp	SRA	Homo sapiens	1	GPL18573	GSE164788	SRA Run Selector	https://www.ncbi.nlm.nih.gov/Traces/study/?acc=SRX9834207	SRX9834207	Clemens Hug	Jan 14, 2021
GSM5018920	dge1_I13 RNA-seq of ReNcell VM treated with 3 uM ldn-193189	SRA	Homo sapiens	1	GPL18573	GSE164788	SRA Run Selector	https://www.ncbi.nlm.nih.gov/Traces/study/?acc=SRX9834208	SRX9834208	Clemens Hug	Jan 14, 2021
GSM5018921	dge1_I14 RNA-seq of ReNcell VM treated with 3 uM ldn-193189	SRA	Homo sapiens	1	GPL18573	GSE164788	SRA Run Selector	https://www.ncbi.nlm.nih.gov/Traces/study/?acc=SRX9834209	SRX9834209	Clemens Hug	Jan 14, 2021
GSM5018922	dge1_I15 RNA-seq of ReNcell VM treated with 10 uM (+)-jq1	SRA	Homo sapiens	1	GPL18573	GSE164788	SRA Run Selector	https://www.ncbi.nlm.nih.gov/Traces/study/?acc=SRX9834210	SRX9834210	Clemens Hug	Jan 14, 2021
GSM5018923	dge1_I16 RNA-seq of ReNcell VM treated with 10 uM nvp-tae684	SRA	Homo sapiens	1	GPL18573	GSE164788	SRA Run Selector	https://www.ncbi.nlm.nih.gov/Traces/study/?acc=SRX9834211	SRX9834211	Clemens Hug	Jan 14, 2021
GSM5018924	dge1_I17 RNA-seq of ReNcell VM treated with 3 uM entinostat	SRA	Homo sapiens	1	GPL18573	GSE164788	SRA Run Selector	https://www.ncbi.nlm.nih.gov/Traces/study/?acc=SRX9834212	SRX9834212	Clemens Hug	Jan 14, 2021
GSM5018925	dge1_I18 RNA-seq of ReNcell VM treated with 10 uM nvp-tae684	SRA	Homo sapiens	1	GPL18573	GSE164788	SRA Run Selector	https://www.ncbi.nlm.nih.gov/Traces/study/?acc=SRX9834213	SRX9834213	Clemens Hug	Jan 14, 2021
GSM5018926	dge1_I19 RNA-seq of ReNcell VM treated with 3 uM a443654	SRA	Homo sapiens	1	GPL18573	GSE164788	SRA Run Selector	https://www.ncbi.nlm.nih.gov/Traces/study/?acc=SRX9834227	SRX9834227	Clemens Hug	Jan 14, 2021
GSM5018927	dge1_I20 RNA-seq of ReNcell VM treated with 1 uM cabozantinib	SRA	Homo sapiens	1	GPL18573	GSE164788	SRA Run Selector	https://www.ncbi.nlm.nih.gov/Traces/study/?acc=SRX9834228	SRX9834228	Clemens Hug	Jan 14, 2021
GSM5018928	dge1_I21 RNA-seq of ReNcell VM treated with 10 uM bortezomib	SRA	Homo sapiens	1	GPL18573	GSE164788	SRA Run Selector	https://www.ncbi.nlm.nih.gov/Traces/study/?acc=SRX9834229	SRX9834229	Clemens Hug	Jan 14, 2021
GSM5018929	dge1_I22 RNA-seq of ReNcell VM treated with 0.3 uM ldn-193189	SRA	Homo sapiens	1	GPL18573	GSE164788	SRA Run Selector	https://www.ncbi.nlm.nih.gov/Traces/study/?acc=SRX9834230	SRX9834230	Clemens Hug	Jan 14, 2021
GSM5018930	dge1_I23 RNA-seq of ReNcell VM treated with 10 uM fedratinib	SRA	Homo sapiens	1	GPL18573	GSE164788	SRA Run Selector	https://www.ncbi.nlm.nih.gov/Traces/study/?acc=SRX9834231	SRX9834231	Clemens Hug	Jan 14, 2021
GSM5018931	dge1_I24 RNA-seq of ReNcell VM treated with 0.3 uM pazopanib	SRA	Homo sapiens	1	GPL18573	GSE164788	SRA Run Selector	https://www.ncbi.nlm.nih.gov/Traces/study/?acc=SRX9834232	SRX9834232	Clemens Hug	Jan 14, 2021
GSM5018932	dge1_J01 RNA-seq of ReNcell VM treated with 1 uM pha-665752	SRA	Homo sapiens	1	GPL18573	GSE164788	SRA Run Selector	https://www.ncbi.nlm.nih.gov/Traces/study/?acc=SRX9834308	SRX9834308	Clemens Hug	Jan 14, 2021
GSM5018933	dge1_J02 RNA-seq of ReNcell VM treated with 1 uM plx-4720	SRA	Homo sapiens	1	GPL18573	GSE164788	SRA Run Selector	https://www.ncbi.nlm.nih.gov/Traces/study/?acc=SRX9834309	SRX9834309	Clemens Hug	Jan 14, 2021
GSM5018934	dge1_J03 RNA-seq of ReNcell VM treated with dsRNA + lipofectamine	SRA	Homo sapiens	1	GPL18573	GSE164788	SRA Run Selector	https://www.ncbi.nlm.nih.gov/Traces/study/?acc=SRX9834310	SRX9834310	Clemens Hug	Jan 14, 2021
GSM5018935	dge1_J04 RNA-seq of ReNcell VM treated with 3 uM hg-9-91-01	SRA	Homo sapiens	1	GPL18573	GSE164788	SRA Run Selector	https://www.ncbi.nlm.nih.gov/Traces/study/?acc=SRX9834311	SRX9834311	Clemens Hug	Jan 14, 2021
GSM5018936	dge1_J05 RNA-seq of ReNcell VM treated with 0.3 uM fedratinib	SRA	Homo sapiens	1	GPL18573	GSE164788	SRA Run Selector	https://www.ncbi.nlm.nih.gov/Traces/study/?acc=SRX9834251	SRX9834251	Clemens Hug	Jan 14, 2021
GSM5018937	dge1_J06 RNA-seq of ReNcell VM treated with 1 uM kw2449	SRA	Homo sapiens	1	GPL18573	GSE164788	SRA Run Selector	https://www.ncbi.nlm.nih.gov/Traces/study/?acc=SRX9834252	SRX9834252	Clemens Hug	Jan 14, 2021
GSM5018938	dge1_J07 RNA-seq of ReNcell VM treated with 0.3 uM sb202190	SRA	Homo sapiens	1	GPL18573	GSE164788	SRA Run Selector	https://www.ncbi.nlm.nih.gov/Traces/study/?acc=SRX9834268	SRX9834268	Clemens Hug	Jan 14, 2021
GSM5018939	dge1_J08 RNA-seq of ReNcell VM treated with 0.3 uM zm-447439	SRA	Homo sapiens	1	GPL18573	GSE164788	SRA Run Selector	https://www.ncbi.nlm.nih.gov/Traces/study/?acc=SRX9834269	SRX9834269	Clemens Hug	Jan 14, 2021
GSM5018940	dge1_J09 RNA-seq of ReNcell VM treated with 1 uM chitosan	SRA	Homo sapiens	1	GPL18573	GSE164788	SRA Run Selector	https://www.ncbi.nlm.nih.gov/Traces/study/?acc=SRX9834270	SRX9834270	Clemens Hug	Jan 14, 2021
GSM5018941	dge1_J10 RNA-seq of ReNcell VM treated with 10 uM gsk1059615	SRA	Homo sapiens	1	GPL18573	GSE164788	SRA Run Selector	https://www.ncbi.nlm.nih.gov/Traces/study/?acc=SRX9834271	SRX9834271	Clemens Hug	Jan 14, 2021
GSM5018942	dge1_J11 RNA-seq of ReNcell VM treated with 1 uM chitosan	SRA	Homo sapiens	1	GPL18573	GSE164788	SRA Run Selector	https://www.ncbi.nlm.nih.gov/Traces/study/?acc=SRX9834272	SRX9834272	Clemens Hug	Jan 14, 2021
GSM5018943	dge1_J12 RNA-seq of ReNcell VM treated with 3 uM (+)-jq1	SRA	Homo sapiens	1	GPL18573	GSE164788	SRA Run Selector	https://www.ncbi.nlm.nih.gov/Traces/study/?acc=SRX9834273	SRX9834273	Clemens Hug	Jan 14, 2021
GSM5018944	dge1_J13 RNA-seq of ReNcell VM treated with 3 uM pf04217903	SRA	Homo sapiens	1	GPL18573	GSE164788	SRA Run Selector	https://www.ncbi.nlm.nih.gov/Traces/study/?acc=SRX9834274	SRX9834274	Clemens Hug	Jan 14, 2021
GSM5018945	dge1_J14 RNA-seq of ReNcell VM treated with 10 uM pha-665752	SRA	Homo sapiens	1	GPL18573	GSE164788	SRA Run Selector	https://www.ncbi.nlm.nih.gov/Traces/study/?acc=SRX9834290	SRX9834290	Clemens Hug	Jan 14, 2021
GSM5018946	dge1_J15 RNA-seq of ReNcell VM treated with 10 uM pha-665752	SRA	Homo sapiens	1	GPL18573	GSE164788	SRA Run Selector	https://www.ncbi.nlm.nih.gov/Traces/study/?acc=SRX9834292	SRX9834292	Clemens Hug	Jan 14, 2021
GSM5018947	dge1_J16 RNA-seq of ReNcell VM treated with 10 uM kw2449	SRA	Homo sapiens	1	GPL18573	GSE164788	SRA Run Selector	https://www.ncbi.nlm.nih.gov/Traces/study/?acc=SRX9834293	SRX9834293	Clemens Hug	Jan 14, 2021
GSM5018948	dge1_J17 RNA-seq of ReNcell VM treated with 10 uM pazopanib	SRA	Homo sapiens	1	GPL18573	GSE164788	SRA Run Selector	https://www.ncbi.nlm.nih.gov/Traces/study/?acc=SRX9834294	SRX9834294	Clemens Hug	Jan 14, 2021
GSM5018949	dge1_J18 RNA-seq of ReNcell VM treated with 10 uM fedratinib	SRA	Homo sapiens	1	GPL18573	GSE164788	SRA Run Selector	https://www.ncbi.nlm.nih.gov/Traces/study/?acc=SRX9834295	SRX9834295	Clemens Hug	Jan 14, 2021
GSM5018950	dge1_J19 RNA-seq of ReNcell VM treated with 10 uM zm-447439	SRA	Homo sapiens	1	GPL18573	GSE164788	SRA Run Selector	https://www.ncbi.nlm.nih.gov/Traces/study/?acc=SRX9834296	SRX9834296	Clemens Hug	Jan 14, 2021
GSM5018951	dge1_J20 RNA-seq of ReNcell VM treated with 1 uM pazopanib	SRA	Homo sapiens	1	GPL18573	GSE164788	SRA Run Selector	https://www.ncbi.nlm.nih.gov/Traces/study/?acc=SRX9834297	SRX9834297	Clemens Hug	Jan 14, 2021
GSM5018952	dge1_J21 RNA-seq of ReNcell VM treated with 10 uM fccp	SRA	Homo sapiens	1	GPL18573	GSE164788	SRA Run Selector	https://www.ncbi.nlm.nih.gov/Traces/study/?acc=SRX9834317	SRX9834317	Clemens Hug	Jan 14, 2021
GSM5018953	dge1_J22 RNA-seq of ReNcell VM treated with 1 uM torin1	SRA	Homo sapiens	1	GPL18573	GSE164788	SRA Run Selector	https://www.ncbi.nlm.nih.gov/Traces/study/?acc=SRX9834318	SRX9834318	Clemens Hug	Jan 14, 2021
GSM5018954	dge1_J23 RNA-seq of ReNcell VM treated with 10 uM hg-9-91-01	SRA	Homo sapiens	1	GPL18573	GSE164788	SRA Run Selector	https://www.ncbi.nlm.nih.gov/Traces/study/?acc=SRX9834319	SRX9834319	Clemens Hug	Jan 14, 2021
GSM5018955	dge1_J24 RNA-seq of ReNcell VM treated with 10 uM alisertib	SRA	Homo sapiens	1	GPL18573	GSE164788	SRA Run Selector	https://www.ncbi.nlm.nih.gov/Traces/study/?acc=SRX9834320	SRX9834320	Clemens Hug	Jan 14, 2021
GSM5018956	dge1_K01 RNA-seq of ReNcell VM treated with 0.3 uM cabozantinib	SRA	Homo sapiens	1	GPL18573	GSE164788	SRA Run Selector	https://www.ncbi.nlm.nih.gov/Traces/study/?acc=SRX9834408	SRX9834408	Clemens Hug	Jan 14, 2021
GSM5018957	dge1_K02 RNA-seq of ReNcell VM treated with 3 uM gsk1059615	SRA	Homo sapiens	1	GPL18573	GSE164788	SRA Run Selector	https://www.ncbi.nlm.nih.gov/Traces/study/?acc=SRX9834409	SRX9834409	Clemens Hug	Jan 14, 2021
GSM5018958	dge1_K03 RNA-seq of ReNcell VM treated with 0.3 uM metformin	SRA	Homo sapiens	1	GPL18573	GSE164788	SRA Run Selector	https://www.ncbi.nlm.nih.gov/Traces/study/?acc=SRX9834415	SRX9834415	Clemens Hug	Jan 14, 2021
GSM5018959	dge1_K04 RNA-seq of ReNcell VM treated with 0.3 uM zm-447439	SRA	Homo sapiens	1	GPL18573	GSE164788	SRA Run Selector	https://www.ncbi.nlm.nih.gov/Traces/study/?acc=SRX9834416	SRX9834416	Clemens Hug	Jan 14, 2021
GSM5018960	dge1_K05 RNA-seq of ReNcell VM treated with 3 uM plx-4720	SRA	Homo sapiens	1	GPL18573	GSE164788	SRA Run Selector	https://www.ncbi.nlm.nih.gov/Traces/study/?acc=SRX9834417	SRX9834417	Clemens Hug	Jan 14, 2021
GSM5018961	dge1_K06 RNA-seq of ReNcell VM treated with 10 uM ldn-193189	SRA	Homo sapiens	1	GPL18573	GSE164788	SRA Run Selector	https://www.ncbi.nlm.nih.gov/Traces/study/?acc=SRX9834418	SRX9834418	Clemens Hug	Jan 14, 2021
GSM5018962	dge1_K07 RNA-seq of ReNcell VM treated with 1 uM bx-912	SRA	Homo sapiens	1	GPL18573	GSE164788	SRA Run Selector	https://www.ncbi.nlm.nih.gov/Traces/study/?acc=SRX9834419	SRX9834419	Clemens Hug	Jan 14, 2021
GSM5018963	dge1_K08 RNA-seq of ReNcell VM treated with 1 uM torin1	SRA	Homo sapiens	1	GPL18573	GSE164788	SRA Run Selector	https://www.ncbi.nlm.nih.gov/Traces/study/?acc=SRX9834420	SRX9834420	Clemens Hug	Jan 14, 2021
GSM5018964	dge1_K09 RNA-seq of ReNcell VM treated with 1 uM gsk1070916	SRA	Homo sapiens	1	GPL18573	GSE164788	SRA Run Selector	https://www.ncbi.nlm.nih.gov/Traces/study/?acc=SRX9834421	SRX9834421	Clemens Hug	Jan 14, 2021
GSM5018965	dge1_K10 RNA-seq of ReNcell VM treated with 3 uM zm-447439	SRA	Homo sapiens	1	GPL18573	GSE164788	SRA Run Selector	https://www.ncbi.nlm.nih.gov/Traces/study/?acc=SRX9833837	SRX9833837	Clemens Hug	Jan 14, 2021
GSM5018966	dge1_K11 RNA-seq of ReNcell VM treated with 3 uM bx-912	SRA	Homo sapiens	1	GPL18573	GSE164788	SRA Run Selector	https://www.ncbi.nlm.nih.gov/Traces/study/?acc=SRX9833839	SRX9833839	Clemens Hug	Jan 14, 2021
GSM5018967	dge1_K12 RNA-seq of ReNcell VM treated with dmso	SRA	Homo sapiens	1	GPL18573	GSE164788	SRA Run Selector	https://www.ncbi.nlm.nih.gov/Traces/study/?acc=SRX9833840	SRX9833840	Clemens Hug	Jan 14, 2021
GSM5018968	dge1_K13 RNA-seq of ReNcell VM treated with 0.3 uM bortezomib	SRA	Homo sapiens	1	GPL18573	GSE164788	SRA Run Selector	https://www.ncbi.nlm.nih.gov/Traces/study/?acc=SRX9833846	SRX9833846	Clemens Hug	Jan 14, 2021
GSM5018969	dge1_K14 RNA-seq of ReNcell VM treated with dmso	SRA	Homo sapiens	1	GPL18573	GSE164788	SRA Run Selector	https://www.ncbi.nlm.nih.gov/Traces/study/?acc=SRX9833847	SRX9833847	Clemens Hug	Jan 14, 2021
GSM5018970	dge1_K15 RNA-seq of ReNcell VM treated with 1 uM nvp-tae684	SRA	Homo sapiens	1	GPL18573	GSE164788	SRA Run Selector	https://www.ncbi.nlm.nih.gov/Traces/study/?acc=SRX9833848	SRX9833848	Clemens Hug	Jan 14, 2021
GSM5018971	dge1_K16 RNA-seq of ReNcell VM treated with 0.3 uM metformin	SRA	Homo sapiens	1	GPL18573	GSE164788	SRA Run Selector	https://www.ncbi.nlm.nih.gov/Traces/study/?acc=SRX9833863	SRX9833863	Clemens Hug	Jan 14, 2021
GSM5018972	dge1_K17 RNA-seq of ReNcell VM treated with 10 uM alisertib	SRA	Homo sapiens	1	GPL18573	GSE164788	SRA Run Selector	https://www.ncbi.nlm.nih.gov/Traces/study/?acc=SRX9833864	SRX9833864	Clemens Hug	Jan 14, 2021
GSM5018973	dge1_K18 RNA-seq of ReNcell VM treated with dmso	SRA	Homo sapiens	1	GPL18573	GSE164788	SRA Run Selector	https://www.ncbi.nlm.nih.gov/Traces/study/?acc=SRX9833865	SRX9833865	Clemens Hug	Jan 14, 2021
GSM5018974	dge1_K19 RNA-seq of ReNcell VM treated with 1 uM tofacitinib	SRA	Homo sapiens	1	GPL18573	GSE164788	SRA Run Selector	https://www.ncbi.nlm.nih.gov/Traces/study/?acc=SRX9833866	SRX9833866	Clemens Hug	Jan 14, 2021
GSM5018975	dge1_K20 RNA-seq of ReNcell VM treated with dsRNA	SRA	Homo sapiens	1	GPL18573	GSE164788	SRA Run Selector	https://www.ncbi.nlm.nih.gov/Traces/study/?acc=SRX9833867	SRX9833867	Clemens Hug	Jan 14, 2021
GSM5018976	dge1_K21 RNA-seq of ReNcell VM treated with 3 uM r 59949	SRA	Homo sapiens	1	GPL18573	GSE164788	SRA Run Selector	https://www.ncbi.nlm.nih.gov/Traces/study/?acc=SRX9833869	SRX9833869	Clemens Hug	Jan 14, 2021
GSM5018977	dge1_K22 RNA-seq of ReNcell VM treated with 3 uM a443654	SRA	Homo sapiens	1	GPL18573	GSE164788	SRA Run Selector	https://www.ncbi.nlm.nih.gov/Traces/study/?acc=SRX9833877	SRX9833877	Clemens Hug	Jan 14, 2021
GSM5018978	dge1_K23 RNA-seq of ReNcell VM treated with 3 uM tofacitinib	SRA	Homo sapiens	1	GPL18573	GSE164788	SRA Run Selector	https://www.ncbi.nlm.nih.gov/Traces/study/?acc=SRX9833878	SRX9833878	Clemens Hug	Jan 14, 2021
GSM5018979	dge1_K24 RNA-seq of ReNcell VM treated with 0.3 uM ldn-193189	SRA	Homo sapiens	1	GPL18573	GSE164788	SRA Run Selector	https://www.ncbi.nlm.nih.gov/Traces/study/?acc=SRX9833879	SRX9833879	Clemens Hug	Jan 14, 2021
GSM5018980	dge1_L01 RNA-seq of ReNcell VM treated with 10 uM (+)-jq1	SRA	Homo sapiens	1	GPL18573	GSE164788	SRA Run Selector	https://www.ncbi.nlm.nih.gov/Traces/study/?acc=SRX9833880	SRX9833880	Clemens Hug	Jan 14, 2021
GSM5018981	dge1_L02 RNA-seq of ReNcell VM treated with 1 uM zm-447439	SRA	Homo sapiens	1	GPL18573	GSE164788	SRA Run Selector	https://www.ncbi.nlm.nih.gov/Traces/study/?acc=SRX9833881	SRX9833881	Clemens Hug	Jan 14, 2021
GSM5018982	dge1_L03 RNA-seq of ReNcell VM treated with 1 uM alisertib	SRA	Homo sapiens	1	GPL18573	GSE164788	SRA Run Selector	https://www.ncbi.nlm.nih.gov/Traces/study/?acc=SRX9833882	SRX9833882	Clemens Hug	Jan 14, 2021
GSM5018983	dge1_L04 RNA-seq of ReNcell VM treated with 0.3 uM ldn-193189	SRA	Homo sapiens	1	GPL18573	GSE164788	SRA Run Selector	https://www.ncbi.nlm.nih.gov/Traces/study/?acc=SRX9833883	SRX9833883	Clemens Hug	Jan 14, 2021
GSM5018984	dge1_L05 RNA-seq of ReNcell VM treated with 10 uM chitosan	SRA	Homo sapiens	1	GPL18573	GSE164788	SRA Run Selector	https://www.ncbi.nlm.nih.gov/Traces/study/?acc=SRX9833884	SRX9833884	Clemens Hug	Jan 14, 2021
GSM5018985	dge1_L06 RNA-seq of ReNcell VM treated with 0.3 uM tofacitinib	SRA	Homo sapiens	1	GPL18573	GSE164788	SRA Run Selector	https://www.ncbi.nlm.nih.gov/Traces/study/?acc=SRX9833907	SRX9833907	Clemens Hug	Jan 14, 2021
GSM5018986	dge1_L07 RNA-seq of ReNcell VM treated with 3 uM bx-912	SRA	Homo sapiens	1	GPL18573	GSE164788	SRA Run Selector	https://www.ncbi.nlm.nih.gov/Traces/study/?acc=SRX9833909	SRX9833909	Clemens Hug	Jan 14, 2021
GSM5018987	dge1_L08 RNA-seq of ReNcell VM treated with 10 uM torin1	SRA	Homo sapiens	1	GPL18573	GSE164788	SRA Run Selector	https://www.ncbi.nlm.nih.gov/Traces/study/?acc=SRX9833910	SRX9833910	Clemens Hug	Jan 14, 2021
GSM5018988	dge1_L10 RNA-seq of ReNcell VM treated with 3 uM gsk1059615	SRA	Homo sapiens	1	GPL18573	GSE164788	SRA Run Selector	https://www.ncbi.nlm.nih.gov/Traces/study/?acc=SRX9833911	SRX9833911	Clemens Hug	Jan 14, 2021
GSM5018989	dge1_L11 RNA-seq of ReNcell VM treated with 1 uM r 59-022	SRA	Homo sapiens	1	GPL18573	GSE164788	SRA Run Selector	https://www.ncbi.nlm.nih.gov/Traces/study/?acc=SRX9833912	SRX9833912	Clemens Hug	Jan 14, 2021
GSM5018990	dge1_L12 RNA-seq of ReNcell VM treated with 1 uM gsk1059615	SRA	Homo sapiens	1	GPL18573	GSE164788	SRA Run Selector	https://www.ncbi.nlm.nih.gov/Traces/study/?acc=SRX9833913	SRX9833913	Clemens Hug	Jan 14, 2021
GSM5018991	dge1_L13 RNA-seq of ReNcell VM treated with dmso	SRA	Homo sapiens	1	GPL18573	GSE164788	SRA Run Selector	https://www.ncbi.nlm.nih.gov/Traces/study/?acc=SRX9833914	SRX9833914	Clemens Hug	Jan 14, 2021
GSM5018992	dge1_L14 RNA-seq of ReNcell VM treated with 0.3 uM pazopanib	SRA	Homo sapiens	1	GPL18573	GSE164788	SRA Run Selector	https://www.ncbi.nlm.nih.gov/Traces/study/?acc=SRX9833915	SRX9833915	Clemens Hug	Jan 14, 2021
GSM5018993	dge1_L15 RNA-seq of ReNcell VM treated with 0.3 uM barasertib	SRA	Homo sapiens	1	GPL18573	GSE164788	SRA Run Selector	https://www.ncbi.nlm.nih.gov/Traces/study/?acc=SRX9833916	SRX9833916	Clemens Hug	Jan 14, 2021
GSM5018994	dge1_L16 RNA-seq of ReNcell VM treated with 0.3 uM gsk1070916	SRA	Homo sapiens	1	GPL18573	GSE164788	SRA Run Selector	https://www.ncbi.nlm.nih.gov/Traces/study/?acc=SRX9833917	SRX9833917	Clemens Hug	Jan 14, 2021
GSM5018995	dge1_L17 RNA-seq of ReNcell VM treated with 3 uM brivanib	SRA	Homo sapiens	1	GPL18573	GSE164788	SRA Run Selector	https://www.ncbi.nlm.nih.gov/Traces/study/?acc=SRX9833918	SRX9833918	Clemens Hug	Jan 14, 2021
GSM5018996	dge1_L18 RNA-seq of ReNcell VM treated with 10 uM pazopanib	SRA	Homo sapiens	1	GPL18573	GSE164788	SRA Run Selector	https://www.ncbi.nlm.nih.gov/Traces/study/?acc=SRX9833920	SRX9833920	Clemens Hug	Jan 14, 2021
GSM5018997	dge1_L19 RNA-seq of ReNcell VM treated with 10 uM plx-4720	SRA	Homo sapiens	1	GPL18573	GSE164788	SRA Run Selector	https://www.ncbi.nlm.nih.gov/Traces/study/?acc=SRX9833921	SRX9833921	Clemens Hug	Jan 14, 2021
GSM5018998	dge1_L20 RNA-seq of ReNcell VM treated with 0.3 uM cabozantinib	SRA	Homo sapiens	1	GPL18573	GSE164788	SRA Run Selector	https://www.ncbi.nlm.nih.gov/Traces/study/?acc=SRX9833922	SRX9833922	Clemens Hug	Jan 14, 2021
GSM5018999	dge1_L21 RNA-seq of ReNcell VM treated with 1 uM ruxolitinib	SRA	Homo sapiens	1	GPL18573	GSE164788	SRA Run Selector	https://www.ncbi.nlm.nih.gov/Traces/study/?acc=SRX9833923	SRX9833923	Clemens Hug	Jan 14, 2021
GSM5019000	dge1_L22 RNA-seq of ReNcell VM treated with 0.3 uM pf04217903	SRA	Homo sapiens	1	GPL18573	GSE164788	SRA Run Selector	https://www.ncbi.nlm.nih.gov/Traces/study/?acc=SRX9833924	SRX9833924	Clemens Hug	Jan 14, 2021
GSM5019001	dge1_L23 RNA-seq of ReNcell VM treated with 0.3 uM a443654	SRA	Homo sapiens	1	GPL18573	GSE164788	SRA Run Selector	https://www.ncbi.nlm.nih.gov/Traces/study/?acc=SRX9833936	SRX9833936	Clemens Hug	Jan 14, 2021
GSM5019002	dge1_L24 RNA-seq of ReNcell VM treated with 1 uM nvp-tae684	SRA	Homo sapiens	1	GPL18573	GSE164788	SRA Run Selector	https://www.ncbi.nlm.nih.gov/Traces/study/?acc=SRX9833937	SRX9833937	Clemens Hug	Jan 14, 2021
GSM5019003	dge1_M01 RNA-seq of ReNcell VM treated with 0.3 uM gsk1070916	SRA	Homo sapiens	1	GPL18573	GSE164788	SRA Run Selector	https://www.ncbi.nlm.nih.gov/Traces/study/?acc=SRX9833938	SRX9833938	Clemens Hug	Jan 14, 2021
GSM5019004	dge1_M02 RNA-seq of ReNcell VM treated with 10 uM r 59-022	SRA	Homo sapiens	1	GPL18573	GSE164788	SRA Run Selector	https://www.ncbi.nlm.nih.gov/Traces/study/?acc=SRX9833930	SRX9833930	Clemens Hug	Jan 14, 2021
GSM5019005	dge1_M03 RNA-seq of ReNcell VM treated with 0.3 uM barasertib	SRA	Homo sapiens	1	GPL18573	GSE164788	SRA Run Selector	https://www.ncbi.nlm.nih.gov/Traces/study/?acc=SRX9833931	SRX9833931	Clemens Hug	Jan 14, 2021
GSM5019006	dge1_M04 RNA-seq of ReNcell VM treated with 1 uM bortezomib	SRA	Homo sapiens	1	GPL18573	GSE164788	SRA Run Selector	https://www.ncbi.nlm.nih.gov/Traces/study/?acc=SRX9833933	SRX9833933	Clemens Hug	Jan 14, 2021
GSM5019007	dge1_M05 RNA-seq of ReNcell VM treated with 1 uM metformin	SRA	Homo sapiens	1	GPL18573	GSE164788	SRA Run Selector	https://www.ncbi.nlm.nih.gov/Traces/study/?acc=SRX9833934	SRX9833934	Clemens Hug	Jan 14, 2021
GSM5019008	dge1_M06 RNA-seq of ReNcell VM treated with 0.3 uM nvp-tae684	SRA	Homo sapiens	1	GPL18573	GSE164788	SRA Run Selector	https://www.ncbi.nlm.nih.gov/Traces/study/?acc=SRX9833935	SRX9833935	Clemens Hug	Jan 14, 2021
GSM5019009	dge1_M07 RNA-seq of ReNcell VM treated with 10 uM kw2449	SRA	Homo sapiens	1	GPL18573	GSE164788	SRA Run Selector	https://www.ncbi.nlm.nih.gov/Traces/study/?acc=SRX9833941	SRX9833941	Clemens Hug	Jan 14, 2021
GSM5019010	dge1_M08 RNA-seq of ReNcell VM treated with 0.3 uM alisertib	SRA	Homo sapiens	1	GPL18573	GSE164788	SRA Run Selector	https://www.ncbi.nlm.nih.gov/Traces/study/?acc=SRX9833942	SRX9833942	Clemens Hug	Jan 14, 2021
GSM5019011	dge1_M09 RNA-seq of ReNcell VM treated with 0.3 uM tofacitinib	SRA	Homo sapiens	1	GPL18573	GSE164788	SRA Run Selector	https://www.ncbi.nlm.nih.gov/Traces/study/?acc=SRX9833943	SRX9833943	Clemens Hug	Jan 14, 2021
GSM5019012	dge1_M10 RNA-seq of ReNcell VM treated with 3 uM pazopanib	SRA	Homo sapiens	1	GPL18573	GSE164788	SRA Run Selector	https://www.ncbi.nlm.nih.gov/Traces/study/?acc=SRX9834087	SRX9834087	Clemens Hug	Jan 14, 2021
GSM5019013	dge1_M11 RNA-seq of ReNcell VM treated with 10 uM ruxolitinib	SRA	Homo sapiens	1	GPL18573	GSE164788	SRA Run Selector	https://www.ncbi.nlm.nih.gov/Traces/study/?acc=SRX9834088	SRX9834088	Clemens Hug	Jan 14, 2021
GSM5019014	dge1_M12 RNA-seq of ReNcell VM treated with 3 uM r 59949	SRA	Homo sapiens	1	GPL18573	GSE164788	SRA Run Selector	https://www.ncbi.nlm.nih.gov/Traces/study/?acc=SRX9834089	SRX9834089	Clemens Hug	Jan 14, 2021
GSM5019015	dge1_M13 RNA-seq of ReNcell VM treated with 0.3 uM gsk1070916	SRA	Homo sapiens	1	GPL18573	GSE164788	SRA Run Selector	https://www.ncbi.nlm.nih.gov/Traces/study/?acc=SRX9834090	SRX9834090	Clemens Hug	Jan 14, 2021
GSM5019016	dge1_M14 RNA-seq of ReNcell VM treated with 3 uM hg-9-91-01	SRA	Homo sapiens	1	GPL18573	GSE164788	SRA Run Selector	https://www.ncbi.nlm.nih.gov/Traces/study/?acc=SRX9834097	SRX9834097	Clemens Hug	Jan 14, 2021
GSM5019017	dge1_M15 RNA-seq of ReNcell VM treated with 3 uM kw2449	SRA	Homo sapiens	1	GPL18573	GSE164788	SRA Run Selector	https://www.ncbi.nlm.nih.gov/Traces/study/?acc=SRX9834098	SRX9834098	Clemens Hug	Jan 14, 2021
GSM5019018	dge1_M16 RNA-seq of ReNcell VM treated with 3 uM zm-447439	SRA	Homo sapiens	1	GPL18573	GSE164788	SRA Run Selector	https://www.ncbi.nlm.nih.gov/Traces/study/?acc=SRX9834099	SRX9834099	Clemens Hug	Jan 14, 2021
GSM5019019	dge1_M17 RNA-seq of ReNcell VM treated with 1 uM plx-4720	SRA	Homo sapiens	1	GPL18573	GSE164788	SRA Run Selector	https://www.ncbi.nlm.nih.gov/Traces/study/?acc=SRX9834100	SRX9834100	Clemens Hug	Jan 14, 2021
GSM5019020	dge1_M18 RNA-seq of ReNcell VM treated with 3 uM pf04217903	SRA	Homo sapiens	1	GPL18573	GSE164788	SRA Run Selector	https://www.ncbi.nlm.nih.gov/Traces/study/?acc=SRX9834101	SRX9834101	Clemens Hug	Jan 14, 2021
GSM5019021	dge1_M19 RNA-seq of ReNcell VM treated with 10 uM sb202190	SRA	Homo sapiens	1	GPL18573	GSE164788	SRA Run Selector	https://www.ncbi.nlm.nih.gov/Traces/study/?acc=SRX9834102	SRX9834102	Clemens Hug	Jan 14, 2021
GSM5019022	dge1_M20 RNA-seq of ReNcell VM treated with 10 uM mg-132	SRA	Homo sapiens	1	GPL18573	GSE164788	SRA Run Selector	https://www.ncbi.nlm.nih.gov/Traces/study/?acc=SRX9834103	SRX9834103	Clemens Hug	Jan 14, 2021
GSM5019023	dge1_M21 RNA-seq of ReNcell VM treated with 0.3 uM kw2449	SRA	Homo sapiens	1	GPL18573	GSE164788	SRA Run Selector	https://www.ncbi.nlm.nih.gov/Traces/study/?acc=SRX9834104	SRX9834104	Clemens Hug	Jan 14, 2021
GSM5019024	dge1_M22 RNA-seq of ReNcell VM treated with 3 uM nvp-tae684	SRA	Homo sapiens	1	GPL18573	GSE164788	SRA Run Selector	https://www.ncbi.nlm.nih.gov/Traces/study/?acc=SRX9834105	SRX9834105	Clemens Hug	Jan 14, 2021
GSM5019025	dge1_M23 RNA-seq of ReNcell VM treated with 10 uM metformin	SRA	Homo sapiens	1	GPL18573	GSE164788	SRA Run Selector	https://www.ncbi.nlm.nih.gov/Traces/study/?acc=SRX9834106	SRX9834106	Clemens Hug	Jan 14, 2021
GSM5019026	dge1_M24 RNA-seq of ReNcell VM treated with 10 uM ruxolitinib	SRA	Homo sapiens	1	GPL18573	GSE164788	SRA Run Selector	https://www.ncbi.nlm.nih.gov/Traces/study/?acc=SRX9834108	SRX9834108	Clemens Hug	Jan 14, 2021
GSM5019027	dge1_N01 RNA-seq of ReNcell VM treated with 10 uM chitosan	SRA	Homo sapiens	1	GPL18573	GSE164788	SRA Run Selector	https://www.ncbi.nlm.nih.gov/Traces/study/?acc=SRX9834109	SRX9834109	Clemens Hug	Jan 14, 2021
GSM5019028	dge1_N02 RNA-seq of ReNcell VM treated with 3 uM (+)-jq1	SRA	Homo sapiens	1	GPL18573	GSE164788	SRA Run Selector	https://www.ncbi.nlm.nih.gov/Traces/study/?acc=SRX9834110	SRX9834110	Clemens Hug	Jan 14, 2021
GSM5019029	dge1_N03 RNA-seq of ReNcell VM treated with 1 uM mg-132	SRA	Homo sapiens	1	GPL18573	GSE164788	SRA Run Selector	https://www.ncbi.nlm.nih.gov/Traces/study/?acc=SRX9834121	SRX9834121	Clemens Hug	Jan 14, 2021
GSM5019030	dge1_N04 RNA-seq of ReNcell VM treated with 3 uM pazopanib	SRA	Homo sapiens	1	GPL18573	GSE164788	SRA Run Selector	https://www.ncbi.nlm.nih.gov/Traces/study/?acc=SRX9834122	SRX9834122	Clemens Hug	Jan 14, 2021
GSM5019031	dge1_N05 RNA-seq of ReNcell VM treated with 1 uM plx-4720	SRA	Homo sapiens	1	GPL18573	GSE164788	SRA Run Selector	https://www.ncbi.nlm.nih.gov/Traces/study/?acc=SRX9834123	SRX9834123	Clemens Hug	Jan 14, 2021
GSM5019032	dge1_N06 RNA-seq of ReNcell VM treated with 10 uM nvp-tae684	SRA	Homo sapiens	1	GPL18573	GSE164788	SRA Run Selector	https://www.ncbi.nlm.nih.gov/Traces/study/?acc=SRX9834124	SRX9834124	Clemens Hug	Jan 14, 2021
GSM5019033	dge1_N07 RNA-seq of ReNcell VM treated with 0.3 uM torin1	SRA	Homo sapiens	1	GPL18573	GSE164788	SRA Run Selector	https://www.ncbi.nlm.nih.gov/Traces/study/?acc=SRX9834125	SRX9834125	Clemens Hug	Jan 14, 2021
GSM5019034	dge1_N08 RNA-seq of ReNcell VM treated with 0.3 uM bortezomib	SRA	Homo sapiens	1	GPL18573	GSE164788	SRA Run Selector	https://www.ncbi.nlm.nih.gov/Traces/study/?acc=SRX9834126	SRX9834126	Clemens Hug	Jan 14, 2021
GSM5019035	dge1_N09 RNA-seq of ReNcell VM treated with 1 uM barasertib	SRA	Homo sapiens	1	GPL18573	GSE164788	SRA Run Selector	https://www.ncbi.nlm.nih.gov/Traces/study/?acc=SRX9834127	SRX9834127	Clemens Hug	Jan 14, 2021
GSM5019036	dge1_N10 RNA-seq of ReNcell VM treated with 1 uM pazopanib	SRA	Homo sapiens	1	GPL18573	GSE164788	SRA Run Selector	https://www.ncbi.nlm.nih.gov/Traces/study/?acc=SRX9834129	SRX9834129	Clemens Hug	Jan 14, 2021
GSM5019037	dge1_N11 RNA-seq of ReNcell VM treated with 0.3 uM alisertib	SRA	Homo sapiens	1	GPL18573	GSE164788	SRA Run Selector	https://www.ncbi.nlm.nih.gov/Traces/study/?acc=SRX9834130	SRX9834130	Clemens Hug	Jan 14, 2021
GSM5019038	dge1_N12 RNA-seq of ReNcell VM treated with 3 uM alisertib	SRA	Homo sapiens	1	GPL18573	GSE164788	SRA Run Selector	https://www.ncbi.nlm.nih.gov/Traces/study/?acc=SRX9834131	SRX9834131	Clemens Hug	Jan 14, 2021
GSM5019039	dge1_N13 RNA-seq of ReNcell VM treated with 1 uM pf04217903	SRA	Homo sapiens	1	GPL18573	GSE164788	SRA Run Selector	https://www.ncbi.nlm.nih.gov/Traces/study/?acc=SRX9834132	SRX9834132	Clemens Hug	Jan 14, 2021
GSM5019040	dge1_N14 RNA-seq of ReNcell VM treated with 0.3 uM pf04217903	SRA	Homo sapiens	1	GPL18573	GSE164788	SRA Run Selector	https://www.ncbi.nlm.nih.gov/Traces/study/?acc=SRX9834133	SRX9834133	Clemens Hug	Jan 14, 2021
GSM5019041	dge1_N15 RNA-seq of ReNcell VM treated with 3 uM nvp-tae684	SRA	Homo sapiens	1	GPL18573	GSE164788	SRA Run Selector	https://www.ncbi.nlm.nih.gov/Traces/study/?acc=SRX9834134	SRX9834134	Clemens Hug	Jan 14, 2021
GSM5019042	dge1_N16 RNA-seq of ReNcell VM treated with 3 uM r 59-022	SRA	Homo sapiens	1	GPL18573	GSE164788	SRA Run Selector	https://www.ncbi.nlm.nih.gov/Traces/study/?acc=SRX9834143	SRX9834143	Clemens Hug	Jan 14, 2021
GSM5019043	dge1_N17 RNA-seq of ReNcell VM treated with dmso	SRA	Homo sapiens	1	GPL18573	GSE164788	SRA Run Selector	https://www.ncbi.nlm.nih.gov/Traces/study/?acc=SRX9834144	SRX9834144	Clemens Hug	Jan 14, 2021
GSM5019044	dge1_N18 RNA-seq of ReNcell VM treated with dmso	SRA	Homo sapiens	1	GPL18573	GSE164788	SRA Run Selector	https://www.ncbi.nlm.nih.gov/Traces/study/?acc=SRX9834145	SRX9834145	Clemens Hug	Jan 14, 2021
GSM5019045	dge1_N19 RNA-seq of ReNcell VM treated with 0.3 uM gsk1059615	SRA	Homo sapiens	1	GPL18573	GSE164788	SRA Run Selector	https://www.ncbi.nlm.nih.gov/Traces/study/?acc=SRX9834146	SRX9834146	Clemens Hug	Jan 14, 2021
GSM5019046	dge1_N20 RNA-seq of ReNcell VM treated with 0.3 uM r 59-022	SRA	Homo sapiens	1	GPL18573	GSE164788	SRA Run Selector	https://www.ncbi.nlm.nih.gov/Traces/study/?acc=SRX9834148	SRX9834148	Clemens Hug	Jan 14, 2021
GSM5019047	dge1_N21 RNA-seq of ReNcell VM treated with 1 uM barasertib	SRA	Homo sapiens	1	GPL18573	GSE164788	SRA Run Selector	https://www.ncbi.nlm.nih.gov/Traces/study/?acc=SRX9834149	SRX9834149	Clemens Hug	Jan 14, 2021
GSM5019048	dge1_N22 RNA-seq of ReNcell VM treated with 10 uM torin1	SRA	Homo sapiens	1	GPL18573	GSE164788	SRA Run Selector	https://www.ncbi.nlm.nih.gov/Traces/study/?acc=SRX9834150	SRX9834150	Clemens Hug	Jan 14, 2021
GSM5019049	dge1_N23 RNA-seq of ReNcell VM treated with 1 uM rotenone	SRA	Homo sapiens	1	GPL18573	GSE164788	SRA Run Selector	https://www.ncbi.nlm.nih.gov/Traces/study/?acc=SRX9834158	SRX9834158	Clemens Hug	Jan 14, 2021
GSM5019050	dge1_N24 RNA-seq of ReNcell VM treated with 3 uM torin1	SRA	Homo sapiens	1	GPL18573	GSE164788	SRA Run Selector	https://www.ncbi.nlm.nih.gov/Traces/study/?acc=SRX9834159	SRX9834159	Clemens Hug	Jan 14, 2021
GSM5019051	dge1_O01 RNA-seq of ReNcell VM treated with 3 uM torin1	SRA	Homo sapiens	1	GPL18573	GSE164788	SRA Run Selector	https://www.ncbi.nlm.nih.gov/Traces/study/?acc=SRX9834160	SRX9834160	Clemens Hug	Jan 14, 2021
GSM5019052	dge1_O02 RNA-seq of ReNcell VM treated with 3 uM ldn-193189	SRA	Homo sapiens	1	GPL18573	GSE164788	SRA Run Selector	https://www.ncbi.nlm.nih.gov/Traces/study/?acc=SRX9834161	SRX9834161	Clemens Hug	Jan 14, 2021
GSM5019053	dge1_O03 RNA-seq of ReNcell VM treated with 1 uM barasertib	SRA	Homo sapiens	1	GPL18573	GSE164788	SRA Run Selector	https://www.ncbi.nlm.nih.gov/Traces/study/?acc=SRX9834162	SRX9834162	Clemens Hug	Jan 14, 2021
GSM5019054	dge1_O04 RNA-seq of ReNcell VM treated with 10 uM ruxolitinib	SRA	Homo sapiens	1	GPL18573	GSE164788	SRA Run Selector	https://www.ncbi.nlm.nih.gov/Traces/study/?acc=SRX9834163	SRX9834163	Clemens Hug	Jan 14, 2021
GSM5019055	dge1_O05 RNA-seq of ReNcell VM treated with 1 uM fedratinib	SRA	Homo sapiens	1	GPL18573	GSE164788	SRA Run Selector	https://www.ncbi.nlm.nih.gov/Traces/study/?acc=SRX9834164	SRX9834164	Clemens Hug	Jan 14, 2021
GSM5019056	dge1_O06 RNA-seq of ReNcell VM treated with dmso	SRA	Homo sapiens	1	GPL18573	GSE164788	SRA Run Selector	https://www.ncbi.nlm.nih.gov/Traces/study/?acc=SRX9834018	SRX9834018	Clemens Hug	Jan 14, 2021
GSM5019057	dge1_O07 RNA-seq of ReNcell VM treated with 1 uM pha-665752	SRA	Homo sapiens	1	GPL18573	GSE164788	SRA Run Selector	https://www.ncbi.nlm.nih.gov/Traces/study/?acc=SRX9834019	SRX9834019	Clemens Hug	Jan 14, 2021
GSM5019058	dge1_O08 RNA-seq of ReNcell VM treated with 0.3 uM bx-912	SRA	Homo sapiens	1	GPL18573	GSE164788	SRA Run Selector	https://www.ncbi.nlm.nih.gov/Traces/study/?acc=SRX9834020	SRX9834020	Clemens Hug	Jan 14, 2021
GSM5019059	dge1_O09 RNA-seq of ReNcell VM treated with dmso	SRA	Homo sapiens	1	GPL18573	GSE164788	SRA Run Selector	https://www.ncbi.nlm.nih.gov/Traces/study/?acc=SRX9834021	SRX9834021	Clemens Hug	Jan 14, 2021
GSM5019060	dge1_O10 RNA-seq of ReNcell VM treated with 3 uM fedratinib	SRA	Homo sapiens	1	GPL18573	GSE164788	SRA Run Selector	https://www.ncbi.nlm.nih.gov/Traces/study/?acc=SRX9834022	SRX9834022	Clemens Hug	Jan 14, 2021
GSM5019061	dge1_O11 RNA-seq of ReNcell VM treated with 0.3 uM kw2449	SRA	Homo sapiens	1	GPL18573	GSE164788	SRA Run Selector	https://www.ncbi.nlm.nih.gov/Traces/study/?acc=SRX9834023	SRX9834023	Clemens Hug	Jan 14, 2021
GSM5019062	dge1_O12 RNA-seq of ReNcell VM treated with 1 uM alisertib	SRA	Homo sapiens	1	GPL18573	GSE164788	SRA Run Selector	https://www.ncbi.nlm.nih.gov/Traces/study/?acc=SRX9834024	SRX9834024	Clemens Hug	Jan 14, 2021
GSM5019063	dge1_O13 RNA-seq of ReNcell VM treated with 1 uM gsk1070916	SRA	Homo sapiens	1	GPL18573	GSE164788	SRA Run Selector	https://www.ncbi.nlm.nih.gov/Traces/study/?acc=SRX9834025	SRX9834025	Clemens Hug	Jan 14, 2021
GSM5019064	dge1_O15 RNA-seq of ReNcell VM treated with 0.3 uM plx-4720	SRA	Homo sapiens	1	GPL18573	GSE164788	SRA Run Selector	https://www.ncbi.nlm.nih.gov/Traces/study/?acc=SRX9834026	SRX9834026	Clemens Hug	Jan 14, 2021
GSM5019066	dge1_O17 RNA-seq of ReNcell VM treated with 10 uM bx-912	SRA	Homo sapiens	1	GPL18573	GSE164788	SRA Run Selector	https://www.ncbi.nlm.nih.gov/Traces/study/?acc=SRX9834029	SRX9834029	Clemens Hug	Jan 14, 2021
GSM5019067	dge1_O18 RNA-seq of ReNcell VM treated with 0.3 uM pazopanib	SRA	Homo sapiens	1	GPL18573	GSE164788	SRA Run Selector	https://www.ncbi.nlm.nih.gov/Traces/study/?acc=SRX9834030	SRX9834030	Clemens Hug	Jan 14, 2021
GSM5019068	dge1_O19 RNA-seq of ReNcell VM treated with 3 uM gsk1070916	SRA	Homo sapiens	1	GPL18573	GSE164788	SRA Run Selector	https://www.ncbi.nlm.nih.gov/Traces/study/?acc=SRX9834038	SRX9834038	Clemens Hug	Jan 14, 2021
GSM5019069	dge1_O20 RNA-seq of ReNcell VM treated with 0.3 uM fedratinib	SRA	Homo sapiens	1	GPL18573	GSE164788	SRA Run Selector	https://www.ncbi.nlm.nih.gov/Traces/study/?acc=SRX9834039	SRX9834039	Clemens Hug	Jan 14, 2021
GSM5019070	dge1_O21 RNA-seq of ReNcell VM treated with 10 uM chitosan	SRA	Homo sapiens	1	GPL18573	GSE164788	SRA Run Selector	https://www.ncbi.nlm.nih.gov/Traces/study/?acc=SRX9834040	SRX9834040	Clemens Hug	Jan 14, 2021
GSM5019071	dge1_O22 RNA-seq of ReNcell VM treated with 3 uM metformin	SRA	Homo sapiens	1	GPL18573	GSE164788	SRA Run Selector	https://www.ncbi.nlm.nih.gov/Traces/study/?acc=SRX9834041	SRX9834041	Clemens Hug	Jan 14, 2021
GSM5019072	dge1_O23 RNA-seq of ReNcell VM treated with 3 uM pf04217903	SRA	Homo sapiens	1	GPL18573	GSE164788	SRA Run Selector	https://www.ncbi.nlm.nih.gov/Traces/study/?acc=SRX9834042	SRX9834042	Clemens Hug	Jan 14, 2021
GSM5019073	dge1_O24 RNA-seq of ReNcell VM treated with 3 uM zm-447439	SRA	Homo sapiens	1	GPL18573	GSE164788	SRA Run Selector	https://www.ncbi.nlm.nih.gov/Traces/study/?acc=SRX9834043	SRX9834043	Clemens Hug	Jan 14, 2021
GSM5019074	dge1_P01 RNA-seq of ReNcell VM treated with 10 uM rotenone	SRA	Homo sapiens	1	GPL18573	GSE164788	SRA Run Selector	https://www.ncbi.nlm.nih.gov/Traces/study/?acc=SRX9834044	SRX9834044	Clemens Hug	Jan 14, 2021
GSM5019075	dge1_P02 RNA-seq of ReNcell VM treated with 1 uM brivanib	SRA	Homo sapiens	1	GPL18573	GSE164788	SRA Run Selector	https://www.ncbi.nlm.nih.gov/Traces/study/?acc=SRX9834045	SRX9834045	Clemens Hug	Jan 14, 2021
GSM5019076	dge1_P03 RNA-seq of ReNcell VM treated with 3 uM alisertib	SRA	Homo sapiens	1	GPL18573	GSE164788	SRA Run Selector	https://www.ncbi.nlm.nih.gov/Traces/study/?acc=SRX9834047	SRX9834047	Clemens Hug	Jan 14, 2021
GSM5019077	dge1_P04 RNA-seq of ReNcell VM treated with 0.3 uM entinostat	SRA	Homo sapiens	1	GPL18573	GSE164788	SRA Run Selector	https://www.ncbi.nlm.nih.gov/Traces/study/?acc=SRX9834048	SRX9834048	Clemens Hug	Jan 14, 2021
GSM5019078	dge1_P05 RNA-seq of ReNcell VM treated with 3 uM entinostat	SRA	Homo sapiens	1	GPL18573	GSE164788	SRA Run Selector	https://www.ncbi.nlm.nih.gov/Traces/study/?acc=SRX9834049	SRX9834049	Clemens Hug	Jan 14, 2021
GSM5019079	dge1_P06 RNA-seq of ReNcell VM treated with 1 uM entinostat	SRA	Homo sapiens	1	GPL18573	GSE164788	SRA Run Selector	https://www.ncbi.nlm.nih.gov/Traces/study/?acc=SRX9834050	SRX9834050	Clemens Hug	Jan 14, 2021
GSM5019080	dge1_P07 RNA-seq of ReNcell VM treated with 10 uM ldn-193189	SRA	Homo sapiens	1	GPL18573	GSE164788	SRA Run Selector	https://www.ncbi.nlm.nih.gov/Traces/study/?acc=SRX9834051	SRX9834051	Clemens Hug	Jan 14, 2021
GSM5019081	dge1_P08 RNA-seq of ReNcell VM treated with 1 uM cabozantinib	SRA	Homo sapiens	1	GPL18573	GSE164788	SRA Run Selector	https://www.ncbi.nlm.nih.gov/Traces/study/?acc=SRX9834052	SRX9834052	Clemens Hug	Jan 14, 2021
GSM5019082	dge1_P09 RNA-seq of ReNcell VM treated with 3 uM bortezomib	SRA	Homo sapiens	1	GPL18573	GSE164788	SRA Run Selector	https://www.ncbi.nlm.nih.gov/Traces/study/?acc=SRX9834054	SRX9834054	Clemens Hug	Jan 14, 2021
GSM5019083	dge1_P10 RNA-seq of ReNcell VM treated with 10 uM r 59-022	SRA	Homo sapiens	1	GPL18573	GSE164788	SRA Run Selector	https://www.ncbi.nlm.nih.gov/Traces/study/?acc=SRX9834055	SRX9834055	Clemens Hug	Jan 14, 2021
GSM5019084	dge1_P12 RNA-seq of ReNcell VM treated with 1 uM bx-912	SRA	Homo sapiens	1	GPL18573	GSE164788	SRA Run Selector	https://www.ncbi.nlm.nih.gov/Traces/study/?acc=SRX9834056	SRX9834056	Clemens Hug	Jan 14, 2021
GSM5019085	dge1_P13 RNA-seq of ReNcell VM treated with 10 uM torin1	SRA	Homo sapiens	1	GPL18573	GSE164788	SRA Run Selector	https://www.ncbi.nlm.nih.gov/Traces/study/?acc=SRX9834057	SRX9834057	Clemens Hug	Jan 14, 2021
GSM5019086	dge1_P14 RNA-seq of ReNcell VM treated with 10 uM entinostat	SRA	Homo sapiens	1	GPL18573	GSE164788	SRA Run Selector	https://www.ncbi.nlm.nih.gov/Traces/study/?acc=SRX9834059	SRX9834059	Clemens Hug	Jan 14, 2021
GSM5019087	dge1_P15 RNA-seq of ReNcell VM treated with 3 uM plx-4720	SRA	Homo sapiens	1	GPL18573	GSE164788	SRA Run Selector	https://www.ncbi.nlm.nih.gov/Traces/study/?acc=SRX9834060	SRX9834060	Clemens Hug	Jan 14, 2021
GSM5019088	dge1_P16 RNA-seq of ReNcell VM treated with 3 uM entinostat	SRA	Homo sapiens	1	GPL18573	GSE164788	SRA Run Selector	https://www.ncbi.nlm.nih.gov/Traces/study/?acc=SRX9834068	SRX9834068	Clemens Hug	Jan 14, 2021
GSM5019089	dge1_P17 RNA-seq of ReNcell VM treated with 3 uM plx-4720	SRA	Homo sapiens	1	GPL18573	GSE164788	SRA Run Selector	https://www.ncbi.nlm.nih.gov/Traces/study/?acc=SRX9834069	SRX9834069	Clemens Hug	Jan 14, 2021
GSM5019090	dge1_P18 RNA-seq of ReNcell VM treated with 10 uM gsk1070916	SRA	Homo sapiens	1	GPL18573	GSE164788	SRA Run Selector	https://www.ncbi.nlm.nih.gov/Traces/study/?acc=SRX9834070	SRX9834070	Clemens Hug	Jan 14, 2021
GSM5019091	dge1_P19 RNA-seq of ReNcell VM treated with 10 uM brivanib	SRA	Homo sapiens	1	GPL18573	GSE164788	SRA Run Selector	https://www.ncbi.nlm.nih.gov/Traces/study/?acc=SRX9834071	SRX9834071	Clemens Hug	Jan 14, 2021
GSM5019092	dge1_P20 RNA-seq of ReNcell VM treated with lipofectamine	SRA	Homo sapiens	1	GPL18573	GSE164788	SRA Run Selector	https://www.ncbi.nlm.nih.gov/Traces/study/?acc=SRX9834072	SRX9834072	Clemens Hug	Jan 14, 2021
GSM5019093	dge1_P21 RNA-seq of ReNcell VM treated with 0.3 uM hg-9-91-01	SRA	Homo sapiens	1	GPL18573	GSE164788	SRA Run Selector	https://www.ncbi.nlm.nih.gov/Traces/study/?acc=SRX9834073	SRX9834073	Clemens Hug	Jan 14, 2021
GSM5019094	dge1_P22 RNA-seq of ReNcell VM treated with 10 uM entinostat	SRA	Homo sapiens	1	GPL18573	GSE164788	SRA Run Selector	https://www.ncbi.nlm.nih.gov/Traces/study/?acc=SRX9834074	SRX9834074	Clemens Hug	Jan 14, 2021
GSM5019095	dge1_P23 RNA-seq of ReNcell VM treated with 0.3 uM bx-912	SRA	Homo sapiens	1	GPL18573	GSE164788	SRA Run Selector	https://www.ncbi.nlm.nih.gov/Traces/study/?acc=SRX9834075	SRX9834075	Clemens Hug	Jan 14, 2021
GSM5019096	dge1_P24 RNA-seq of ReNcell VM treated with 1 uM a443654	SRA	Homo sapiens	1	GPL18573	GSE164788	SRA Run Selector	https://www.ncbi.nlm.nih.gov/Traces/study/?acc=SRX9834077	SRX9834077	Clemens Hug	Jan 14, 2021
GSM5019097	dge2_A01 RNA-seq of ReNcell VM treated with 1 uM canertinib	SRA	Homo sapiens	1	GPL18573	GSE164788	SRA Run Selector	https://www.ncbi.nlm.nih.gov/Traces/study/?acc=SRX9834078	SRX9834078	Clemens Hug	Jan 14, 2021
GSM5019098	dge2_A02 RNA-seq of ReNcell VM treated with 10 uM ikk16	SRA	Homo sapiens	1	GPL18573	GSE164788	SRA Run Selector	https://www.ncbi.nlm.nih.gov/Traces/study/?acc=SRX9834080	SRX9834080	Clemens Hug	Jan 14, 2021
GSM5019099	dge2_A03 RNA-seq of ReNcell VM treated with 10 uM vx-702	SRA	Homo sapiens	1	GPL18573	GSE164788	SRA Run Selector	https://www.ncbi.nlm.nih.gov/Traces/study/?acc=SRX9834081	SRX9834081	Clemens Hug	Jan 14, 2021
GSM5019100	dge2_A04 RNA-seq of ReNcell VM treated with 1 uM nintedanib	SRA	Homo sapiens	1	GPL18573	GSE164788	SRA Run Selector	https://www.ncbi.nlm.nih.gov/Traces/study/?acc=SRX9834082	SRX9834082	Clemens Hug	Jan 14, 2021
GSM5019101	dge2_A05 RNA-seq of ReNcell VM treated with 1 uM vorinostat	SRA	Homo sapiens	1	GPL18573	GSE164788	SRA Run Selector	https://www.ncbi.nlm.nih.gov/Traces/study/?acc=SRX9834323	SRX9834323	Clemens Hug	Jan 14, 2021
GSM5019102	dge2_A06 RNA-seq of ReNcell VM treated with 10 uM ponatinib	SRA	Homo sapiens	1	GPL18573	GSE164788	SRA Run Selector	https://www.ncbi.nlm.nih.gov/Traces/study/?acc=SRX9834324	SRX9834324	Clemens Hug	Jan 14, 2021
GSM5019103	dge2_A07 RNA-seq of ReNcell VM treated with 1 uM ponatinib	SRA	Homo sapiens	1	GPL18573	GSE164788	SRA Run Selector	https://www.ncbi.nlm.nih.gov/Traces/study/?acc=SRX9834325	SRX9834325	Clemens Hug	Jan 14, 2021
GSM5019104	dge2_A08 RNA-seq of ReNcell VM treated with 10 uM tofacitinib + dsRNA	SRA	Homo sapiens	1	GPL18573	GSE164788	SRA Run Selector	https://www.ncbi.nlm.nih.gov/Traces/study/?acc=SRX9834326	SRX9834326	Clemens Hug	Jan 14, 2021
GSM5019105	dge2_A09 RNA-seq of ReNcell VM treated with 10 uM dovitinib	SRA	Homo sapiens	1	GPL18573	GSE164788	SRA Run Selector	https://www.ncbi.nlm.nih.gov/Traces/study/?acc=SRX9834327	SRX9834327	Clemens Hug	Jan 14, 2021
GSM5019106	dge2_A10 RNA-seq of ReNcell VM treated with 1 uM torin2	SRA	Homo sapiens	1	GPL18573	GSE164788	SRA Run Selector	https://www.ncbi.nlm.nih.gov/Traces/study/?acc=SRX9834329	SRX9834329	Clemens Hug	Jan 14, 2021
GSM5019107	dge2_A11 RNA-seq of ReNcell VM treated with 10 uM baricitinib + dsRNA	SRA	Homo sapiens	1	GPL18573	GSE164788	SRA Run Selector	https://www.ncbi.nlm.nih.gov/Traces/study/?acc=SRX9834330	SRX9834330	Clemens Hug	Jan 14, 2021
GSM5019108	dge2_A12 RNA-seq of ReNcell VM treated with 1 uM dasatinib	SRA	Homo sapiens	1	GPL18573	GSE164788	SRA Run Selector	https://www.ncbi.nlm.nih.gov/Traces/study/?acc=SRX9834331	SRX9834331	Clemens Hug	Jan 14, 2021
GSM5019109	dge2_A13 RNA-seq of ReNcell VM treated with 10 uM xmd16-144	SRA	Homo sapiens	1	GPL18573	GSE164788	SRA Run Selector	https://www.ncbi.nlm.nih.gov/Traces/study/?acc=SRX9834332	SRX9834332	Clemens Hug	Jan 14, 2021
GSM5019110	dge2_A14 RNA-seq of ReNcell VM treated with 10 uM azd-1480	SRA	Homo sapiens	1	GPL18573	GSE164788	SRA Run Selector	https://www.ncbi.nlm.nih.gov/Traces/study/?acc=SRX9834333	SRX9834333	Clemens Hug	Jan 14, 2021
GSM5019111	dge2_A15 RNA-seq of ReNcell VM treated with 10 uM imatinib	SRA	Homo sapiens	1	GPL18573	GSE164788	SRA Run Selector	https://www.ncbi.nlm.nih.gov/Traces/study/?acc=SRX9834334	SRX9834334	Clemens Hug	Jan 14, 2021
GSM5019112	dge2_A16 RNA-seq of ReNcell VM treated with 10 uM gefitinib	SRA	Homo sapiens	1	GPL18573	GSE164788	SRA Run Selector	https://www.ncbi.nlm.nih.gov/Traces/study/?acc=SRX9834335	SRX9834335	Clemens Hug	Jan 14, 2021
GSM5019113	dge2_A17 RNA-seq of ReNcell VM treated with 10 uM imatinib	SRA	Homo sapiens	1	GPL18573	GSE164788	SRA Run Selector	https://www.ncbi.nlm.nih.gov/Traces/study/?acc=SRX9834336	SRX9834336	Clemens Hug	Jan 14, 2021
GSM5019114	dge2_A18 RNA-seq of ReNcell VM treated with 10 uM afatinib	SRA	Homo sapiens	1	GPL18573	GSE164788	SRA Run Selector	https://www.ncbi.nlm.nih.gov/Traces/study/?acc=SRX9834337	SRX9834337	Clemens Hug	Jan 14, 2021
GSM5019115	dge2_A19 RNA-seq of ReNcell VM treated with 1 uM pf-06463922	SRA	Homo sapiens	1	GPL18573	GSE164788	SRA Run Selector	https://www.ncbi.nlm.nih.gov/Traces/study/?acc=SRX9834345	SRX9834345	Clemens Hug	Jan 14, 2021
GSM5019116	dge2_A20 RNA-seq of ReNcell VM treated with 1 uM staurosporine aglycone	SRA	Homo sapiens	1	GPL18573	GSE164788	SRA Run Selector	https://www.ncbi.nlm.nih.gov/Traces/study/?acc=SRX9834348	SRX9834348	Clemens Hug	Jan 14, 2021
GSM5019117	dge2_A21 RNA-seq of ReNcell VM treated with 10 uM palbociclib	SRA	Homo sapiens	1	GPL18573	GSE164788	SRA Run Selector	https://www.ncbi.nlm.nih.gov/Traces/study/?acc=SRX9834349	SRX9834349	Clemens Hug	Jan 14, 2021
GSM5019118	dge2_A22 RNA-seq of ReNcell VM treated with 10 uM baricitinib	SRA	Homo sapiens	1	GPL18573	GSE164788	SRA Run Selector	https://www.ncbi.nlm.nih.gov/Traces/study/?acc=SRX9834350	SRX9834350	Clemens Hug	Jan 14, 2021
GSM5019119	dge2_A23 RNA-seq of ReNcell VM treated with 1 uM vx-702	SRA	Homo sapiens	1	GPL18573	GSE164788	SRA Run Selector	https://www.ncbi.nlm.nih.gov/Traces/study/?acc=SRX9834351	SRX9834351	Clemens Hug	Jan 14, 2021
GSM5019120	dge2_A24 RNA-seq of ReNcell VM treated with 1 uM erlotinib	SRA	Homo sapiens	1	GPL18573	GSE164788	SRA Run Selector	https://www.ncbi.nlm.nih.gov/Traces/study/?acc=SRX9834362	SRX9834362	Clemens Hug	Jan 14, 2021
GSM5019121	dge2_B01 RNA-seq of ReNcell VM treated with 1 uM jwe-035	SRA	Homo sapiens	1	GPL18573	GSE164788	SRA Run Selector	https://www.ncbi.nlm.nih.gov/Traces/study/?acc=SRX9834363	SRX9834363	Clemens Hug	Jan 14, 2021
GSM5019122	dge2_B02 RNA-seq of ReNcell VM treated with 1 uM crizotinib	SRA	Homo sapiens	1	GPL18573	GSE164788	SRA Run Selector	https://www.ncbi.nlm.nih.gov/Traces/study/?acc=SRX9834364	SRX9834364	Clemens Hug	Jan 14, 2021
GSM5019123	dge2_B03 RNA-seq of ReNcell VM treated with 10 uM azd1480 + lipofectamine	SRA	Homo sapiens	1	GPL18573	GSE164788	SRA Run Selector	https://www.ncbi.nlm.nih.gov/Traces/study/?acc=SRX9834365	SRX9834365	Clemens Hug	Jan 14, 2021
GSM5019124	dge2_B04 RNA-seq of ReNcell VM treated with 10 uM axitinib	SRA	Homo sapiens	1	GPL18573	GSE164788	SRA Run Selector	https://www.ncbi.nlm.nih.gov/Traces/study/?acc=SRX9834366	SRX9834366	Clemens Hug	Jan 14, 2021
GSM5019125	dge2_B05 RNA-seq of ReNcell VM treated with 1 uM canertinib	SRA	Homo sapiens	1	GPL18573	GSE164788	SRA Run Selector	https://www.ncbi.nlm.nih.gov/Traces/study/?acc=SRX9834367	SRX9834367	Clemens Hug	Jan 14, 2021
GSM5019126	dge2_B06 RNA-seq of ReNcell VM treated with 10 uM pelitinib	SRA	Homo sapiens	1	GPL18573	GSE164788	SRA Run Selector	https://www.ncbi.nlm.nih.gov/Traces/study/?acc=SRX9834384	SRX9834384	Clemens Hug	Jan 14, 2021
GSM5019127	dge2_B07 RNA-seq of ReNcell VM treated with dmso	SRA	Homo sapiens	1	GPL18573	GSE164788	SRA Run Selector	https://www.ncbi.nlm.nih.gov/Traces/study/?acc=SRX9834385	SRX9834385	Clemens Hug	Jan 14, 2021
GSM5019128	dge2_B08 RNA-seq of ReNcell VM treated with 1 uM baricitinib	SRA	Homo sapiens	1	GPL18573	GSE164788	SRA Run Selector	https://www.ncbi.nlm.nih.gov/Traces/study/?acc=SRX9834386	SRX9834386	Clemens Hug	Jan 14, 2021
GSM5019129	dge2_B09 RNA-seq of ReNcell VM treated with 1 uM pelitinib	SRA	Homo sapiens	1	GPL18573	GSE164788	SRA Run Selector	https://www.ncbi.nlm.nih.gov/Traces/study/?acc=SRX9834387	SRX9834387	Clemens Hug	Jan 14, 2021
GSM5019130	dge2_B10 RNA-seq of ReNcell VM treated with 10 uM tofacitinib + lipofectamine	SRA	Homo sapiens	1	GPL18573	GSE164788	SRA Run Selector	https://www.ncbi.nlm.nih.gov/Traces/study/?acc=SRX9834388	SRX9834388	Clemens Hug	Jan 14, 2021
GSM5019131	dge2_B11 RNA-seq of ReNcell VM treated with 10 uM ibrutinib	SRA	Homo sapiens	1	GPL18573	GSE164788	SRA Run Selector	https://www.ncbi.nlm.nih.gov/Traces/study/?acc=SRX9834389	SRX9834389	Clemens Hug	Jan 14, 2021
GSM5019132	dge2_B12 RNA-seq of ReNcell VM treated with 1 uM baricitinib	SRA	Homo sapiens	1	GPL18573	GSE164788	SRA Run Selector	https://www.ncbi.nlm.nih.gov/Traces/study/?acc=SRX9834390	SRX9834390	Clemens Hug	Jan 14, 2021
GSM5019133	dge2_B13 RNA-seq of ReNcell VM treated with 1 uM pelitinib	SRA	Homo sapiens	1	GPL18573	GSE164788	SRA Run Selector	https://www.ncbi.nlm.nih.gov/Traces/study/?acc=SRX9834514	SRX9834514	Clemens Hug	Jan 14, 2021
GSM5019134	dge2_B14 RNA-seq of ReNcell VM treated with 1 uM afatinib	SRA	Homo sapiens	1	GPL18573	GSE164788	SRA Run Selector	https://www.ncbi.nlm.nih.gov/Traces/study/?acc=SRX9834515	SRX9834515	Clemens Hug	Jan 14, 2021
GSM5019135	dge2_B15 RNA-seq of ReNcell VM treated with 10 uM nilotinib	SRA	Homo sapiens	1	GPL18573	GSE164788	SRA Run Selector	https://www.ncbi.nlm.nih.gov/Traces/study/?acc=SRX9834516	SRX9834516	Clemens Hug	Jan 14, 2021
GSM5019136	dge2_B16 RNA-seq of ReNcell VM treated with 10 uM imatinib	SRA	Homo sapiens	1	GPL18573	GSE164788	SRA Run Selector	https://www.ncbi.nlm.nih.gov/Traces/study/?acc=SRX9834518	SRX9834518	Clemens Hug	Jan 14, 2021
GSM5019137	dge2_B17 RNA-seq of ReNcell VM treated with 10 uM xl019 + dsRNA	SRA	Homo sapiens	1	GPL18573	GSE164788	SRA Run Selector	https://www.ncbi.nlm.nih.gov/Traces/study/?acc=SRX9834519	SRX9834519	Clemens Hug	Jan 14, 2021
GSM5019138	dge2_B18 RNA-seq of ReNcell VM treated with 1 uM dactolisib	SRA	Homo sapiens	1	GPL18573	GSE164788	SRA Run Selector	https://www.ncbi.nlm.nih.gov/Traces/study/?acc=SRX9834520	SRX9834520	Clemens Hug	Jan 14, 2021
GSM5019139	dge2_B19 RNA-seq of ReNcell VM treated with 1 uM ikk16	SRA	Homo sapiens	1	GPL18573	GSE164788	SRA Run Selector	https://www.ncbi.nlm.nih.gov/Traces/study/?acc=SRX9833992	SRX9833992	Clemens Hug	Jan 14, 2021
GSM5019140	dge2_B20 RNA-seq of ReNcell VM treated with 10 uM vorinostat	SRA	Homo sapiens	1	GPL18573	GSE164788	SRA Run Selector	https://www.ncbi.nlm.nih.gov/Traces/study/?acc=SRX9833993	SRX9833993	Clemens Hug	Jan 14, 2021
GSM5019141	dge2_B21 RNA-seq of ReNcell VM treated with 1 uM mrt67307	SRA	Homo sapiens	1	GPL18573	GSE164788	SRA Run Selector	https://www.ncbi.nlm.nih.gov/Traces/study/?acc=SRX9833994	SRX9833994	Clemens Hug	Jan 14, 2021
GSM5019142	dge2_B22 RNA-seq of ReNcell VM treated with 10 uM crizotinib	SRA	Homo sapiens	1	GPL18573	GSE164788	SRA Run Selector	https://www.ncbi.nlm.nih.gov/Traces/study/?acc=SRX9833995	SRX9833995	Clemens Hug	Jan 14, 2021
GSM5019143	dge2_B23 RNA-seq of ReNcell VM treated with 1 uM palbociclib	SRA	Homo sapiens	1	GPL18573	GSE164788	SRA Run Selector	https://www.ncbi.nlm.nih.gov/Traces/study/?acc=SRX9833996	SRX9833996	Clemens Hug	Jan 14, 2021
GSM5019144	dge2_B24 RNA-seq of ReNcell VM treated with 10 uM ponatinib	SRA	Homo sapiens	1	GPL18573	GSE164788	SRA Run Selector	https://www.ncbi.nlm.nih.gov/Traces/study/?acc=SRX9833997	SRX9833997	Clemens Hug	Jan 14, 2021
GSM5019145	dge2_C01 RNA-seq of ReNcell VM treated with 1 uM torin2	SRA	Homo sapiens	1	GPL18573	GSE164788	SRA Run Selector	https://www.ncbi.nlm.nih.gov/Traces/study/?acc=SRX9833998	SRX9833998	Clemens Hug	Jan 14, 2021
GSM5019146	dge2_C02 RNA-seq of ReNcell VM treated with 10 uM xmd16-144	SRA	Homo sapiens	1	GPL18573	GSE164788	SRA Run Selector	https://www.ncbi.nlm.nih.gov/Traces/study/?acc=SRX9834168	SRX9834168	Clemens Hug	Jan 14, 2021
GSM5019147	dge2_C03 RNA-seq of ReNcell VM treated with 1 uM vandetanib	SRA	Homo sapiens	1	GPL18573	GSE164788	SRA Run Selector	https://www.ncbi.nlm.nih.gov/Traces/study/?acc=SRX9834169	SRX9834169	Clemens Hug	Jan 14, 2021
GSM5019148	dge2_C04 RNA-seq of ReNcell VM treated with 10 uM xl019 + dsRNA	SRA	Homo sapiens	1	GPL18573	GSE164788	SRA Run Selector	https://www.ncbi.nlm.nih.gov/Traces/study/?acc=SRX9834170	SRX9834170	Clemens Hug	Jan 14, 2021
GSM5019149	dge2_C05 RNA-seq of ReNcell VM treated with 10 uM nintedanib	SRA	Homo sapiens	1	GPL18573	GSE164788	SRA Run Selector	https://www.ncbi.nlm.nih.gov/Traces/study/?acc=SRX9834171	SRX9834171	Clemens Hug	Jan 14, 2021
GSM5019150	dge2_C06 RNA-seq of ReNcell VM treated with 10 uM dasatinib	SRA	Homo sapiens	1	GPL18573	GSE164788	SRA Run Selector	https://www.ncbi.nlm.nih.gov/Traces/study/?acc=SRX9834172	SRX9834172	Clemens Hug	Jan 14, 2021
GSM5019151	dge2_C07 RNA-seq of ReNcell VM treated with 1 uM torin2	SRA	Homo sapiens	1	GPL18573	GSE164788	SRA Run Selector	https://www.ncbi.nlm.nih.gov/Traces/study/?acc=SRX9834173	SRX9834173	Clemens Hug	Jan 14, 2021
GSM5019152	dge2_C08 RNA-seq of ReNcell VM treated with 10 uM otssp167	SRA	Homo sapiens	1	GPL18573	GSE164788	SRA Run Selector	https://www.ncbi.nlm.nih.gov/Traces/study/?acc=SRX9834174	SRX9834174	Clemens Hug	Jan 14, 2021
GSM5019153	dge2_C09 RNA-seq of ReNcell VM treated with 10 uM celastrol	SRA	Homo sapiens	1	GPL18573	GSE164788	SRA Run Selector	https://www.ncbi.nlm.nih.gov/Traces/study/?acc=SRX9834198	SRX9834198	Clemens Hug	Jan 14, 2021
GSM5019154	dge2_C10 RNA-seq of ReNcell VM treated with 1 uM lapatinib	SRA	Homo sapiens	1	GPL18573	GSE164788	SRA Run Selector	https://www.ncbi.nlm.nih.gov/Traces/study/?acc=SRX9834199	SRX9834199	Clemens Hug	Jan 14, 2021
GSM5019155	dge2_C11 RNA-seq of ReNcell VM treated with 1 uM palbociclib	SRA	Homo sapiens	1	GPL18573	GSE164788	SRA Run Selector	https://www.ncbi.nlm.nih.gov/Traces/study/?acc=SRX9834200	SRX9834200	Clemens Hug	Jan 14, 2021
GSM5019156	dge2_C12 RNA-seq of ReNcell VM treated with 10 uM y-27632	SRA	Homo sapiens	1	GPL18573	GSE164788	SRA Run Selector	https://www.ncbi.nlm.nih.gov/Traces/study/?acc=SRX9834202	SRX9834202	Clemens Hug	Jan 14, 2021
GSM5019157	dge2_C13 RNA-seq of ReNcell VM treated with 1 uM plx-4720	SRA	Homo sapiens	1	GPL18573	GSE164788	SRA Run Selector	https://www.ncbi.nlm.nih.gov/Traces/study/?acc=SRX9834203	SRX9834203	Clemens Hug	Jan 14, 2021
GSM5019158	dge2_C14 RNA-seq of ReNcell VM treated with 1 uM gefitinib	SRA	Homo sapiens	1	GPL18573	GSE164788	SRA Run Selector	https://www.ncbi.nlm.nih.gov/Traces/study/?acc=SRX9834204	SRX9834204	Clemens Hug	Jan 14, 2021
GSM5019159	dge2_C15 RNA-seq of ReNcell VM treated with 10 uM kin001-111	SRA	Homo sapiens	1	GPL18573	GSE164788	SRA Run Selector	https://www.ncbi.nlm.nih.gov/Traces/study/?acc=SRX9834233	SRX9834233	Clemens Hug	Jan 14, 2021
GSM5019160	dge2_C16 RNA-seq of ReNcell VM treated with 1 uM otssp167	SRA	Homo sapiens	1	GPL18573	GSE164788	SRA Run Selector	https://www.ncbi.nlm.nih.gov/Traces/study/?acc=SRX9834234	SRX9834234	Clemens Hug	Jan 14, 2021
GSM5019161	dge2_C17 RNA-seq of ReNcell VM treated with 1 uM jwe-035	SRA	Homo sapiens	1	GPL18573	GSE164788	SRA Run Selector	https://www.ncbi.nlm.nih.gov/Traces/study/?acc=SRX9834235	SRX9834235	Clemens Hug	Jan 14, 2021
GSM5019162	dge2_C18 RNA-seq of ReNcell VM treated with 1 uM ceritinib	SRA	Homo sapiens	1	GPL18573	GSE164788	SRA Run Selector	https://www.ncbi.nlm.nih.gov/Traces/study/?acc=SRX9834236	SRX9834236	Clemens Hug	Jan 14, 2021
GSM5019163	dge2_C19 RNA-seq of ReNcell VM treated with 1 uM ponatinib	SRA	Homo sapiens	1	GPL18573	GSE164788	SRA Run Selector	https://www.ncbi.nlm.nih.gov/Traces/study/?acc=SRX9834241	SRX9834241	Clemens Hug	Jan 14, 2021
GSM5019164	dge2_C20 RNA-seq of ReNcell VM treated with 1 uM resveratrol	SRA	Homo sapiens	1	GPL18573	GSE164788	SRA Run Selector	https://www.ncbi.nlm.nih.gov/Traces/study/?acc=SRX9834242	SRX9834242	Clemens Hug	Jan 14, 2021
GSM5019165	dge2_C21 RNA-seq of ReNcell VM treated with 10 uM lapatinib	SRA	Homo sapiens	1	GPL18573	GSE164788	SRA Run Selector	https://www.ncbi.nlm.nih.gov/Traces/study/?acc=SRX9834243	SRX9834243	Clemens Hug	Jan 14, 2021
GSM5019166	dge2_C22 RNA-seq of ReNcell VM treated with 1 uM gefitinib	SRA	Homo sapiens	1	GPL18573	GSE164788	SRA Run Selector	https://www.ncbi.nlm.nih.gov/Traces/study/?acc=SRX9834254	SRX9834254	Clemens Hug	Jan 14, 2021
GSM5019167	dge2_C23 RNA-seq of ReNcell VM treated with 10 uM ceritinib	SRA	Homo sapiens	1	GPL18573	GSE164788	SRA Run Selector	https://www.ncbi.nlm.nih.gov/Traces/study/?acc=SRX9834255	SRX9834255	Clemens Hug	Jan 14, 2021
GSM5019168	dge2_C24 RNA-seq of ReNcell VM treated with 1 uM ikk16	SRA	Homo sapiens	1	GPL18573	GSE164788	SRA Run Selector	https://www.ncbi.nlm.nih.gov/Traces/study/?acc=SRX9834256	SRX9834256	Clemens Hug	Jan 14, 2021
GSM5019169	dge2_D01 RNA-seq of ReNcell VM treated with 10 uM jwe-035	SRA	Homo sapiens	1	GPL18573	GSE164788	SRA Run Selector	https://www.ncbi.nlm.nih.gov/Traces/study/?acc=SRX9834257	SRX9834257	Clemens Hug	Jan 14, 2021
GSM5019170	dge2_D02 RNA-seq of ReNcell VM treated with 1 uM nilotinib	SRA	Homo sapiens	1	GPL18573	GSE164788	SRA Run Selector	https://www.ncbi.nlm.nih.gov/Traces/study/?acc=SRX9834258	SRX9834258	Clemens Hug	Jan 14, 2021
GSM5019171	dge2_D03 RNA-seq of ReNcell VM treated with 10 uM ruxolitinib + dsRNA	SRA	Homo sapiens	1	GPL18573	GSE164788	SRA Run Selector	https://www.ncbi.nlm.nih.gov/Traces/study/?acc=SRX9834259	SRX9834259	Clemens Hug	Jan 14, 2021
GSM5019172	dge2_D04 RNA-seq of ReNcell VM treated with 10 uM erlotinib	SRA	Homo sapiens	1	GPL18573	GSE164788	SRA Run Selector	https://www.ncbi.nlm.nih.gov/Traces/study/?acc=SRX9834275	SRX9834275	Clemens Hug	Jan 14, 2021
GSM5019173	dge2_D05 RNA-seq of ReNcell VM treated with dmso	SRA	Homo sapiens	1	GPL18573	GSE164788	SRA Run Selector	https://www.ncbi.nlm.nih.gov/Traces/study/?acc=SRX9834276	SRX9834276	Clemens Hug	Jan 14, 2021
GSM5019174	dge2_D06 RNA-seq of ReNcell VM treated with 10 uM nilotinib	SRA	Homo sapiens	1	GPL18573	GSE164788	SRA Run Selector	https://www.ncbi.nlm.nih.gov/Traces/study/?acc=SRX9834277	SRX9834277	Clemens Hug	Jan 14, 2021
GSM5019175	dge2_D07 RNA-seq of ReNcell VM treated with 1 uM dactolisib	SRA	Homo sapiens	1	GPL18573	GSE164788	SRA Run Selector	https://www.ncbi.nlm.nih.gov/Traces/study/?acc=SRX9834278	SRX9834278	Clemens Hug	Jan 14, 2021
GSM5019176	dge2_D08 RNA-seq of ReNcell VM treated with 1 uM at9283	SRA	Homo sapiens	1	GPL18573	GSE164788	SRA Run Selector	https://www.ncbi.nlm.nih.gov/Traces/study/?acc=SRX9834280	SRX9834280	Clemens Hug	Jan 14, 2021
GSM5019177	dge2_D09 RNA-seq of ReNcell VM treated with 1 uM fedratinib + lipofectamine	SRA	Homo sapiens	1	GPL18573	GSE164788	SRA Run Selector	https://www.ncbi.nlm.nih.gov/Traces/study/?acc=SRX9834281	SRX9834281	Clemens Hug	Jan 14, 2021
GSM5019178	dge2_D10 RNA-seq of ReNcell VM treated with 1 uM vorinostat	SRA	Homo sapiens	1	GPL18573	GSE164788	SRA Run Selector	https://www.ncbi.nlm.nih.gov/Traces/study/?acc=SRX9834282	SRX9834282	Clemens Hug	Jan 14, 2021
GSM5019179	dge2_D11 RNA-seq of ReNcell VM treated with 10 uM ruxolitinib + dsRNA	SRA	Homo sapiens	1	GPL18573	GSE164788	SRA Run Selector	https://www.ncbi.nlm.nih.gov/Traces/study/?acc=SRX9834298	SRX9834298	Clemens Hug	Jan 14, 2021
GSM5019180	dge2_D12 RNA-seq of ReNcell VM treated with 10 uM ceritinib	SRA	Homo sapiens	1	GPL18573	GSE164788	SRA Run Selector	https://www.ncbi.nlm.nih.gov/Traces/study/?acc=SRX9834299	SRX9834299	Clemens Hug	Jan 14, 2021
GSM5019181	dge2_D13 RNA-seq of ReNcell VM treated with 10 uM gefitinib	SRA	Homo sapiens	1	GPL18573	GSE164788	SRA Run Selector	https://www.ncbi.nlm.nih.gov/Traces/study/?acc=SRX9834300	SRX9834300	Clemens Hug	Jan 14, 2021
GSM5019182	dge2_D14 RNA-seq of ReNcell VM treated with 1 uM azd-1480	SRA	Homo sapiens	1	GPL18573	GSE164788	SRA Run Selector	https://www.ncbi.nlm.nih.gov/Traces/study/?acc=SRX9834301	SRX9834301	Clemens Hug	Jan 14, 2021
GSM5019183	dge2_D15 RNA-seq of ReNcell VM treated with 1 uM regorafenib	SRA	Homo sapiens	1	GPL18573	GSE164788	SRA Run Selector	https://www.ncbi.nlm.nih.gov/Traces/study/?acc=SRX9834302	SRX9834302	Clemens Hug	Jan 14, 2021
GSM5019184	dge2_D16 RNA-seq of ReNcell VM treated with 1 uM erlotinib	SRA	Homo sapiens	1	GPL18573	GSE164788	SRA Run Selector	https://www.ncbi.nlm.nih.gov/Traces/study/?acc=SRX9834303	SRX9834303	Clemens Hug	Jan 14, 2021
GSM5019185	dge2_D17 RNA-seq of ReNcell VM treated with 10 uM ly2090314	SRA	Homo sapiens	1	GPL18573	GSE164788	SRA Run Selector	https://www.ncbi.nlm.nih.gov/Traces/study/?acc=SRX9834304	SRX9834304	Clemens Hug	Jan 14, 2021
GSM5019186	dge2_D18 RNA-seq of ReNcell VM treated with 1 uM bix 02565	SRA	Homo sapiens	1	GPL18573	GSE164788	SRA Run Selector	https://www.ncbi.nlm.nih.gov/Traces/study/?acc=SRX9834411	SRX9834411	Clemens Hug	Jan 14, 2021
GSM5019187	dge2_D19 RNA-seq of ReNcell VM treated with 1 uM bix 02565	SRA	Homo sapiens	1	GPL18573	GSE164788	SRA Run Selector	https://www.ncbi.nlm.nih.gov/Traces/study/?acc=SRX9834399	SRX9834399	Clemens Hug	Jan 14, 2021
GSM5019188	dge2_D20 RNA-seq of ReNcell VM treated with 10 uM xl019 + lipofectamine	SRA	Homo sapiens	1	GPL18573	GSE164788	SRA Run Selector	https://www.ncbi.nlm.nih.gov/Traces/study/?acc=SRX9834400	SRX9834400	Clemens Hug	Jan 14, 2021
GSM5019189	dge2_D21 RNA-seq of ReNcell VM treated with 10 uM azd1480 + dsRNA	SRA	Homo sapiens	1	GPL18573	GSE164788	SRA Run Selector	https://www.ncbi.nlm.nih.gov/Traces/study/?acc=SRX9834401	SRX9834401	Clemens Hug	Jan 14, 2021
GSM5019190	dge2_D22 RNA-seq of ReNcell VM treated with 10 uM azd1480 + lipofectamine	SRA	Homo sapiens	1	GPL18573	GSE164788	SRA Run Selector	https://www.ncbi.nlm.nih.gov/Traces/study/?acc=SRX9834402	SRX9834402	Clemens Hug	Jan 14, 2021
GSM5019191	dge2_D23 RNA-seq of ReNcell VM treated with 1 uM dovitinib	SRA	Homo sapiens	1	GPL18573	GSE164788	SRA Run Selector	https://www.ncbi.nlm.nih.gov/Traces/study/?acc=SRX9834403	SRX9834403	Clemens Hug	Jan 14, 2021
GSM5019192	dge2_D24 RNA-seq of ReNcell VM treated with 10 uM tofacitinib	SRA	Homo sapiens	1	GPL18573	GSE164788	SRA Run Selector	https://www.ncbi.nlm.nih.gov/Traces/study/?acc=SRX9834422	SRX9834422	Clemens Hug	Jan 14, 2021
GSM5019193	dge2_E01 RNA-seq of ReNcell VM treated with dsRNA	SRA	Homo sapiens	1	GPL18573	GSE164788	SRA Run Selector	https://www.ncbi.nlm.nih.gov/Traces/study/?acc=SRX9834423	SRX9834423	Clemens Hug	Jan 14, 2021
GSM5019194	dge2_E02 RNA-seq of ReNcell VM treated with 1 uM tofacitinib	SRA	Homo sapiens	1	GPL18573	GSE164788	SRA Run Selector	https://www.ncbi.nlm.nih.gov/Traces/study/?acc=SRX9834424	SRX9834424	Clemens Hug	Jan 14, 2021
GSM5019195	dge2_E03 RNA-seq of ReNcell VM treated with 1 uM ibrutinib	SRA	Homo sapiens	1	GPL18573	GSE164788	SRA Run Selector	https://www.ncbi.nlm.nih.gov/Traces/study/?acc=SRX9834425	SRX9834425	Clemens Hug	Jan 14, 2021
GSM5019196	dge2_E04 RNA-seq of ReNcell VM treated with 10 uM belinostat	SRA	Homo sapiens	1	GPL18573	GSE164788	SRA Run Selector	https://www.ncbi.nlm.nih.gov/Traces/study/?acc=SRX9834427	SRX9834427	Clemens Hug	Jan 14, 2021
GSM5019197	dge2_E05 RNA-seq of ReNcell VM treated with 10 uM afatinib	SRA	Homo sapiens	1	GPL18573	GSE164788	SRA Run Selector	https://www.ncbi.nlm.nih.gov/Traces/study/?acc=SRX9834428	SRX9834428	Clemens Hug	Jan 14, 2021
GSM5019198	dge2_E06 RNA-seq of ReNcell VM treated with 1 uM xmd16-144	SRA	Homo sapiens	1	GPL18573	GSE164788	SRA Run Selector	https://www.ncbi.nlm.nih.gov/Traces/study/?acc=SRX9834436	SRX9834436	Clemens Hug	Jan 14, 2021
GSM5019199	dge2_E07 RNA-seq of ReNcell VM treated with 10 uM pelitinib	SRA	Homo sapiens	1	GPL18573	GSE164788	SRA Run Selector	https://www.ncbi.nlm.nih.gov/Traces/study/?acc=SRX9834437	SRX9834437	Clemens Hug	Jan 14, 2021
GSM5019200	dge2_E08 RNA-seq of ReNcell VM treated with 10 uM regorafenib	SRA	Homo sapiens	1	GPL18573	GSE164788	SRA Run Selector	https://www.ncbi.nlm.nih.gov/Traces/study/?acc=SRX9834438	SRX9834438	Clemens Hug	Jan 14, 2021
GSM5019201	dge2_E09 RNA-seq of ReNcell VM treated with 10 uM ruxolitinib	SRA	Homo sapiens	1	GPL18573	GSE164788	SRA Run Selector	https://www.ncbi.nlm.nih.gov/Traces/study/?acc=SRX9834439	SRX9834439	Clemens Hug	Jan 14, 2021
GSM5019202	dge2_E10 RNA-seq of ReNcell VM treated with 10 uM sorafenib	SRA	Homo sapiens	1	GPL18573	GSE164788	SRA Run Selector	https://www.ncbi.nlm.nih.gov/Traces/study/?acc=SRX9834440	SRX9834440	Clemens Hug	Jan 14, 2021
GSM5019203	dge2_E11 RNA-seq of ReNcell VM treated with 10 uM pf-06463922	SRA	Homo sapiens	1	GPL18573	GSE164788	SRA Run Selector	https://www.ncbi.nlm.nih.gov/Traces/study/?acc=SRX9834441	SRX9834441	Clemens Hug	Jan 14, 2021
GSM5019204	dge2_E12 RNA-seq of ReNcell VM treated with 10 uM neratinib	SRA	Homo sapiens	1	GPL18573	GSE164788	SRA Run Selector	https://www.ncbi.nlm.nih.gov/Traces/study/?acc=SRX9834442	SRX9834442	Clemens Hug	Jan 14, 2021
GSM5019205	dge2_E13 RNA-seq of ReNcell VM treated with 10 uM dactolisib	SRA	Homo sapiens	1	GPL18573	GSE164788	SRA Run Selector	https://www.ncbi.nlm.nih.gov/Traces/study/?acc=SRX9834451	SRX9834451	Clemens Hug	Jan 14, 2021
GSM5019206	dge2_E14 RNA-seq of ReNcell VM treated with dmso	SRA	Homo sapiens	1	GPL18573	GSE164788	SRA Run Selector	https://www.ncbi.nlm.nih.gov/Traces/study/?acc=SRX9834453	SRX9834453	Clemens Hug	Jan 14, 2021
GSM5019207	dge2_E15 RNA-seq of ReNcell VM treated with 10 uM mrt67307	SRA	Homo sapiens	1	GPL18573	GSE164788	SRA Run Selector	https://www.ncbi.nlm.nih.gov/Traces/study/?acc=SRX9834454	SRX9834454	Clemens Hug	Jan 14, 2021
GSM5019208	dge2_E16 RNA-seq of ReNcell VM treated with 10 uM h89	SRA	Homo sapiens	1	GPL18573	GSE164788	SRA Run Selector	https://www.ncbi.nlm.nih.gov/Traces/study/?acc=SRX9834455	SRX9834455	Clemens Hug	Jan 14, 2021
GSM5019209	dge2_E17 RNA-seq of ReNcell VM treated with 10 uM dovitinib	SRA	Homo sapiens	1	GPL18573	GSE164788	SRA Run Selector	https://www.ncbi.nlm.nih.gov/Traces/study/?acc=SRX9834456	SRX9834456	Clemens Hug	Jan 14, 2021
GSM5019210	dge2_E18 RNA-seq of ReNcell VM treated with 1 uM h89	SRA	Homo sapiens	1	GPL18573	GSE164788	SRA Run Selector	https://www.ncbi.nlm.nih.gov/Traces/study/?acc=SRX9834457	SRX9834457	Clemens Hug	Jan 14, 2021
GSM5019211	dge2_E19 RNA-seq of ReNcell VM treated with 10 uM ponatinib	SRA	Homo sapiens	1	GPL18573	GSE164788	SRA Run Selector	https://www.ncbi.nlm.nih.gov/Traces/study/?acc=SRX9834458	SRX9834458	Clemens Hug	Jan 14, 2021
GSM5019212	dge2_E20 RNA-seq of ReNcell VM treated with 10 uM bosutinib	SRA	Homo sapiens	1	GPL18573	GSE164788	SRA Run Selector	https://www.ncbi.nlm.nih.gov/Traces/study/?acc=SRX9834466	SRX9834466	Clemens Hug	Jan 14, 2021
GSM5019213	dge2_E21 RNA-seq of ReNcell VM treated with 1 uM kw2449	SRA	Homo sapiens	1	GPL18573	GSE164788	SRA Run Selector	https://www.ncbi.nlm.nih.gov/Traces/study/?acc=SRX9834467	SRX9834467	Clemens Hug	Jan 14, 2021
GSM5019214	dge2_E22 RNA-seq of ReNcell VM treated with 10 uM ruxolitinib + lipofectamine	SRA	Homo sapiens	1	GPL18573	GSE164788	SRA Run Selector	https://www.ncbi.nlm.nih.gov/Traces/study/?acc=SRX9834468	SRX9834468	Clemens Hug	Jan 14, 2021
GSM5019215	dge2_E23 RNA-seq of ReNcell VM treated with 1 uM xmd16-144	SRA	Homo sapiens	1	GPL18573	GSE164788	SRA Run Selector	https://www.ncbi.nlm.nih.gov/Traces/study/?acc=SRX9834469	SRX9834469	Clemens Hug	Jan 14, 2021
GSM5019216	dge2_E24 RNA-seq of ReNcell VM treated with 10 uM tofacitinib	SRA	Homo sapiens	1	GPL18573	GSE164788	SRA Run Selector	https://www.ncbi.nlm.nih.gov/Traces/study/?acc=SRX9834472	SRX9834472	Clemens Hug	Jan 14, 2021
GSM5019217	dge2_F01 RNA-seq of ReNcell VM treated with 1 uM regorafenib	SRA	Homo sapiens	1	GPL18573	GSE164788	SRA Run Selector	https://www.ncbi.nlm.nih.gov/Traces/study/?acc=SRX9833844	SRX9833844	Clemens Hug	Jan 14, 2021
GSM5019218	dge2_F02 RNA-seq of ReNcell VM treated with 10 uM otssp167	SRA	Homo sapiens	1	GPL18573	GSE164788	SRA Run Selector	https://www.ncbi.nlm.nih.gov/Traces/study/?acc=SRX9833845	SRX9833845	Clemens Hug	Jan 14, 2021
GSM5019219	dge2_F03 RNA-seq of ReNcell VM treated with 10 uM xl019 + lipofectamine	SRA	Homo sapiens	1	GPL18573	GSE164788	SRA Run Selector	https://www.ncbi.nlm.nih.gov/Traces/study/?acc=SRX9833788	SRX9833788	Clemens Hug	Jan 14, 2021
GSM5019220	dge2_F04 RNA-seq of ReNcell VM treated with 10 uM vorinostat	SRA	Homo sapiens	1	GPL18573	GSE164788	SRA Run Selector	https://www.ncbi.nlm.nih.gov/Traces/study/?acc=SRX9833789	SRX9833789	Clemens Hug	Jan 14, 2021
GSM5019221	dge2_F05 RNA-seq of ReNcell VM treated with 1 uM ly2090314	SRA	Homo sapiens	1	GPL18573	GSE164788	SRA Run Selector	https://www.ncbi.nlm.nih.gov/Traces/study/?acc=SRX9833790	SRX9833790	Clemens Hug	Jan 14, 2021
GSM5019222	dge2_F06 RNA-seq of ReNcell VM treated with 10 uM canertinib	SRA	Homo sapiens	1	GPL18573	GSE164788	SRA Run Selector	https://www.ncbi.nlm.nih.gov/Traces/study/?acc=SRX9833791	SRX9833791	Clemens Hug	Jan 14, 2021
GSM5019223	dge2_F07 RNA-seq of ReNcell VM treated with 10 uM dabrafenib	SRA	Homo sapiens	1	GPL18573	GSE164788	SRA Run Selector	https://www.ncbi.nlm.nih.gov/Traces/study/?acc=SRX9833792	SRX9833792	Clemens Hug	Jan 14, 2021
GSM5019224	dge2_F08 RNA-seq of ReNcell VM treated with 10 uM sunitinib	SRA	Homo sapiens	1	GPL18573	GSE164788	SRA Run Selector	https://www.ncbi.nlm.nih.gov/Traces/study/?acc=SRX9833800	SRX9833800	Clemens Hug	Jan 14, 2021
GSM5019225	dge2_F09 RNA-seq of ReNcell VM treated with dmso	SRA	Homo sapiens	1	GPL18573	GSE164788	SRA Run Selector	https://www.ncbi.nlm.nih.gov/Traces/study/?acc=SRX9833801	SRX9833801	Clemens Hug	Jan 14, 2021
GSM5019226	dge2_F10 RNA-seq of ReNcell VM treated with 10 uM az-628	SRA	Homo sapiens	1	GPL18573	GSE164788	SRA Run Selector	https://www.ncbi.nlm.nih.gov/Traces/study/?acc=SRX9833803	SRX9833803	Clemens Hug	Jan 14, 2021
GSM5019227	dge2_F11 RNA-seq of ReNcell VM treated with 1 uM ibrutinib	SRA	Homo sapiens	1	GPL18573	GSE164788	SRA Run Selector	https://www.ncbi.nlm.nih.gov/Traces/study/?acc=SRX9833804	SRX9833804	Clemens Hug	Jan 14, 2021
GSM5019228	dge2_F12 RNA-seq of ReNcell VM treated with 1 uM crizotinib	SRA	Homo sapiens	1	GPL18573	GSE164788	SRA Run Selector	https://www.ncbi.nlm.nih.gov/Traces/study/?acc=SRX9833805	SRX9833805	Clemens Hug	Jan 14, 2021
GSM5019229	dge2_F13 RNA-seq of ReNcell VM treated with 1 uM y-27632	SRA	Homo sapiens	1	GPL18573	GSE164788	SRA Run Selector	https://www.ncbi.nlm.nih.gov/Traces/study/?acc=SRX9833806	SRX9833806	Clemens Hug	Jan 14, 2021
GSM5019230	dge2_F14 RNA-seq of ReNcell VM treated with 10 uM fedratinib	SRA	Homo sapiens	1	GPL18573	GSE164788	SRA Run Selector	https://www.ncbi.nlm.nih.gov/Traces/study/?acc=SRX9833814	SRX9833814	Clemens Hug	Jan 14, 2021
GSM5019231	dge2_F15 RNA-seq of ReNcell VM treated with 1 uM crizotinib	SRA	Homo sapiens	1	GPL18573	GSE164788	SRA Run Selector	https://www.ncbi.nlm.nih.gov/Traces/study/?acc=SRX9833815	SRX9833815	Clemens Hug	Jan 14, 2021
GSM5019232	dge2_F16 RNA-seq of ReNcell VM treated with 10 uM canertinib	SRA	Homo sapiens	1	GPL18573	GSE164788	SRA Run Selector	https://www.ncbi.nlm.nih.gov/Traces/study/?acc=SRX9833816	SRX9833816	Clemens Hug	Jan 14, 2021
GSM5019233	dge2_F17 RNA-seq of ReNcell VM treated with 1 uM rucaparib	SRA	Homo sapiens	1	GPL18573	GSE164788	SRA Run Selector	https://www.ncbi.nlm.nih.gov/Traces/study/?acc=SRX9833817	SRX9833817	Clemens Hug	Jan 14, 2021
GSM5019234	dge2_F18 RNA-seq of ReNcell VM treated with 10 uM rucaparib	SRA	Homo sapiens	1	GPL18573	GSE164788	SRA Run Selector	https://www.ncbi.nlm.nih.gov/Traces/study/?acc=SRX9833818	SRX9833818	Clemens Hug	Jan 14, 2021
GSM5019235	dge2_F19 RNA-seq of ReNcell VM treated with 10 uM axitinib	SRA	Homo sapiens	1	GPL18573	GSE164788	SRA Run Selector	https://www.ncbi.nlm.nih.gov/Traces/study/?acc=SRX9833819	SRX9833819	Clemens Hug	Jan 14, 2021
GSM5019236	dge2_F20 RNA-seq of ReNcell VM treated with 1 uM resveratrol	SRA	Homo sapiens	1	GPL18573	GSE164788	SRA Run Selector	https://www.ncbi.nlm.nih.gov/Traces/study/?acc=SRX9833821	SRX9833821	Clemens Hug	Jan 14, 2021
GSM5019237	dge2_F21 RNA-seq of ReNcell VM treated with 10 uM dasatinib	SRA	Homo sapiens	1	GPL18573	GSE164788	SRA Run Selector	https://www.ncbi.nlm.nih.gov/Traces/study/?acc=SRX9833822	SRX9833822	Clemens Hug	Jan 14, 2021
GSM5019238	dge2_F22 RNA-seq of ReNcell VM treated with 10 uM pelitinib	SRA	Homo sapiens	1	GPL18573	GSE164788	SRA Run Selector	https://www.ncbi.nlm.nih.gov/Traces/study/?acc=SRX9833823	SRX9833823	Clemens Hug	Jan 14, 2021
GSM5019239	dge2_F23 RNA-seq of ReNcell VM treated with 1 uM at9283	SRA	Homo sapiens	1	GPL18573	GSE164788	SRA Run Selector	https://www.ncbi.nlm.nih.gov/Traces/study/?acc=SRX9833824	SRX9833824	Clemens Hug	Jan 14, 2021
GSM5019240	dge2_F24 RNA-seq of ReNcell VM treated with 1 uM az-628	SRA	Homo sapiens	1	GPL18573	GSE164788	SRA Run Selector	https://www.ncbi.nlm.nih.gov/Traces/study/?acc=SRX9833825	SRX9833825	Clemens Hug	Jan 14, 2021
GSM5019241	dge2_G01 RNA-seq of ReNcell VM treated with 10 uM fedratinib	SRA	Homo sapiens	1	GPL18573	GSE164788	SRA Run Selector	https://www.ncbi.nlm.nih.gov/Traces/study/?acc=SRX9833826	SRX9833826	Clemens Hug	Jan 14, 2021
GSM5019242	dge2_G02 RNA-seq of ReNcell VM treated with 10 uM vandetanib	SRA	Homo sapiens	1	GPL18573	GSE164788	SRA Run Selector	https://www.ncbi.nlm.nih.gov/Traces/study/?acc=SRX9833827	SRX9833827	Clemens Hug	Jan 14, 2021
GSM5019243	dge2_G03 RNA-seq of ReNcell VM treated with 10 uM enzastaurin	SRA	Homo sapiens	1	GPL18573	GSE164788	SRA Run Selector	https://www.ncbi.nlm.nih.gov/Traces/study/?acc=SRX9833828	SRX9833828	Clemens Hug	Jan 14, 2021
GSM5019244	dge2_G04 RNA-seq of ReNcell VM treated with 10 uM sorafenib	SRA	Homo sapiens	1	GPL18573	GSE164788	SRA Run Selector	https://www.ncbi.nlm.nih.gov/Traces/study/?acc=SRX9833849	SRX9833849	Clemens Hug	Jan 14, 2021
GSM5019245	dge2_G05 RNA-seq of ReNcell VM treated with 1 uM baricitinib + lipofectamine	SRA	Homo sapiens	1	GPL18573	GSE164788	SRA Run Selector	https://www.ncbi.nlm.nih.gov/Traces/study/?acc=SRX9833850	SRX9833850	Clemens Hug	Jan 14, 2021
GSM5019246	dge2_G06 RNA-seq of ReNcell VM treated with 10 uM dactolisib	SRA	Homo sapiens	1	GPL18573	GSE164788	SRA Run Selector	https://www.ncbi.nlm.nih.gov/Traces/study/?acc=SRX9833852	SRX9833852	Clemens Hug	Jan 14, 2021
GSM5019247	dge2_G07 RNA-seq of ReNcell VM treated with 1 uM vandetanib	SRA	Homo sapiens	1	GPL18573	GSE164788	SRA Run Selector	https://www.ncbi.nlm.nih.gov/Traces/study/?acc=SRX9833853	SRX9833853	Clemens Hug	Jan 14, 2021
GSM5019248	dge2_G08 RNA-seq of ReNcell VM treated with 1 uM fedratinib	SRA	Homo sapiens	1	GPL18573	GSE164788	SRA Run Selector	https://www.ncbi.nlm.nih.gov/Traces/study/?acc=SRX9833854	SRX9833854	Clemens Hug	Jan 14, 2021
GSM5019249	dge2_G09 RNA-seq of ReNcell VM treated with 10 uM tofacitinib + lipofectamine	SRA	Homo sapiens	1	GPL18573	GSE164788	SRA Run Selector	https://www.ncbi.nlm.nih.gov/Traces/study/?acc=SRX9833855	SRX9833855	Clemens Hug	Jan 14, 2021
GSM5019250	dge2_G10 RNA-seq of ReNcell VM treated with 10 uM belinostat	SRA	Homo sapiens	1	GPL18573	GSE164788	SRA Run Selector	https://www.ncbi.nlm.nih.gov/Traces/study/?acc=SRX9833856	SRX9833856	Clemens Hug	Jan 14, 2021
GSM5019251	dge2_G11 RNA-seq of ReNcell VM treated with 10 uM baricitinib + dsRNA	SRA	Homo sapiens	1	GPL18573	GSE164788	SRA Run Selector	https://www.ncbi.nlm.nih.gov/Traces/study/?acc=SRX9833857	SRX9833857	Clemens Hug	Jan 14, 2021
GSM5019252	dge2_G12 RNA-seq of ReNcell VM treated with 1 uM az-628	SRA	Homo sapiens	1	GPL18573	GSE164788	SRA Run Selector	https://www.ncbi.nlm.nih.gov/Traces/study/?acc=SRX9833858	SRX9833858	Clemens Hug	Jan 14, 2021
GSM5019253	dge2_G13 RNA-seq of ReNcell VM treated with 10 uM baricitinib	SRA	Homo sapiens	1	GPL18573	GSE164788	SRA Run Selector	https://www.ncbi.nlm.nih.gov/Traces/study/?acc=SRX9833859	SRX9833859	Clemens Hug	Jan 14, 2021
GSM5019254	dge2_G14 RNA-seq of ReNcell VM treated with 1 uM lapatinib	SRA	Homo sapiens	1	GPL18573	GSE164788	SRA Run Selector	https://www.ncbi.nlm.nih.gov/Traces/study/?acc=SRX9833860	SRX9833860	Clemens Hug	Jan 14, 2021
GSM5019255	dge2_G15 RNA-seq of ReNcell VM treated with 1 uM nintedanib	SRA	Homo sapiens	1	GPL18573	GSE164788	SRA Run Selector	https://www.ncbi.nlm.nih.gov/Traces/study/?acc=SRX9833861	SRX9833861	Clemens Hug	Jan 14, 2021
GSM5019256	dge2_G16 RNA-seq of ReNcell VM treated with 10 uM azd-1480	SRA	Homo sapiens	1	GPL18573	GSE164788	SRA Run Selector	https://www.ncbi.nlm.nih.gov/Traces/study/?acc=SRX9833870	SRX9833870	Clemens Hug	Jan 14, 2021
GSM5019257	dge2_G17 RNA-seq of ReNcell VM treated with 1 uM ceritinib	SRA	Homo sapiens	1	GPL18573	GSE164788	SRA Run Selector	https://www.ncbi.nlm.nih.gov/Traces/study/?acc=SRX9833871	SRX9833871	Clemens Hug	Jan 14, 2021
GSM5019258	dge2_G18 RNA-seq of ReNcell VM treated with 10 uM neratinib	SRA	Homo sapiens	1	GPL18573	GSE164788	SRA Run Selector	https://www.ncbi.nlm.nih.gov/Traces/study/?acc=SRX9833872	SRX9833872	Clemens Hug	Jan 14, 2021
GSM5019259	dge2_G19 RNA-seq of ReNcell VM treated with 10 uM dasatinib	SRA	Homo sapiens	1	GPL18573	GSE164788	SRA Run Selector	https://www.ncbi.nlm.nih.gov/Traces/study/?acc=SRX9833873	SRX9833873	Clemens Hug	Jan 14, 2021
GSM5019260	dge2_G20 RNA-seq of ReNcell VM treated with 10 uM tofacitinib	SRA	Homo sapiens	1	GPL18573	GSE164788	SRA Run Selector	https://www.ncbi.nlm.nih.gov/Traces/study/?acc=SRX9833874	SRX9833874	Clemens Hug	Jan 14, 2021
GSM5019261	dge2_G21 RNA-seq of ReNcell VM treated with 10 uM celastrol	SRA	Homo sapiens	1	GPL18573	GSE164788	SRA Run Selector	https://www.ncbi.nlm.nih.gov/Traces/study/?acc=SRX9833875	SRX9833875	Clemens Hug	Jan 14, 2021
GSM5019262	dge2_G22 RNA-seq of ReNcell VM treated with 10 uM staurosporine aglycone	SRA	Homo sapiens	1	GPL18573	GSE164788	SRA Run Selector	https://www.ncbi.nlm.nih.gov/Traces/study/?acc=SRX9833876	SRX9833876	Clemens Hug	Jan 14, 2021
GSM5019263	dge2_G23 RNA-seq of ReNcell VM treated with 1 uM jwe-035	SRA	Homo sapiens	1	GPL18573	GSE164788	SRA Run Selector	https://www.ncbi.nlm.nih.gov/Traces/study/?acc=SRX9833885	SRX9833885	Clemens Hug	Jan 14, 2021
GSM5019264	dge2_G24 RNA-seq of ReNcell VM treated with 10 uM crizotinib	SRA	Homo sapiens	1	GPL18573	GSE164788	SRA Run Selector	https://www.ncbi.nlm.nih.gov/Traces/study/?acc=SRX9833886	SRX9833886	Clemens Hug	Jan 14, 2021
GSM5019265	dge2_H01 RNA-seq of ReNcell VM treated with 1 uM sunitinib	SRA	Homo sapiens	1	GPL18573	GSE164788	SRA Run Selector	https://www.ncbi.nlm.nih.gov/Traces/study/?acc=SRX9833887	SRX9833887	Clemens Hug	Jan 14, 2021
GSM5019266	dge2_H02 RNA-seq of ReNcell VM treated with 10 uM belinostat	SRA	Homo sapiens	1	GPL18573	GSE164788	SRA Run Selector	https://www.ncbi.nlm.nih.gov/Traces/study/?acc=SRX9833889	SRX9833889	Clemens Hug	Jan 14, 2021
GSM5019267	dge2_H03 RNA-seq of ReNcell VM treated with 1 uM belinostat	SRA	Homo sapiens	1	GPL18573	GSE164788	SRA Run Selector	https://www.ncbi.nlm.nih.gov/Traces/study/?acc=SRX9833890	SRX9833890	Clemens Hug	Jan 14, 2021
GSM5019268	dge2_H04 RNA-seq of ReNcell VM treated with 10 uM bosutinib	SRA	Homo sapiens	1	GPL18573	GSE164788	SRA Run Selector	https://www.ncbi.nlm.nih.gov/Traces/study/?acc=SRX9833891	SRX9833891	Clemens Hug	Jan 14, 2021
GSM5019269	dge2_H05 RNA-seq of ReNcell VM treated with 10 uM torin2	SRA	Homo sapiens	1	GPL18573	GSE164788	SRA Run Selector	https://www.ncbi.nlm.nih.gov/Traces/study/?acc=SRX9833892	SRX9833892	Clemens Hug	Jan 14, 2021
GSM5019270	dge2_H06 RNA-seq of ReNcell VM treated with 1 uM dovitinib	SRA	Homo sapiens	1	GPL18573	GSE164788	SRA Run Selector	https://www.ncbi.nlm.nih.gov/Traces/study/?acc=SRX9833893	SRX9833893	Clemens Hug	Jan 14, 2021
GSM5019271	dge2_H07 RNA-seq of ReNcell VM treated with 10 uM azd1480 + dsRNA	SRA	Homo sapiens	1	GPL18573	GSE164788	SRA Run Selector	https://www.ncbi.nlm.nih.gov/Traces/study/?acc=SRX9833894	SRX9833894	Clemens Hug	Jan 14, 2021
GSM5019272	dge2_H08 RNA-seq of ReNcell VM treated with 1 uM staurosporine aglycone	SRA	Homo sapiens	1	GPL18573	GSE164788	SRA Run Selector	https://www.ncbi.nlm.nih.gov/Traces/study/?acc=SRX9833895	SRX9833895	Clemens Hug	Jan 14, 2021
GSM5019273	dge2_H09 RNA-seq of ReNcell VM treated with 10 uM at9283	SRA	Homo sapiens	1	GPL18573	GSE164788	SRA Run Selector	https://www.ncbi.nlm.nih.gov/Traces/study/?acc=SRX9833896	SRX9833896	Clemens Hug	Jan 14, 2021
GSM5019274	dge2_H10 RNA-seq of ReNcell VM treated with 10 uM xl019	SRA	Homo sapiens	1	GPL18573	GSE164788	SRA Run Selector	https://www.ncbi.nlm.nih.gov/Traces/study/?acc=SRX9833897	SRX9833897	Clemens Hug	Jan 14, 2021
GSM5019275	dge2_H11 RNA-seq of ReNcell VM treated with 1 uM palbociclib	SRA	Homo sapiens	1	GPL18573	GSE164788	SRA Run Selector	https://www.ncbi.nlm.nih.gov/Traces/study/?acc=SRX9833898	SRX9833898	Clemens Hug	Jan 14, 2021
GSM5019276	dge2_H12 RNA-seq of ReNcell VM treated with 10 uM crizotinib	SRA	Homo sapiens	1	GPL18573	GSE164788	SRA Run Selector	https://www.ncbi.nlm.nih.gov/Traces/study/?acc=SRX9833900	SRX9833900	Clemens Hug	Jan 14, 2021
GSM5019277	dge2_H13 RNA-seq of ReNcell VM treated with 1 uM axitinib	SRA	Homo sapiens	1	GPL18573	GSE164788	SRA Run Selector	https://www.ncbi.nlm.nih.gov/Traces/study/?acc=SRX9833901	SRX9833901	Clemens Hug	Jan 14, 2021
GSM5019278	dge2_H14 RNA-seq of ReNcell VM treated with 10 uM nilotinib	SRA	Homo sapiens	1	GPL18573	GSE164788	SRA Run Selector	https://www.ncbi.nlm.nih.gov/Traces/study/?acc=SRX9833902	SRX9833902	Clemens Hug	Jan 14, 2021
GSM5019279	dge2_H15 RNA-seq of ReNcell VM treated with 1 uM tofacitinib	SRA	Homo sapiens	1	GPL18573	GSE164788	SRA Run Selector	https://www.ncbi.nlm.nih.gov/Traces/study/?acc=SRX9833903	SRX9833903	Clemens Hug	Jan 14, 2021
GSM5019280	dge2_H16 RNA-seq of ReNcell VM treated with 10 uM dabrafenib	SRA	Homo sapiens	1	GPL18573	GSE164788	SRA Run Selector	https://www.ncbi.nlm.nih.gov/Traces/study/?acc=SRX9833904	SRX9833904	Clemens Hug	Jan 14, 2021
GSM5019281	dge2_H17 RNA-seq of ReNcell VM treated with 1 uM dovitinib	SRA	Homo sapiens	1	GPL18573	GSE164788	SRA Run Selector	https://www.ncbi.nlm.nih.gov/Traces/study/?acc=SRX9833905	SRX9833905	Clemens Hug	Jan 14, 2021
GSM5019282	dge2_H18 RNA-seq of ReNcell VM treated with 10 uM sunitinib	SRA	Homo sapiens	1	GPL18573	GSE164788	SRA Run Selector	https://www.ncbi.nlm.nih.gov/Traces/study/?acc=SRX9833906	SRX9833906	Clemens Hug	Jan 14, 2021
GSM5019283	dge2_H19 RNA-seq of ReNcell VM treated with 1 uM pelitinib	SRA	Homo sapiens	1	GPL18573	GSE164788	SRA Run Selector	https://www.ncbi.nlm.nih.gov/Traces/study/?acc=SRX9833939	SRX9833939	Clemens Hug	Jan 14, 2021
GSM5019284	dge2_H20 RNA-seq of ReNcell VM treated with 1 uM ruxolitinib	SRA	Homo sapiens	1	GPL18573	GSE164788	SRA Run Selector	https://www.ncbi.nlm.nih.gov/Traces/study/?acc=SRX9833940	SRX9833940	Clemens Hug	Jan 14, 2021
GSM5019285	dge2_H21 RNA-seq of ReNcell VM treated with 10 uM tofacitinib + lipofectamine	SRA	Homo sapiens	1	GPL18573	GSE164788	SRA Run Selector	https://www.ncbi.nlm.nih.gov/Traces/study/?acc=SRX9833925	SRX9833925	Clemens Hug	Jan 14, 2021
GSM5019286	dge2_H22 RNA-seq of ReNcell VM treated with 10 uM neratinib	SRA	Homo sapiens	1	GPL18573	GSE164788	SRA Run Selector	https://www.ncbi.nlm.nih.gov/Traces/study/?acc=SRX9833927	SRX9833927	Clemens Hug	Jan 14, 2021
GSM5019287	dge2_H23 RNA-seq of ReNcell VM treated with dmso	SRA	Homo sapiens	1	GPL18573	GSE164788	SRA Run Selector	https://www.ncbi.nlm.nih.gov/Traces/study/?acc=SRX9833928	SRX9833928	Clemens Hug	Jan 14, 2021
GSM5019288	dge2_H24 RNA-seq of ReNcell VM treated with 1 uM celastrol	SRA	Homo sapiens	1	GPL18573	GSE164788	SRA Run Selector	https://www.ncbi.nlm.nih.gov/Traces/study/?acc=SRX9833929	SRX9833929	Clemens Hug	Jan 14, 2021
GSM5019289	dge2_I01 RNA-seq of ReNcell VM treated with 10 uM vandetanib	SRA	Homo sapiens	1	GPL18573	GSE164788	SRA Run Selector	https://www.ncbi.nlm.nih.gov/Traces/study/?acc=SRX9834093	SRX9834093	Clemens Hug	Jan 14, 2021
GSM5019290	dge2_I02 RNA-seq of ReNcell VM treated with 1 uM otssp167	SRA	Homo sapiens	1	GPL18573	GSE164788	SRA Run Selector	https://www.ncbi.nlm.nih.gov/Traces/study/?acc=SRX9834094	SRX9834094	Clemens Hug	Jan 14, 2021
GSM5019291	dge2_I03 RNA-seq of ReNcell VM treated with 1 uM az-628	SRA	Homo sapiens	1	GPL18573	GSE164788	SRA Run Selector	https://www.ncbi.nlm.nih.gov/Traces/study/?acc=SRX9834095	SRX9834095	Clemens Hug	Jan 14, 2021
GSM5019292	dge2_I04 RNA-seq of ReNcell VM treated with 1 uM bosutinib	SRA	Homo sapiens	1	GPL18573	GSE164788	SRA Run Selector	https://www.ncbi.nlm.nih.gov/Traces/study/?acc=SRX9834096	SRX9834096	Clemens Hug	Jan 14, 2021
GSM5019293	dge2_I05 RNA-seq of ReNcell VM treated with 1 uM plx-4720	SRA	Homo sapiens	1	GPL18573	GSE164788	SRA Run Selector	https://www.ncbi.nlm.nih.gov/Traces/study/?acc=SRX9834117	SRX9834117	Clemens Hug	Jan 14, 2021
GSM5019294	dge2_I06 RNA-seq of ReNcell VM treated with 10 uM vandetanib	SRA	Homo sapiens	1	GPL18573	GSE164788	SRA Run Selector	https://www.ncbi.nlm.nih.gov/Traces/study/?acc=SRX9834118	SRX9834118	Clemens Hug	Jan 14, 2021
GSM5019295	dge2_I07 RNA-seq of ReNcell VM treated with 1 uM h89	SRA	Homo sapiens	1	GPL18573	GSE164788	SRA Run Selector	https://www.ncbi.nlm.nih.gov/Traces/study/?acc=SRX9834119	SRX9834119	Clemens Hug	Jan 14, 2021
GSM5019296	dge2_I08 RNA-seq of ReNcell VM treated with 1 uM at9283	SRA	Homo sapiens	1	GPL18573	GSE164788	SRA Run Selector	https://www.ncbi.nlm.nih.gov/Traces/study/?acc=SRX9834112	SRX9834112	Clemens Hug	Jan 14, 2021
GSM5019297	dge2_I09 RNA-seq of ReNcell VM treated with 1 uM baricitinib	SRA	Homo sapiens	1	GPL18573	GSE164788	SRA Run Selector	https://www.ncbi.nlm.nih.gov/Traces/study/?acc=SRX9834113	SRX9834113	Clemens Hug	Jan 14, 2021
GSM5019298	dge2_I10 RNA-seq of ReNcell VM treated with 10 uM xl019	SRA	Homo sapiens	1	GPL18573	GSE164788	SRA Run Selector	https://www.ncbi.nlm.nih.gov/Traces/study/?acc=SRX9834114	SRX9834114	Clemens Hug	Jan 14, 2021
GSM5019299	dge2_I11 RNA-seq of ReNcell VM treated with 1 uM otssp167	SRA	Homo sapiens	1	GPL18573	GSE164788	SRA Run Selector	https://www.ncbi.nlm.nih.gov/Traces/study/?acc=SRX9834115	SRX9834115	Clemens Hug	Jan 14, 2021
GSM5019300	dge2_I12 RNA-seq of ReNcell VM treated with 1 uM mrt67307	SRA	Homo sapiens	1	GPL18573	GSE164788	SRA Run Selector	https://www.ncbi.nlm.nih.gov/Traces/study/?acc=SRX9834116	SRX9834116	Clemens Hug	Jan 14, 2021
GSM5019301	dge2_I13 RNA-seq of ReNcell VM treated with 10 uM ikk16	SRA	Homo sapiens	1	GPL18573	GSE164788	SRA Run Selector	https://www.ncbi.nlm.nih.gov/Traces/study/?acc=SRX9834120	SRX9834120	Clemens Hug	Jan 14, 2021
GSM5019302	dge2_I14 RNA-seq of ReNcell VM treated with 1 uM xmd16-144	SRA	Homo sapiens	1	GPL18573	GSE164788	SRA Run Selector	https://www.ncbi.nlm.nih.gov/Traces/study/?acc=SRX9834135	SRX9834135	Clemens Hug	Jan 14, 2021
GSM5019303	dge2_I15 RNA-seq of ReNcell VM treated with 10 uM dactolisib	SRA	Homo sapiens	1	GPL18573	GSE164788	SRA Run Selector	https://www.ncbi.nlm.nih.gov/Traces/study/?acc=SRX9834136	SRX9834136	Clemens Hug	Jan 14, 2021
GSM5019304	dge2_I16 RNA-seq of ReNcell VM treated with 10 uM baricitinib + lipofectamine	SRA	Homo sapiens	1	GPL18573	GSE164788	SRA Run Selector	https://www.ncbi.nlm.nih.gov/Traces/study/?acc=SRX9834137	SRX9834137	Clemens Hug	Jan 14, 2021
GSM5019305	dge2_I17 RNA-seq of ReNcell VM treated with 10 uM kw2449	SRA	Homo sapiens	1	GPL18573	GSE164788	SRA Run Selector	https://www.ncbi.nlm.nih.gov/Traces/study/?acc=SRX9834138	SRX9834138	Clemens Hug	Jan 14, 2021
GSM5019306	dge2_I18 RNA-seq of ReNcell VM treated with 10 uM regorafenib	SRA	Homo sapiens	1	GPL18573	GSE164788	SRA Run Selector	https://www.ncbi.nlm.nih.gov/Traces/study/?acc=SRX9834140	SRX9834140	Clemens Hug	Jan 14, 2021
GSM5019307	dge2_I19 RNA-seq of ReNcell VM treated with 10 uM rucaparib	SRA	Homo sapiens	1	GPL18573	GSE164788	SRA Run Selector	https://www.ncbi.nlm.nih.gov/Traces/study/?acc=SRX9834141	SRX9834141	Clemens Hug	Jan 14, 2021
GSM5019308	dge2_I20 RNA-seq of ReNcell VM treated with 10 uM baricitinib + lipofectamine	SRA	Homo sapiens	1	GPL18573	GSE164788	SRA Run Selector	https://www.ncbi.nlm.nih.gov/Traces/study/?acc=SRX9834142	SRX9834142	Clemens Hug	Jan 14, 2021
GSM5019309	dge2_I21 RNA-seq of ReNcell VM treated with 10 uM regorafenib	SRA	Homo sapiens	1	GPL18573	GSE164788	SRA Run Selector	https://www.ncbi.nlm.nih.gov/Traces/study/?acc=SRX9834151	SRX9834151	Clemens Hug	Jan 14, 2021
GSM5019310	dge2_I22 RNA-seq of ReNcell VM treated with 10 uM staurosporine aglycone	SRA	Homo sapiens	1	GPL18573	GSE164788	SRA Run Selector	https://www.ncbi.nlm.nih.gov/Traces/study/?acc=SRX9834152	SRX9834152	Clemens Hug	Jan 14, 2021
GSM5019311	dge2_I23 RNA-seq of ReNcell VM treated with 1 uM dabrafenib	SRA	Homo sapiens	1	GPL18573	GSE164788	SRA Run Selector	https://www.ncbi.nlm.nih.gov/Traces/study/?acc=SRX9834153	SRX9834153	Clemens Hug	Jan 14, 2021
GSM5019312	dge2_I24 RNA-seq of ReNcell VM treated with 1 uM sunitinib	SRA	Homo sapiens	1	GPL18573	GSE164788	SRA Run Selector	https://www.ncbi.nlm.nih.gov/Traces/study/?acc=SRX9834154	SRX9834154	Clemens Hug	Jan 14, 2021
GSM5019313	dge2_J01 RNA-seq of ReNcell VM treated with 1 uM pf-06463922	SRA	Homo sapiens	1	GPL18573	GSE164788	SRA Run Selector	https://www.ncbi.nlm.nih.gov/Traces/study/?acc=SRX9834155	SRX9834155	Clemens Hug	Jan 14, 2021
GSM5019314	dge2_J02 RNA-seq of ReNcell VM treated with 10 uM ruxolitinib	SRA	Homo sapiens	1	GPL18573	GSE164788	SRA Run Selector	https://www.ncbi.nlm.nih.gov/Traces/study/?acc=SRX9834156	SRX9834156	Clemens Hug	Jan 14, 2021
GSM5019315	dge2_J03 RNA-seq of ReNcell VM treated with 10 uM rucaparib	SRA	Homo sapiens	1	GPL18573	GSE164788	SRA Run Selector	https://www.ncbi.nlm.nih.gov/Traces/study/?acc=SRX9834157	SRX9834157	Clemens Hug	Jan 14, 2021
GSM5019316	dge2_J04 RNA-seq of ReNcell VM treated with 1 uM azd-1480	SRA	Homo sapiens	1	GPL18573	GSE164788	SRA Run Selector	https://www.ncbi.nlm.nih.gov/Traces/study/?acc=SRX9834012	SRX9834012	Clemens Hug	Jan 14, 2021
GSM5019317	dge2_J05 RNA-seq of ReNcell VM treated with 10 uM palbociclib	SRA	Homo sapiens	1	GPL18573	GSE164788	SRA Run Selector	https://www.ncbi.nlm.nih.gov/Traces/study/?acc=SRX9834013	SRX9834013	Clemens Hug	Jan 14, 2021
GSM5019318	dge2_J06 RNA-seq of ReNcell VM treated with 1 uM fedratinib + lipofectamine	SRA	Homo sapiens	1	GPL18573	GSE164788	SRA Run Selector	https://www.ncbi.nlm.nih.gov/Traces/study/?acc=SRX9834014	SRX9834014	Clemens Hug	Jan 14, 2021
GSM5019319	dge2_J07 RNA-seq of ReNcell VM treated with dmso	SRA	Homo sapiens	1	GPL18573	GSE164788	SRA Run Selector	https://www.ncbi.nlm.nih.gov/Traces/study/?acc=SRX9834015	SRX9834015	Clemens Hug	Jan 14, 2021
GSM5019320	dge2_J08 RNA-seq of ReNcell VM treated with 1 uM lapatinib	SRA	Homo sapiens	1	GPL18573	GSE164788	SRA Run Selector	https://www.ncbi.nlm.nih.gov/Traces/study/?acc=SRX9834016	SRX9834016	Clemens Hug	Jan 14, 2021
GSM5019321	dge2_J09 RNA-seq of ReNcell VM treated with 1 uM resveratrol	SRA	Homo sapiens	1	GPL18573	GSE164788	SRA Run Selector	https://www.ncbi.nlm.nih.gov/Traces/study/?acc=SRX9834031	SRX9834031	Clemens Hug	Jan 14, 2021
GSM5019322	dge2_J10 RNA-seq of ReNcell VM treated with 1 uM sorafenib	SRA	Homo sapiens	1	GPL18573	GSE164788	SRA Run Selector	https://www.ncbi.nlm.nih.gov/Traces/study/?acc=SRX9834032	SRX9834032	Clemens Hug	Jan 14, 2021
GSM5019323	dge2_J11 RNA-seq of ReNcell VM treated with 1 uM vorinostat	SRA	Homo sapiens	1	GPL18573	GSE164788	SRA Run Selector	https://www.ncbi.nlm.nih.gov/Traces/study/?acc=SRX9834033	SRX9834033	Clemens Hug	Jan 14, 2021
GSM5019324	dge2_J12 RNA-seq of ReNcell VM treated with 1 uM nilotinib	SRA	Homo sapiens	1	GPL18573	GSE164788	SRA Run Selector	https://www.ncbi.nlm.nih.gov/Traces/study/?acc=SRX9834034	SRX9834034	Clemens Hug	Jan 14, 2021
GSM5019325	dge2_J13 RNA-seq of ReNcell VM treated with 1 uM ceritinib	SRA	Homo sapiens	1	GPL18573	GSE164788	SRA Run Selector	https://www.ncbi.nlm.nih.gov/Traces/study/?acc=SRX9834035	SRX9834035	Clemens Hug	Jan 14, 2021
GSM5019326	dge2_J14 RNA-seq of ReNcell VM treated with 10 uM tofacitinib + dsRNA	SRA	Homo sapiens	1	GPL18573	GSE164788	SRA Run Selector	https://www.ncbi.nlm.nih.gov/Traces/study/?acc=SRX9834037	SRX9834037	Clemens Hug	Jan 14, 2021
GSM5019327	dge2_J15 RNA-seq of ReNcell VM treated with 10 uM kw2449	SRA	Homo sapiens	1	GPL18573	GSE164788	SRA Run Selector	https://www.ncbi.nlm.nih.gov/Traces/study/?acc=SRX9834352	SRX9834352	Clemens Hug	Jan 14, 2021
GSM5019328	dge2_J16 RNA-seq of ReNcell VM treated with 1 uM afatinib	SRA	Homo sapiens	1	GPL18573	GSE164788	SRA Run Selector	https://www.ncbi.nlm.nih.gov/Traces/study/?acc=SRX9834353	SRX9834353	Clemens Hug	Jan 14, 2021
GSM5019329	dge2_J17 RNA-seq of ReNcell VM treated with 10 uM ruxolitinib + dsRNA	SRA	Homo sapiens	1	GPL18573	GSE164788	SRA Run Selector	https://www.ncbi.nlm.nih.gov/Traces/study/?acc=SRX9834354	SRX9834354	Clemens Hug	Jan 14, 2021
GSM5019330	dge2_J18 RNA-seq of ReNcell VM treated with 1 uM ponatinib	SRA	Homo sapiens	1	GPL18573	GSE164788	SRA Run Selector	https://www.ncbi.nlm.nih.gov/Traces/study/?acc=SRX9834355	SRX9834355	Clemens Hug	Jan 14, 2021
GSM5019331	dge2_J19 RNA-seq of ReNcell VM treated with 10 uM erlotinib	SRA	Homo sapiens	1	GPL18573	GSE164788	SRA Run Selector	https://www.ncbi.nlm.nih.gov/Traces/study/?acc=SRX9834356	SRX9834356	Clemens Hug	Jan 14, 2021
GSM5019332	dge2_J20 RNA-seq of ReNcell VM treated with 1 uM vx-702	SRA	Homo sapiens	1	GPL18573	GSE164788	SRA Run Selector	https://www.ncbi.nlm.nih.gov/Traces/study/?acc=SRX9834357	SRX9834357	Clemens Hug	Jan 14, 2021
GSM5019333	dge2_J21 RNA-seq of ReNcell VM treated with 10 uM ibrutinib	SRA	Homo sapiens	1	GPL18573	GSE164788	SRA Run Selector	https://www.ncbi.nlm.nih.gov/Traces/study/?acc=SRX9834391	SRX9834391	Clemens Hug	Jan 14, 2021
GSM5019334	dge2_J22 RNA-seq of ReNcell VM treated with 10 uM baricitinib + dsRNA	SRA	Homo sapiens	1	GPL18573	GSE164788	SRA Run Selector	https://www.ncbi.nlm.nih.gov/Traces/study/?acc=SRX9834369	SRX9834369	Clemens Hug	Jan 14, 2021
GSM5019335	dge2_J23 RNA-seq of ReNcell VM treated with 1 uM xl019	SRA	Homo sapiens	1	GPL18573	GSE164788	SRA Run Selector	https://www.ncbi.nlm.nih.gov/Traces/study/?acc=SRX9834370	SRX9834370	Clemens Hug	Jan 14, 2021
GSM5019336	dge2_J24 RNA-seq of ReNcell VM treated with 10 uM staurosporine aglycone	SRA	Homo sapiens	1	GPL18573	GSE164788	SRA Run Selector	https://www.ncbi.nlm.nih.gov/Traces/study/?acc=SRX9834372	SRX9834372	Clemens Hug	Jan 14, 2021
GSM5019337	dge2_K01 RNA-seq of ReNcell VM treated with 1 uM bix 02565	SRA	Homo sapiens	1	GPL18573	GSE164788	SRA Run Selector	https://www.ncbi.nlm.nih.gov/Traces/study/?acc=SRX9834373	SRX9834373	Clemens Hug	Jan 14, 2021
GSM5019338	dge2_K02 RNA-seq of ReNcell VM treated with 1 uM kin001-111	SRA	Homo sapiens	1	GPL18573	GSE164788	SRA Run Selector	https://www.ncbi.nlm.nih.gov/Traces/study/?acc=SRX9834374	SRX9834374	Clemens Hug	Jan 14, 2021
GSM5019339	dge2_K03 RNA-seq of ReNcell VM treated with 1 uM sorafenib	SRA	Homo sapiens	1	GPL18573	GSE164788	SRA Run Selector	https://www.ncbi.nlm.nih.gov/Traces/study/?acc=SRX9834375	SRX9834375	Clemens Hug	Jan 14, 2021
GSM5019340	dge2_K04 RNA-seq of ReNcell VM treated with 1 uM plx-4720	SRA	Homo sapiens	1	GPL18573	GSE164788	SRA Run Selector	https://www.ncbi.nlm.nih.gov/Traces/study/?acc=SRX9834376	SRX9834376	Clemens Hug	Jan 14, 2021
GSM5019341	dge2_K05 RNA-seq of ReNcell VM treated with 1 uM sunitinib	SRA	Homo sapiens	1	GPL18573	GSE164788	SRA Run Selector	https://www.ncbi.nlm.nih.gov/Traces/study/?acc=SRX9834394	SRX9834394	Clemens Hug	Jan 14, 2021
GSM5019342	dge2_K06 RNA-seq of ReNcell VM treated with 10 uM canertinib	SRA	Homo sapiens	1	GPL18573	GSE164788	SRA Run Selector	https://www.ncbi.nlm.nih.gov/Traces/study/?acc=SRX9834395	SRX9834395	Clemens Hug	Jan 14, 2021
GSM5019343	dge2_K07 RNA-seq of ReNcell VM treated with 1 uM nintedanib	SRA	Homo sapiens	1	GPL18573	GSE164788	SRA Run Selector	https://www.ncbi.nlm.nih.gov/Traces/study/?acc=SRX9834396	SRX9834396	Clemens Hug	Jan 14, 2021
GSM5019344	dge2_K08 RNA-seq of ReNcell VM treated with 10 uM az-628	SRA	Homo sapiens	1	GPL18573	GSE164788	SRA Run Selector	https://www.ncbi.nlm.nih.gov/Traces/study/?acc=SRX9834397	SRX9834397	Clemens Hug	Jan 14, 2021
GSM5019345	dge2_K09 RNA-seq of ReNcell VM treated with 1 uM kw2449	SRA	Homo sapiens	1	GPL18573	GSE164788	SRA Run Selector	https://www.ncbi.nlm.nih.gov/Traces/study/?acc=SRX9834398	SRX9834398	Clemens Hug	Jan 14, 2021
GSM5019346	dge2_K10 RNA-seq of ReNcell VM treated with 1 uM enzastaurin	SRA	Homo sapiens	1	GPL18573	GSE164788	SRA Run Selector	https://www.ncbi.nlm.nih.gov/Traces/study/?acc=SRX9834478	SRX9834478	Clemens Hug	Jan 14, 2021
GSM5019347	dge2_K11 RNA-seq of ReNcell VM treated with 10 uM fedratinib	SRA	Homo sapiens	1	GPL18573	GSE164788	SRA Run Selector	https://www.ncbi.nlm.nih.gov/Traces/study/?acc=SRX9834499	SRX9834499	Clemens Hug	Jan 14, 2021
GSM5019348	dge2_K12 RNA-seq of ReNcell VM treated with 1 uM dasatinib	SRA	Homo sapiens	1	GPL18573	GSE164788	SRA Run Selector	https://www.ncbi.nlm.nih.gov/Traces/study/?acc=SRX9834500	SRX9834500	Clemens Hug	Jan 14, 2021
GSM5019349	dge2_K13 RNA-seq of ReNcell VM treated with 1 uM bosutinib	SRA	Homo sapiens	1	GPL18573	GSE164788	SRA Run Selector	https://www.ncbi.nlm.nih.gov/Traces/study/?acc=SRX9834501	SRX9834501	Clemens Hug	Jan 14, 2021
GSM5019350	dge2_K14 RNA-seq of ReNcell VM treated with 10 uM vx-702	SRA	Homo sapiens	1	GPL18573	GSE164788	SRA Run Selector	https://www.ncbi.nlm.nih.gov/Traces/study/?acc=SRX9834502	SRX9834502	Clemens Hug	Jan 14, 2021
GSM5019351	dge2_K15 RNA-seq of ReNcell VM treated with 10 uM jwe-035	SRA	Homo sapiens	1	GPL18573	GSE164788	SRA Run Selector	https://www.ncbi.nlm.nih.gov/Traces/study/?acc=SRX9834503	SRX9834503	Clemens Hug	Jan 14, 2021
GSM5019352	dge2_K16 RNA-seq of ReNcell VM treated with 1 uM enzastaurin	SRA	Homo sapiens	1	GPL18573	GSE164788	SRA Run Selector	https://www.ncbi.nlm.nih.gov/Traces/study/?acc=SRX9834504	SRX9834504	Clemens Hug	Jan 14, 2021
GSM5019353	dge2_K17 RNA-seq of ReNcell VM treated with 1 uM fedratinib	SRA	Homo sapiens	1	GPL18573	GSE164788	SRA Run Selector	https://www.ncbi.nlm.nih.gov/Traces/study/?acc=SRX9834505	SRX9834505	Clemens Hug	Jan 14, 2021
GSM5019354	dge2_K18 RNA-seq of ReNcell VM treated with 1 uM azd-1480	SRA	Homo sapiens	1	GPL18573	GSE164788	SRA Run Selector	https://www.ncbi.nlm.nih.gov/Traces/study/?acc=SRX9834521	SRX9834521	Clemens Hug	Jan 14, 2021
GSM5019355	dge2_K19 RNA-seq of ReNcell VM treated with 1 uM ikk16	SRA	Homo sapiens	1	GPL18573	GSE164788	SRA Run Selector	https://www.ncbi.nlm.nih.gov/Traces/study/?acc=SRX9834522	SRX9834522	Clemens Hug	Jan 14, 2021
GSM5019356	dge2_K20 RNA-seq of ReNcell VM treated with 1 uM belinostat	SRA	Homo sapiens	1	GPL18573	GSE164788	SRA Run Selector	https://www.ncbi.nlm.nih.gov/Traces/study/?acc=SRX9834524	SRX9834524	Clemens Hug	Jan 14, 2021
GSM5019357	dge2_K21 RNA-seq of ReNcell VM treated with 1 uM xl019	SRA	Homo sapiens	1	GPL18573	GSE164788	SRA Run Selector	https://www.ncbi.nlm.nih.gov/Traces/study/?acc=SRX9834525	SRX9834525	Clemens Hug	Jan 14, 2021
GSM5019358	dge2_K22 RNA-seq of ReNcell VM treated with 10 uM celastrol	SRA	Homo sapiens	1	GPL18573	GSE164788	SRA Run Selector	https://www.ncbi.nlm.nih.gov/Traces/study/?acc=SRX9834526	SRX9834526	Clemens Hug	Jan 14, 2021
GSM5019359	dge2_K23 RNA-seq of ReNcell VM treated with 1 uM nilotinib	SRA	Homo sapiens	1	GPL18573	GSE164788	SRA Run Selector	https://www.ncbi.nlm.nih.gov/Traces/study/?acc=SRX9834527	SRX9834527	Clemens Hug	Jan 14, 2021
GSM5019360	dge2_K24 RNA-seq of ReNcell VM treated with 1 uM mrt67307	SRA	Homo sapiens	1	GPL18573	GSE164788	SRA Run Selector	https://www.ncbi.nlm.nih.gov/Traces/study/?acc=SRX9834535	SRX9834535	Clemens Hug	Jan 14, 2021
GSM5019361	dge2_L01 RNA-seq of ReNcell VM treated with 10 uM xl019 + lipofectamine	SRA	Homo sapiens	1	GPL18573	GSE164788	SRA Run Selector	https://www.ncbi.nlm.nih.gov/Traces/study/?acc=SRX9834536	SRX9834536	Clemens Hug	Jan 14, 2021
GSM5019362	dge2_L02 RNA-seq of ReNcell VM treated with 1 uM tofacitinib	SRA	Homo sapiens	1	GPL18573	GSE164788	SRA Run Selector	https://www.ncbi.nlm.nih.gov/Traces/study/?acc=SRX9834537	SRX9834537	Clemens Hug	Jan 14, 2021
GSM5019363	dge2_L03 RNA-seq of ReNcell VM treated with 10 uM azd-1480	SRA	Homo sapiens	1	GPL18573	GSE164788	SRA Run Selector	https://www.ncbi.nlm.nih.gov/Traces/study/?acc=SRX9834538	SRX9834538	Clemens Hug	Jan 14, 2021
GSM5019364	dge2_L04 RNA-seq of ReNcell VM treated with 10 uM y-27632	SRA	Homo sapiens	1	GPL18573	GSE164788	SRA Run Selector	https://www.ncbi.nlm.nih.gov/Traces/study/?acc=SRX9834539	SRX9834539	Clemens Hug	Jan 14, 2021
GSM5019365	dge2_L05 RNA-seq of ReNcell VM treated with 10 uM ruxolitinib + lipofectamine	SRA	Homo sapiens	1	GPL18573	GSE164788	SRA Run Selector	https://www.ncbi.nlm.nih.gov/Traces/study/?acc=SRX9834540	SRX9834540	Clemens Hug	Jan 14, 2021
GSM5019366	dge2_L06 RNA-seq of ReNcell VM treated with 10 uM vx-702	SRA	Homo sapiens	1	GPL18573	GSE164788	SRA Run Selector	https://www.ncbi.nlm.nih.gov/Traces/study/?acc=SRX9834545	SRX9834545	Clemens Hug	Jan 14, 2021
GSM5019367	dge2_L07 RNA-seq of ReNcell VM treated with dmso	SRA	Homo sapiens	1	GPL18573	GSE164788	SRA Run Selector	https://www.ncbi.nlm.nih.gov/Traces/study/?acc=SRX9834546	SRX9834546	Clemens Hug	Jan 14, 2021
GSM5019368	dge2_L08 RNA-seq of ReNcell VM treated with 1 uM belinostat	SRA	Homo sapiens	1	GPL18573	GSE164788	SRA Run Selector	https://www.ncbi.nlm.nih.gov/Traces/study/?acc=SRX9834547	SRX9834547	Clemens Hug	Jan 14, 2021
GSM5019369	dge2_L09 RNA-seq of ReNcell VM treated with 1 uM axitinib	SRA	Homo sapiens	1	GPL18573	GSE164788	SRA Run Selector	https://www.ncbi.nlm.nih.gov/Traces/study/?acc=SRX9834548	SRX9834548	Clemens Hug	Jan 14, 2021
GSM5019370	dge2_L10 RNA-seq of ReNcell VM treated with 10 uM gefitinib	SRA	Homo sapiens	1	GPL18573	GSE164788	SRA Run Selector	https://www.ncbi.nlm.nih.gov/Traces/study/?acc=SRX9834549	SRX9834549	Clemens Hug	Jan 14, 2021
GSM5019371	dge2_L11 RNA-seq of ReNcell VM treated with 1 uM ly2090314	SRA	Homo sapiens	1	GPL18573	GSE164788	SRA Run Selector	https://www.ncbi.nlm.nih.gov/Traces/study/?acc=SRX9833944	SRX9833944	Clemens Hug	Jan 14, 2021
GSM5019372	dge2_L12 RNA-seq of ReNcell VM treated with 10 uM h89	SRA	Homo sapiens	1	GPL18573	GSE164788	SRA Run Selector	https://www.ncbi.nlm.nih.gov/Traces/study/?acc=SRX9833945	SRX9833945	Clemens Hug	Jan 14, 2021
GSM5019373	dge2_L13 RNA-seq of ReNcell VM treated with 1 uM ibrutinib	SRA	Homo sapiens	1	GPL18573	GSE164788	SRA Run Selector	https://www.ncbi.nlm.nih.gov/Traces/study/?acc=SRX9833946	SRX9833946	Clemens Hug	Jan 14, 2021
GSM5019374	dge2_L14 RNA-seq of ReNcell VM treated with 1 uM dasatinib	SRA	Homo sapiens	1	GPL18573	GSE164788	SRA Run Selector	https://www.ncbi.nlm.nih.gov/Traces/study/?acc=SRX9833953	SRX9833953	Clemens Hug	Jan 14, 2021
GSM5019375	dge2_L15 RNA-seq of ReNcell VM treated with 10 uM tofacitinib + dsRNA	SRA	Homo sapiens	1	GPL18573	GSE164788	SRA Run Selector	https://www.ncbi.nlm.nih.gov/Traces/study/?acc=SRX9833954	SRX9833954	Clemens Hug	Jan 14, 2021
GSM5019376	dge2_L16 RNA-seq of ReNcell VM treated with 1 uM kin001-111	SRA	Homo sapiens	1	GPL18573	GSE164788	SRA Run Selector	https://www.ncbi.nlm.nih.gov/Traces/study/?acc=SRX9833956	SRX9833956	Clemens Hug	Jan 14, 2021
GSM5019377	dge2_L17 RNA-seq of ReNcell VM treated with 1 uM enzastaurin	SRA	Homo sapiens	1	GPL18573	GSE164788	SRA Run Selector	https://www.ncbi.nlm.nih.gov/Traces/study/?acc=SRX9833957	SRX9833957	Clemens Hug	Jan 14, 2021
GSM5019378	dge2_L18 RNA-seq of ReNcell VM treated with 1 uM celastrol	SRA	Homo sapiens	1	GPL18573	GSE164788	SRA Run Selector	https://www.ncbi.nlm.nih.gov/Traces/study/?acc=SRX9833958	SRX9833958	Clemens Hug	Jan 14, 2021
GSM5019379	dge2_L19 RNA-seq of ReNcell VM treated with 10 uM bix 02565	SRA	Homo sapiens	1	GPL18573	GSE164788	SRA Run Selector	https://www.ncbi.nlm.nih.gov/Traces/study/?acc=SRX9833959	SRX9833959	Clemens Hug	Jan 14, 2021
GSM5019380	dge2_L20 RNA-seq of ReNcell VM treated with 1 uM dactolisib	SRA	Homo sapiens	1	GPL18573	GSE164788	SRA Run Selector	https://www.ncbi.nlm.nih.gov/Traces/study/?acc=SRX9833968	SRX9833968	Clemens Hug	Jan 14, 2021
GSM5019381	dge2_L21 RNA-seq of ReNcell VM treated with 10 uM enzastaurin	SRA	Homo sapiens	1	GPL18573	GSE164788	SRA Run Selector	https://www.ncbi.nlm.nih.gov/Traces/study/?acc=SRX9833969	SRX9833969	Clemens Hug	Jan 14, 2021
GSM5019382	dge2_L22 RNA-seq of ReNcell VM treated with 1 uM ly2090314	SRA	Homo sapiens	1	GPL18573	GSE164788	SRA Run Selector	https://www.ncbi.nlm.nih.gov/Traces/study/?acc=SRX9833971	SRX9833971	Clemens Hug	Jan 14, 2021
GSM5019383	dge2_L23 RNA-seq of ReNcell VM treated with 10 uM dabrafenib	SRA	Homo sapiens	1	GPL18573	GSE164788	SRA Run Selector	https://www.ncbi.nlm.nih.gov/Traces/study/?acc=SRX9833972	SRX9833972	Clemens Hug	Jan 14, 2021
GSM5019384	dge2_L24 RNA-seq of ReNcell VM treated with 10 uM jwe-035	SRA	Homo sapiens	1	GPL18573	GSE164788	SRA Run Selector	https://www.ncbi.nlm.nih.gov/Traces/study/?acc=SRX9833973	SRX9833973	Clemens Hug	Jan 14, 2021
GSM5019385	dge2_M01 RNA-seq of ReNcell VM treated with 10 uM nintedanib	SRA	Homo sapiens	1	GPL18573	GSE164788	SRA Run Selector	https://www.ncbi.nlm.nih.gov/Traces/study/?acc=SRX9833974	SRX9833974	Clemens Hug	Jan 14, 2021
GSM5019386	dge2_M02 RNA-seq of ReNcell VM treated with 1 uM kin001-111	SRA	Homo sapiens	1	GPL18573	GSE164788	SRA Run Selector	https://www.ncbi.nlm.nih.gov/Traces/study/?acc=SRX9833983	SRX9833983	Clemens Hug	Jan 14, 2021
GSM5019387	dge2_M03 RNA-seq of ReNcell VM treated with dsRNA	SRA	Homo sapiens	1	GPL18573	GSE164788	SRA Run Selector	https://www.ncbi.nlm.nih.gov/Traces/study/?acc=SRX9833984	SRX9833984	Clemens Hug	Jan 14, 2021
GSM5019388	dge2_M04 RNA-seq of ReNcell VM treated with 10 uM lapatinib	SRA	Homo sapiens	1	GPL18573	GSE164788	SRA Run Selector	https://www.ncbi.nlm.nih.gov/Traces/study/?acc=SRX9833985	SRX9833985	Clemens Hug	Jan 14, 2021
GSM5019389	dge2_M05 RNA-seq of ReNcell VM treated with 1 uM afatinib	SRA	Homo sapiens	1	GPL18573	GSE164788	SRA Run Selector	https://www.ncbi.nlm.nih.gov/Traces/study/?acc=SRX9833986	SRX9833986	Clemens Hug	Jan 14, 2021
GSM5019390	dge2_M06 RNA-seq of ReNcell VM treated with 10 uM lapatinib	SRA	Homo sapiens	1	GPL18573	GSE164788	SRA Run Selector	https://www.ncbi.nlm.nih.gov/Traces/study/?acc=SRX9834006	SRX9834006	Clemens Hug	Jan 14, 2021
GSM5019391	dge2_M07 RNA-seq of ReNcell VM treated with 1 uM regorafenib	SRA	Homo sapiens	1	GPL18573	GSE164788	SRA Run Selector	https://www.ncbi.nlm.nih.gov/Traces/study/?acc=SRX9834007	SRX9834007	Clemens Hug	Jan 14, 2021
GSM5019392	dge2_M08 RNA-seq of ReNcell VM treated with dmso	SRA	Homo sapiens	1	GPL18573	GSE164788	SRA Run Selector	https://www.ncbi.nlm.nih.gov/Traces/study/?acc=SRX9834008	SRX9834008	Clemens Hug	Jan 14, 2021
GSM5019393	dge2_M09 RNA-seq of ReNcell VM treated with 10 uM palbociclib	SRA	Homo sapiens	1	GPL18573	GSE164788	SRA Run Selector	https://www.ncbi.nlm.nih.gov/Traces/study/?acc=SRX9834000	SRX9834000	Clemens Hug	Jan 14, 2021
GSM5019394	dge2_M10 RNA-seq of ReNcell VM treated with dmso	SRA	Homo sapiens	1	GPL18573	GSE164788	SRA Run Selector	https://www.ncbi.nlm.nih.gov/Traces/study/?acc=SRX9834001	SRX9834001	Clemens Hug	Jan 14, 2021
GSM5019395	dge2_M11 RNA-seq of ReNcell VM treated with 1 uM vx-702	SRA	Homo sapiens	1	GPL18573	GSE164788	SRA Run Selector	https://www.ncbi.nlm.nih.gov/Traces/study/?acc=SRX9834002	SRX9834002	Clemens Hug	Jan 14, 2021
GSM5019396	dge2_M12 RNA-seq of ReNcell VM treated with 10 uM vorinostat	SRA	Homo sapiens	1	GPL18573	GSE164788	SRA Run Selector	https://www.ncbi.nlm.nih.gov/Traces/study/?acc=SRX9834004	SRX9834004	Clemens Hug	Jan 14, 2021
GSM5019397	dge2_M13 RNA-seq of ReNcell VM treated with 1 uM rucaparib	SRA	Homo sapiens	1	GPL18573	GSE164788	SRA Run Selector	https://www.ncbi.nlm.nih.gov/Traces/study/?acc=SRX9834005	SRX9834005	Clemens Hug	Jan 14, 2021
GSM5019398	dge2_M14 RNA-seq of ReNcell VM treated with 10 uM axitinib	SRA	Homo sapiens	1	GPL18573	GSE164788	SRA Run Selector	https://www.ncbi.nlm.nih.gov/Traces/study/?acc=SRX9834011	SRX9834011	Clemens Hug	Jan 14, 2021
GSM5019399	dge2_M15 RNA-seq of ReNcell VM treated with 10 uM otssp167	SRA	Homo sapiens	1	GPL18573	GSE164788	SRA Run Selector	https://www.ncbi.nlm.nih.gov/Traces/study/?acc=SRX9834175	SRX9834175	Clemens Hug	Jan 14, 2021
GSM5019400	dge2_M16 RNA-seq of ReNcell VM treated with 1 uM sorafenib	SRA	Homo sapiens	1	GPL18573	GSE164788	SRA Run Selector	https://www.ncbi.nlm.nih.gov/Traces/study/?acc=SRX9834176	SRX9834176	Clemens Hug	Jan 14, 2021
GSM5019401	dge2_M17 RNA-seq of ReNcell VM treated with 10 uM ibrutinib	SRA	Homo sapiens	1	GPL18573	GSE164788	SRA Run Selector	https://www.ncbi.nlm.nih.gov/Traces/study/?acc=SRX9834177	SRX9834177	Clemens Hug	Jan 14, 2021
GSM5019402	dge2_M18 RNA-seq of ReNcell VM treated with 10 uM xmd16-144	SRA	Homo sapiens	1	GPL18573	GSE164788	SRA Run Selector	https://www.ncbi.nlm.nih.gov/Traces/study/?acc=SRX9834178	SRX9834178	Clemens Hug	Jan 14, 2021
GSM5019403	dge2_M19 RNA-seq of ReNcell VM treated with 1 uM neratinib	SRA	Homo sapiens	1	GPL18573	GSE164788	SRA Run Selector	https://www.ncbi.nlm.nih.gov/Traces/study/?acc=SRX9834179	SRX9834179	Clemens Hug	Jan 14, 2021
GSM5019404	dge2_M20 RNA-seq of ReNcell VM treated with 10 uM azd1480 + lipofectamine	SRA	Homo sapiens	1	GPL18573	GSE164788	SRA Run Selector	https://www.ncbi.nlm.nih.gov/Traces/study/?acc=SRX9834180	SRX9834180	Clemens Hug	Jan 14, 2021
GSM5019405	dge2_M21 RNA-seq of ReNcell VM treated with dsRNA	SRA	Homo sapiens	1	GPL18573	GSE164788	SRA Run Selector	https://www.ncbi.nlm.nih.gov/Traces/study/?acc=SRX9834181	SRX9834181	Clemens Hug	Jan 14, 2021
GSM5019406	dge2_M22 RNA-seq of ReNcell VM treated with 1 uM neratinib	SRA	Homo sapiens	1	GPL18573	GSE164788	SRA Run Selector	https://www.ncbi.nlm.nih.gov/Traces/study/?acc=SRX9834183	SRX9834183	Clemens Hug	Jan 14, 2021
GSM5019407	dge2_M23 RNA-seq of ReNcell VM treated with 10 uM at9283	SRA	Homo sapiens	1	GPL18573	GSE164788	SRA Run Selector	https://www.ncbi.nlm.nih.gov/Traces/study/?acc=SRX9834184	SRX9834184	Clemens Hug	Jan 14, 2021
GSM5019408	dge2_M24 RNA-seq of ReNcell VM treated with 10 uM y-27632	SRA	Homo sapiens	1	GPL18573	GSE164788	SRA Run Selector	https://www.ncbi.nlm.nih.gov/Traces/study/?acc=SRX9834185	SRX9834185	Clemens Hug	Jan 14, 2021
GSM5019409	dge2_N01 RNA-seq of ReNcell VM treated with 1 uM rucaparib	SRA	Homo sapiens	1	GPL18573	GSE164788	SRA Run Selector	https://www.ncbi.nlm.nih.gov/Traces/study/?acc=SRX9834186	SRX9834186	Clemens Hug	Jan 14, 2021
GSM5019410	dge2_N02 RNA-seq of ReNcell VM treated with 1 uM ruxolitinib	SRA	Homo sapiens	1	GPL18573	GSE164788	SRA Run Selector	https://www.ncbi.nlm.nih.gov/Traces/study/?acc=SRX9834187	SRX9834187	Clemens Hug	Jan 14, 2021
GSM5019411	dge2_N03 RNA-seq of ReNcell VM treated with 10 uM azd1480 + dsRNA	SRA	Homo sapiens	1	GPL18573	GSE164788	SRA Run Selector	https://www.ncbi.nlm.nih.gov/Traces/study/?acc=SRX9834188	SRX9834188	Clemens Hug	Jan 14, 2021
GSM5019412	dge2_N04 RNA-seq of ReNcell VM treated with 10 uM bix 02565	SRA	Homo sapiens	1	GPL18573	GSE164788	SRA Run Selector	https://www.ncbi.nlm.nih.gov/Traces/study/?acc=SRX9834189	SRX9834189	Clemens Hug	Jan 14, 2021
GSM5019413	dge2_N05 RNA-seq of ReNcell VM treated with 1 uM celastrol	SRA	Homo sapiens	1	GPL18573	GSE164788	SRA Run Selector	https://www.ncbi.nlm.nih.gov/Traces/study/?acc=SRX9834205	SRX9834205	Clemens Hug	Jan 14, 2021
GSM5019414	dge2_N06 RNA-seq of ReNcell VM treated with dmso	SRA	Homo sapiens	1	GPL18573	GSE164788	SRA Run Selector	https://www.ncbi.nlm.nih.gov/Traces/study/?acc=SRX9834206	SRX9834206	Clemens Hug	Jan 14, 2021
GSM5019415	dge2_N07 RNA-seq of ReNcell VM treated with 1 uM staurosporine aglycone	SRA	Homo sapiens	1	GPL18573	GSE164788	SRA Run Selector	https://www.ncbi.nlm.nih.gov/Traces/study/?acc=SRX9834218	SRX9834218	Clemens Hug	Jan 14, 2021
GSM5019416	dge2_N08 RNA-seq of ReNcell VM treated with 1 uM neratinib	SRA	Homo sapiens	1	GPL18573	GSE164788	SRA Run Selector	https://www.ncbi.nlm.nih.gov/Traces/study/?acc=SRX9834221	SRX9834221	Clemens Hug	Jan 14, 2021
GSM5019417	dge2_N09 RNA-seq of ReNcell VM treated with 10 uM ikk16	SRA	Homo sapiens	1	GPL18573	GSE164788	SRA Run Selector	https://www.ncbi.nlm.nih.gov/Traces/study/?acc=SRX9834222	SRX9834222	Clemens Hug	Jan 14, 2021
GSM5019418	dge2_N10 RNA-seq of ReNcell VM treated with 10 uM resveratrol	SRA	Homo sapiens	1	GPL18573	GSE164788	SRA Run Selector	https://www.ncbi.nlm.nih.gov/Traces/study/?acc=SRX9834214	SRX9834214	Clemens Hug	Jan 14, 2021
GSM5019419	dge2_N11 RNA-seq of ReNcell VM treated with 10 uM kin001-111	SRA	Homo sapiens	1	GPL18573	GSE164788	SRA Run Selector	https://www.ncbi.nlm.nih.gov/Traces/study/?acc=SRX9834215	SRX9834215	Clemens Hug	Jan 14, 2021
GSM5019420	dge2_N12 RNA-seq of ReNcell VM treated with 10 uM enzastaurin	SRA	Homo sapiens	1	GPL18573	GSE164788	SRA Run Selector	https://www.ncbi.nlm.nih.gov/Traces/study/?acc=SRX9834216	SRX9834216	Clemens Hug	Jan 14, 2021
GSM5019421	dge2_N13 RNA-seq of ReNcell VM treated with 1 uM fedratinib	SRA	Homo sapiens	1	GPL18573	GSE164788	SRA Run Selector	https://www.ncbi.nlm.nih.gov/Traces/study/?acc=SRX9834217	SRX9834217	Clemens Hug	Jan 14, 2021
GSM5019422	dge2_N14 RNA-seq of ReNcell VM treated with 1 uM fedratinib + dsRNA	SRA	Homo sapiens	1	GPL18573	GSE164788	SRA Run Selector	https://www.ncbi.nlm.nih.gov/Traces/study/?acc=SRX9834223	SRX9834223	Clemens Hug	Jan 14, 2021
GSM5019423	dge2_N15 RNA-seq of ReNcell VM treated with 1 uM imatinib	SRA	Homo sapiens	1	GPL18573	GSE164788	SRA Run Selector	https://www.ncbi.nlm.nih.gov/Traces/study/?acc=SRX9834224	SRX9834224	Clemens Hug	Jan 14, 2021
GSM5019424	dge2_N16 RNA-seq of ReNcell VM treated with 1 uM kw2449	SRA	Homo sapiens	1	GPL18573	GSE164788	SRA Run Selector	https://www.ncbi.nlm.nih.gov/Traces/study/?acc=SRX9834225	SRX9834225	Clemens Hug	Jan 14, 2021
GSM5019425	dge2_N17 RNA-seq of ReNcell VM treated with 1 uM dabrafenib	SRA	Homo sapiens	1	GPL18573	GSE164788	SRA Run Selector	https://www.ncbi.nlm.nih.gov/Traces/study/?acc=SRX9834244	SRX9834244	Clemens Hug	Jan 14, 2021
GSM5019426	dge2_N18 RNA-seq of ReNcell VM treated with 1 uM imatinib	SRA	Homo sapiens	1	GPL18573	GSE164788	SRA Run Selector	https://www.ncbi.nlm.nih.gov/Traces/study/?acc=SRX9834246	SRX9834246	Clemens Hug	Jan 14, 2021
GSM5019427	dge2_N19 RNA-seq of ReNcell VM treated with 1 uM xl019	SRA	Homo sapiens	1	GPL18573	GSE164788	SRA Run Selector	https://www.ncbi.nlm.nih.gov/Traces/study/?acc=SRX9834247	SRX9834247	Clemens Hug	Jan 14, 2021
GSM5019428	dge2_N20 RNA-seq of ReNcell VM treated with 1 uM dabrafenib	SRA	Homo sapiens	1	GPL18573	GSE164788	SRA Run Selector	https://www.ncbi.nlm.nih.gov/Traces/study/?acc=SRX9834248	SRX9834248	Clemens Hug	Jan 14, 2021
GSM5019429	dge2_N21 RNA-seq of ReNcell VM treated with 1 uM fedratinib + lipofectamine	SRA	Homo sapiens	1	GPL18573	GSE164788	SRA Run Selector	https://www.ncbi.nlm.nih.gov/Traces/study/?acc=SRX9834249	SRX9834249	Clemens Hug	Jan 14, 2021
GSM5019430	dge2_N22 RNA-seq of ReNcell VM treated with 10 uM az-628	SRA	Homo sapiens	1	GPL18573	GSE164788	SRA Run Selector	https://www.ncbi.nlm.nih.gov/Traces/study/?acc=SRX9834307	SRX9834307	Clemens Hug	Jan 14, 2021
GSM5019431	dge2_N23 RNA-seq of ReNcell VM treated with 10 uM torin2	SRA	Homo sapiens	1	GPL18573	GSE164788	SRA Run Selector	https://www.ncbi.nlm.nih.gov/Traces/study/?acc=SRX9834260	SRX9834260	Clemens Hug	Jan 14, 2021
GSM5019432	dge2_N24 RNA-seq of ReNcell VM treated with 10 uM erlotinib	SRA	Homo sapiens	1	GPL18573	GSE164788	SRA Run Selector	https://www.ncbi.nlm.nih.gov/Traces/study/?acc=SRX9834261	SRX9834261	Clemens Hug	Jan 14, 2021
GSM5019433	dge2_O01 RNA-seq of ReNcell VM treated with 1 uM gefitinib	SRA	Homo sapiens	1	GPL18573	GSE164788	SRA Run Selector	https://www.ncbi.nlm.nih.gov/Traces/study/?acc=SRX9834262	SRX9834262	Clemens Hug	Jan 14, 2021
GSM5019434	dge2_O02 RNA-seq of ReNcell VM treated with 10 uM plx-4720	SRA	Homo sapiens	1	GPL18573	GSE164788	SRA Run Selector	https://www.ncbi.nlm.nih.gov/Traces/study/?acc=SRX9834263	SRX9834263	Clemens Hug	Jan 14, 2021
GSM5019435	dge2_O03 RNA-seq of ReNcell VM treated with 10 uM mrt67307	SRA	Homo sapiens	1	GPL18573	GSE164788	SRA Run Selector	https://www.ncbi.nlm.nih.gov/Traces/study/?acc=SRX9834264	SRX9834264	Clemens Hug	Jan 14, 2021
GSM5019436	dge2_O04 RNA-seq of ReNcell VM treated with 1 uM bosutinib	SRA	Homo sapiens	1	GPL18573	GSE164788	SRA Run Selector	https://www.ncbi.nlm.nih.gov/Traces/study/?acc=SRX9834266	SRX9834266	Clemens Hug	Jan 14, 2021
GSM5019437	dge2_O05 RNA-seq of ReNcell VM treated with 10 uM baricitinib	SRA	Homo sapiens	1	GPL18573	GSE164788	SRA Run Selector	https://www.ncbi.nlm.nih.gov/Traces/study/?acc=SRX9834267	SRX9834267	Clemens Hug	Jan 14, 2021
GSM5019438	dge2_O06 RNA-seq of ReNcell VM treated with 1 uM fedratinib + dsRNA	SRA	Homo sapiens	1	GPL18573	GSE164788	SRA Run Selector	https://www.ncbi.nlm.nih.gov/Traces/study/?acc=SRX9834283	SRX9834283	Clemens Hug	Jan 14, 2021
GSM5019439	dge2_O07 RNA-seq of ReNcell VM treated with 1 uM canertinib	SRA	Homo sapiens	1	GPL18573	GSE164788	SRA Run Selector	https://www.ncbi.nlm.nih.gov/Traces/study/?acc=SRX9834284	SRX9834284	Clemens Hug	Jan 14, 2021
GSM5019440	dge2_O08 RNA-seq of ReNcell VM treated with 10 uM kw2449	SRA	Homo sapiens	1	GPL18573	GSE164788	SRA Run Selector	https://www.ncbi.nlm.nih.gov/Traces/study/?acc=SRX9834285	SRX9834285	Clemens Hug	Jan 14, 2021
GSM5019441	dge2_O09 RNA-seq of ReNcell VM treated with 10 uM xl019	SRA	Homo sapiens	1	GPL18573	GSE164788	SRA Run Selector	https://www.ncbi.nlm.nih.gov/Traces/study/?acc=SRX9834286	SRX9834286	Clemens Hug	Jan 14, 2021
GSM5019442	dge2_O10 RNA-seq of ReNcell VM treated with 10 uM ly2090314	SRA	Homo sapiens	1	GPL18573	GSE164788	SRA Run Selector	https://www.ncbi.nlm.nih.gov/Traces/study/?acc=SRX9834287	SRX9834287	Clemens Hug	Jan 14, 2021
GSM5019443	dge2_O11 RNA-seq of ReNcell VM treated with 10 uM pf-06463922	SRA	Homo sapiens	1	GPL18573	GSE164788	SRA Run Selector	https://www.ncbi.nlm.nih.gov/Traces/study/?acc=SRX9834288	SRX9834288	Clemens Hug	Jan 14, 2021
GSM5019444	dge2_O12 RNA-seq of ReNcell VM treated with 1 uM axitinib	SRA	Homo sapiens	1	GPL18573	GSE164788	SRA Run Selector	https://www.ncbi.nlm.nih.gov/Traces/study/?acc=SRX9834289	SRX9834289	Clemens Hug	Jan 14, 2021
GSM5019445	dge2_O13 RNA-seq of ReNcell VM treated with 10 uM sunitinib	SRA	Homo sapiens	1	GPL18573	GSE164788	SRA Run Selector	https://www.ncbi.nlm.nih.gov/Traces/study/?acc=SRX9834305	SRX9834305	Clemens Hug	Jan 14, 2021
GSM5019446	dge2_O14 RNA-seq of ReNcell VM treated with 10 uM afatinib	SRA	Homo sapiens	1	GPL18573	GSE164788	SRA Run Selector	https://www.ncbi.nlm.nih.gov/Traces/study/?acc=SRX9834312	SRX9834312	Clemens Hug	Jan 14, 2021
GSM5019447	dge2_O15 RNA-seq of ReNcell VM treated with 10 uM baricitinib + lipofectamine	SRA	Homo sapiens	1	GPL18573	GSE164788	SRA Run Selector	https://www.ncbi.nlm.nih.gov/Traces/study/?acc=SRX9834313	SRX9834313	Clemens Hug	Jan 14, 2021
GSM5019448	dge2_O16 RNA-seq of ReNcell VM treated with 1 uM baricitinib + lipofectamine	SRA	Homo sapiens	1	GPL18573	GSE164788	SRA Run Selector	https://www.ncbi.nlm.nih.gov/Traces/study/?acc=SRX9834314	SRX9834314	Clemens Hug	Jan 14, 2021
GSM5019449	dge2_O17 RNA-seq of ReNcell VM treated with 10 uM xl019 + dsRNA	SRA	Homo sapiens	1	GPL18573	GSE164788	SRA Run Selector	https://www.ncbi.nlm.nih.gov/Traces/study/?acc=SRX9834315	SRX9834315	Clemens Hug	Jan 14, 2021
GSM5019450	dge2_O18 RNA-seq of ReNcell VM treated with 10 uM at9283	SRA	Homo sapiens	1	GPL18573	GSE164788	SRA Run Selector	https://www.ncbi.nlm.nih.gov/Traces/study/?acc=SRX9834316	SRX9834316	Clemens Hug	Jan 14, 2021
GSM5019451	dge2_O19 RNA-seq of ReNcell VM treated with 1 uM baricitinib + lipofectamine	SRA	Homo sapiens	1	GPL18573	GSE164788	SRA Run Selector	https://www.ncbi.nlm.nih.gov/Traces/study/?acc=SRX9834404	SRX9834404	Clemens Hug	Jan 14, 2021
GSM5019452	dge2_O20 RNA-seq of ReNcell VM treated with 1 uM y-27632	SRA	Homo sapiens	1	GPL18573	GSE164788	SRA Run Selector	https://www.ncbi.nlm.nih.gov/Traces/study/?acc=SRX9834405	SRX9834405	Clemens Hug	Jan 14, 2021
GSM5019453	dge2_O21 RNA-seq of ReNcell VM treated with 1 uM imatinib	SRA	Homo sapiens	1	GPL18573	GSE164788	SRA Run Selector	https://www.ncbi.nlm.nih.gov/Traces/study/?acc=SRX9834406	SRX9834406	Clemens Hug	Jan 14, 2021
GSM5019454	dge2_O22 RNA-seq of ReNcell VM treated with 1 uM ruxolitinib	SRA	Homo sapiens	1	GPL18573	GSE164788	SRA Run Selector	https://www.ncbi.nlm.nih.gov/Traces/study/?acc=SRX9834407	SRX9834407	Clemens Hug	Jan 14, 2021
GSM5019455	dge2_O23 RNA-seq of ReNcell VM treated with 10 uM sorafenib	SRA	Homo sapiens	1	GPL18573	GSE164788	SRA Run Selector	https://www.ncbi.nlm.nih.gov/Traces/study/?acc=SRX9834412	SRX9834412	Clemens Hug	Jan 14, 2021
GSM5019456	dge2_O24 RNA-seq of ReNcell VM treated with 10 uM plx-4720	SRA	Homo sapiens	1	GPL18573	GSE164788	SRA Run Selector	https://www.ncbi.nlm.nih.gov/Traces/study/?acc=SRX9834414	SRX9834414	Clemens Hug	Jan 14, 2021
GSM5019457	dge2_P01 RNA-seq of ReNcell VM treated with 10 uM h89	SRA	Homo sapiens	1	GPL18573	GSE164788	SRA Run Selector	https://www.ncbi.nlm.nih.gov/Traces/study/?acc=SRX9834429	SRX9834429	Clemens Hug	Jan 14, 2021
GSM5019458	dge2_P02 RNA-seq of ReNcell VM treated with 10 uM resveratrol	SRA	Homo sapiens	1	GPL18573	GSE164788	SRA Run Selector	https://www.ncbi.nlm.nih.gov/Traces/study/?acc=SRX9834430	SRX9834430	Clemens Hug	Jan 14, 2021
GSM5019459	dge2_P03 RNA-seq of ReNcell VM treated with 10 uM dovitinib	SRA	Homo sapiens	1	GPL18573	GSE164788	SRA Run Selector	https://www.ncbi.nlm.nih.gov/Traces/study/?acc=SRX9834431	SRX9834431	Clemens Hug	Jan 14, 2021
GSM5019460	dge2_P04 RNA-seq of ReNcell VM treated with 10 uM ruxolitinib + lipofectamine	SRA	Homo sapiens	1	GPL18573	GSE164788	SRA Run Selector	https://www.ncbi.nlm.nih.gov/Traces/study/?acc=SRX9834432	SRX9834432	Clemens Hug	Jan 14, 2021
GSM5019461	dge2_P05 RNA-seq of ReNcell VM treated with 10 uM ly2090314	SRA	Homo sapiens	1	GPL18573	GSE164788	SRA Run Selector	https://www.ncbi.nlm.nih.gov/Traces/study/?acc=SRX9834433	SRX9834433	Clemens Hug	Jan 14, 2021
GSM5019462	dge2_P06 RNA-seq of ReNcell VM treated with 10 uM nintedanib	SRA	Homo sapiens	1	GPL18573	GSE164788	SRA Run Selector	https://www.ncbi.nlm.nih.gov/Traces/study/?acc=SRX9834434	SRX9834434	Clemens Hug	Jan 14, 2021
GSM5019463	dge2_P07 RNA-seq of ReNcell VM treated with 1 uM erlotinib	SRA	Homo sapiens	1	GPL18573	GSE164788	SRA Run Selector	https://www.ncbi.nlm.nih.gov/Traces/study/?acc=SRX9834435	SRX9834435	Clemens Hug	Jan 14, 2021
GSM5019464	dge2_P08 RNA-seq of ReNcell VM treated with 1 uM h89	SRA	Homo sapiens	1	GPL18573	GSE164788	SRA Run Selector	https://www.ncbi.nlm.nih.gov/Traces/study/?acc=SRX9834443	SRX9834443	Clemens Hug	Jan 14, 2021
GSM5019465	dge2_P09 RNA-seq of ReNcell VM treated with 10 uM mrt67307	SRA	Homo sapiens	1	GPL18573	GSE164788	SRA Run Selector	https://www.ncbi.nlm.nih.gov/Traces/study/?acc=SRX9834444	SRX9834444	Clemens Hug	Jan 14, 2021
GSM5019466	dge2_P10 RNA-seq of ReNcell VM treated with 10 uM torin2	SRA	Homo sapiens	1	GPL18573	GSE164788	SRA Run Selector	https://www.ncbi.nlm.nih.gov/Traces/study/?acc=SRX9834446	SRX9834446	Clemens Hug	Jan 14, 2021
GSM5019467	dge2_P11 RNA-seq of ReNcell VM treated with dmso	SRA	Homo sapiens	1	GPL18573	GSE164788	SRA Run Selector	https://www.ncbi.nlm.nih.gov/Traces/study/?acc=SRX9834447	SRX9834447	Clemens Hug	Jan 14, 2021
GSM5019468	dge2_P12 RNA-seq of ReNcell VM treated with dmso	SRA	Homo sapiens	1	GPL18573	GSE164788	SRA Run Selector	https://www.ncbi.nlm.nih.gov/Traces/study/?acc=SRX9834448	SRX9834448	Clemens Hug	Jan 14, 2021
GSM5019469	dge2_P13 RNA-seq of ReNcell VM treated with 10 uM bosutinib	SRA	Homo sapiens	1	GPL18573	GSE164788	SRA Run Selector	https://www.ncbi.nlm.nih.gov/Traces/study/?acc=SRX9834449	SRX9834449	Clemens Hug	Jan 14, 2021
GSM5019470	dge2_P14 RNA-seq of ReNcell VM treated with 10 uM ruxolitinib	SRA	Homo sapiens	1	GPL18573	GSE164788	SRA Run Selector	https://www.ncbi.nlm.nih.gov/Traces/study/?acc=SRX9834450	SRX9834450	Clemens Hug	Jan 14, 2021
GSM5019471	dge2_P15 RNA-seq of ReNcell VM treated with 10 uM ceritinib	SRA	Homo sapiens	1	GPL18573	GSE164788	SRA Run Selector	https://www.ncbi.nlm.nih.gov/Traces/study/?acc=SRX9834459	SRX9834459	Clemens Hug	Jan 14, 2021
GSM5019472	dge2_P16 RNA-seq of ReNcell VM treated with 10 uM kin001-111	SRA	Homo sapiens	1	GPL18573	GSE164788	SRA Run Selector	https://www.ncbi.nlm.nih.gov/Traces/study/?acc=SRX9834460	SRX9834460	Clemens Hug	Jan 14, 2021
GSM5019473	dge2_P17 RNA-seq of ReNcell VM treated with 1 uM pf-06463922	SRA	Homo sapiens	1	GPL18573	GSE164788	SRA Run Selector	https://www.ncbi.nlm.nih.gov/Traces/study/?acc=SRX9834461	SRX9834461	Clemens Hug	Jan 14, 2021
GSM5019474	dge2_P18 RNA-seq of ReNcell VM treated with 10 uM plx-4720	SRA	Homo sapiens	1	GPL18573	GSE164788	SRA Run Selector	https://www.ncbi.nlm.nih.gov/Traces/study/?acc=SRX9834462	SRX9834462	Clemens Hug	Jan 14, 2021
GSM5019475	dge2_P19 RNA-seq of ReNcell VM treated with 10 uM resveratrol	SRA	Homo sapiens	1	GPL18573	GSE164788	SRA Run Selector	https://www.ncbi.nlm.nih.gov/Traces/study/?acc=SRX9834463	SRX9834463	Clemens Hug	Jan 14, 2021
GSM5019476	dge2_P20 RNA-seq of ReNcell VM treated with 10 uM pf-06463922	SRA	Homo sapiens	1	GPL18573	GSE164788	SRA Run Selector	https://www.ncbi.nlm.nih.gov/Traces/study/?acc=SRX9834465	SRX9834465	Clemens Hug	Jan 14, 2021
GSM5019477	dge2_P21 RNA-seq of ReNcell VM treated with 1 uM fedratinib + dsRNA	SRA	Homo sapiens	1	GPL18573	GSE164788	SRA Run Selector	https://www.ncbi.nlm.nih.gov/Traces/study/?acc=SRX9834473	SRX9834473	Clemens Hug	Jan 14, 2021
GSM5019478	dge2_P22 RNA-seq of ReNcell VM treated with 10 uM bix 02565	SRA	Homo sapiens	1	GPL18573	GSE164788	SRA Run Selector	https://www.ncbi.nlm.nih.gov/Traces/study/?acc=SRX9834474	SRX9834474	Clemens Hug	Jan 14, 2021
GSM5019479	dge2_P23 RNA-seq of ReNcell VM treated with 1 uM vandetanib	SRA	Homo sapiens	1	GPL18573	GSE164788	SRA Run Selector	https://www.ncbi.nlm.nih.gov/Traces/study/?acc=SRX9834475	SRX9834475	Clemens Hug	Jan 14, 2021
GSM5019480	dge2_P24 RNA-seq of ReNcell VM treated with 1 uM y-27632	SRA	Homo sapiens	1	GPL18573	GSE164788	SRA Run Selector	https://www.ncbi.nlm.nih.gov/Traces/study/?acc=SRX9834476	SRX9834476	Clemens Hug	Jan 14, 2021
